# Supplementary material
Source: MDPI journal article supplement (https://www.mdpi.com/search?q=remotesensing-16-02216)
Supplement: s001 [file remotesensing-16-02216-s001.zip]

## README

- (1) SoCal Spreadsheets contains Rochester and Fontana Spreadsheets
  - Graphs in “CDFs” tab were used in the analysis as Figure 2
  - Data extracted from Table 1 of tabs B2, B3, B4, B5 were applied
  - Pinacate and Lk Newell AOIs, with data extracted from 3 images.
- (2) Data tables in the six images from the two AOIs were formatted according to Appendix B that uses 7-29-23 B2 as an example. Please start with the Lk Newell spreadsheets where the “Premise” tab explains the analysis. The summary in each of the 6 spreadsheets provides the graphs that are reproduced in the paper.
- (3) Bandwise CDFs collate data for Lake Newell and El Pinacate Figure 7.
