# Supplementary material
Source: MDPI journal article supplement (https://www.mdpi.com/search?q=remotesensing-16-02216)
Supplement: s001 [file remotesensing-16-02216-s001.zip]

## Sheet: Readme
	This workbook examines three treatments of L8/9 data: TOAR, CMAC, and LaSRC
	The L8/9 dataset was developed for the AOI enclosed by the Rochester shapefile
	Data summaries are presented in Stats table that contains CV% and in CDFs that allow
		comparison of the three treatments

## Sheet: Stats Table
				These data are developed in spreadsheets B2, B3, B4, and B5
					Rochester QIA Statistics				Average n=31 image sample				Four bands		Three treatments
					Percentile		Blue			Green			Red			NIR
					TOAR	Avg	StDev	CV%	Avg	StDev	CV%	Avg	StDev	CV%	Avg	StDev	CV%
					1	1218.32	72.1981	0.0592602	1047.68	68.7306	0.0656028	940.452	65.584	0.0697367	1374.65	74.0853	0.0538942
					3	1268.94	68.609	0.0540682	1114.32	64.7175	0.0580779	1022	62.8374	0.0614847	1575.29	61.5728	0.0390867
					5	1306.35	67.5907	0.0517399	1157.68	62.0228	0.0535752	1077.26	58.7162	0.0545053	1678.71	62.6616	0.0373273
					10	1385.06	63.0988	0.0455566	1246.19	58.3732	0.0468412	1190.48	56.3252	0.0473128	1818.9	68.1089	0.037445
					15	1450.26	59.9555	0.0413413	1325.06	57.2963	0.0432404	1289.61	54.2836	0.042093	1904.03	70.4805	0.0370164
					20	1509.35	59.0816	0.0391436	1395.45	55.366	0.039676	1377.52	53.5592	0.038881	1972.65	74.3073	0.0376688
					25	1567.03	59.913	0.0382334	1463.13	56.7942	0.038817	1459.84	56.9714	0.0390258	2036.68	77.9176	0.0382572
					30	1626.74	60.0583	0.0369194	1529.71	59.1677	0.038679	1544.23	59.1014	0.0382725	2097.55	79.2346	0.0377749
					35	1686.77	62.8812	0.037279	1599.29	62.4063	0.0390212	1630.1	62.7839	0.0385155	2158.48	80.9563	0.0375061
					40	1754.35	65.4617	0.0373138	1679.13	63.277	0.0376844	1723.81	63.1097	0.0366106	2218.03	84.6119	0.0381473
					45	1824.45	67.8065	0.0371654	1760.32	67.3327	0.0382502	1817.71	66.5123	0.0365912	2277.97	88.3668	0.038792
					50	1895.84	71.5575	0.0377445	1841.58	72.3421	0.0392826	1911.9	76.3284	0.0399227	2335.16	90.9517	0.0389488
					55	1972.68	79.3282	0.0402135	1932.19	80.7021	0.0417671	2018.52	86.7409	0.0429726	2391.87	95.7047	0.0400125
					60	2052.52	86.1034	0.0419502	2027.77	90.3654	0.0445639	2130.06	94.6654	0.0444425	2455.97	99.3041	0.0404338
					65	2131.1	92.7643	0.0435289	2119.48	98.288	0.0463735	2227.74	101.053	0.0453612	2533.61	102.426	0.0404268
					70	2208.68	100.713	0.0455989	2207.39	107.34	0.0486274	2324.71	112.117	0.0482285	2635.42	124.827	0.0473652
					75	2294.45	109.956	0.0479226	2304.19	115.974	0.0503318	2442.39	123.12	0.0504098	2792.29	170.739	0.0611466
					80	2415.87	135.174	0.0559527	2446.42	149.07	0.0609338	2611.9	173.607	0.0664677	3039.03	238.931	0.0786206
					85	2661.77	223.331	0.0839031	2734.81	252.524	0.092337	2957.68	290.48	0.098212	3472.84	340.387	0.098014
					90	3150.03	333	0.105713	3319.13	395.63	0.119197	3647.94	459.069	0.125843	4233.61	494.042	0.116695
					95	3962.39	344.995	0.0870676	4230.39	363.352	0.0858909	4673.1	409.323	0.0875915	5353.74	403.403	0.0753497
					CMAC	Avg	StDev	CV%	Avg	StDev	CV%	Avg	StDev	CV%	Avg	StDev	CV%
					1	391.903	26.9967	0.0688862	616.161	38.2423	0.0620654	660	43.5293	0.0659534	1234	75.2223	0.0609581
					3	456.742	25.8908	0.0566857	697.839	35.6577	0.0510974	754	42.5107	0.0563802	1449.81	58.7925	0.040552
					5	506.71	27.2888	0.0538549	751.194	33.4299	0.0445024	819	40.5219	0.0494773	1561.84	58.8383	0.0376724
					10	610.29	28.7207	0.0470607	861.935	36.384	0.042212	952	41.9211	0.0440348	1713.74	66.1866	0.0386211
					15	696.903	30.9218	0.0443703	960.355	40.4249	0.0420937	1069	45.4767	0.0425414	1806.16	70.7084	0.0391484
					20	775.226	37.8107	0.0487738	1048.16	44.417	0.0423761	1173	48.8922	0.0416814	1880.29	76.3052	0.0405816
					25	851.065	44.0477	0.051756	1132.29	50.3377	0.0444565	1270	56.4964	0.0444854	1950	81.5316	0.0418111
					30	929.194	49.8841	0.0536854	1215.65	58.1117	0.0478032	1369	62.322	0.0455237	2015.9	84.1492	0.0417427
					35	1008.61	59.927	0.0594153	1302.94	65.8245	0.0505201	1470	68.9183	0.0468832	2082.06	86.9202	0.0417471
					40	1097.9	69.7206	0.0635034	1402.35	70.9993	0.0506286	1580	71.5345	0.045275	2146.68	92.0237	0.042868
					45	1190.42	79.2581	0.06658	1503.81	78.6221	0.052282	1690	77.1988	0.0456798	2211.71	97.1649	0.043932
					50	1285.06	86.2759	0.0671374	1604.77	87.5308	0.054544	1801	89.9814	0.0499619	2273.65	100.354	0.0441379
					55	1386.77	100.03	0.0721316	1718.13	99.8107	0.0580927	1926	103.12	0.0535411	2335.23	106.237	0.0454933
					60	1491.26	111.412	0.0747098	1837.16	113.209	0.0616215	2057	113.015	0.0549417	2404.71	110.509	0.0459551
					65	1594.45	121.436	0.0761615	1951.32	124.075	0.0635853	2172	121.827	0.0560897	2488.81	113.785	0.0457188
					70	1696.32	133.831	0.0788948	2061.23	135.962	0.0659616	2286	134.124	0.0586717	2599.45	137.096	0.0527405
					75	1809.58	146.976	0.0812211	2182.52	146.368	0.0670641	2425	145.594	0.0600386	2768.9	183.528	0.0662819
					80	1969.16	180.593	0.0917105	2359.55	185.269	0.078519	2623	200.107	0.0762894	3036.45	256.206	0.0843767
					85	2292.87	293.699	0.128092	2718.87	309.453	0.113817	3028	330.613	0.109185	3508.52	362.442	0.103304
					90	2936.32	434.545	0.14799	3446.35	481.293	0.139653	3839	522.762	0.136171	4330.26	525.191	0.121284
					95	4005.84	432.903	0.108068	4582.45	418.88	0.0914096	5050	445.624	0.0882424	5549.71	413.92	0.0745841
					LaSRC	Avg	StDev	CV%	Avg	StDev	CV%	Avg	StDev	CV%	Avg	StDev	CV%
					1	331.452	67.2368	0.202856	671.935	63.0079	0.0937708	672.516	49.1887	0.0731412	1247.77	76.1878	0.061059
					3	446.419	52.1464	0.11681	767.677	57.1655	0.0744655	776.258	48.368	0.0623092	1467.52	58.4716	0.0398439
					5	510.548	43.9893	0.0861608	827.194	53.4605	0.0646288	846.258	49.1596	0.0580905	1576.87	57.9412	0.0367444
					10	617.032	38.8068	0.0628926	938.935	52.5001	0.0559145	980.161	48.801	0.0497888	1728.94	67.1967	0.0388659
					15	700.613	36.5136	0.0521167	1035.32	51.4642	0.0497083	1097.26	44.8419	0.0408673	1818.45	71.6928	0.0394252
					20	777.516	33.992	0.0437187	1121.71	51.2225	0.0456647	1197.32	47.3782	0.0395701	1891.32	75.6286	0.0399872
					25	851.903	35.4225	0.0415805	1202.39	55.4092	0.0460827	1294.9	52.8566	0.040819	1957.97	80.7005	0.0412164
					30	927	38.2501	0.0412622	1284.23	59.6063	0.0464142	1390.13	56.4959	0.0406407	2022.52	83.1388	0.0411066
					35	1007.94	45.8468	0.0454858	1371.77	64.118	0.0467409	1491.81	61.2467	0.0410554	2087.42	85.5577	0.0409873
					40	1093.84	51.1274	0.0467412	1469	67.0845	0.0456668	1600.9	64.1687	0.0400828	2149.97	90.3609	0.042029
					45	1180.68	57.4145	0.0486284	1566.74	73.6356	0.0469992	1708.71	70.0096	0.0409722	2212.13	95.0431	0.0429645
					50	1265.48	66.3214	0.0524079	1665.48	82.1453	0.0493222	1818.74	85.1571	0.046822	2270.42	97.6206	0.0429967
					55	1358.39	77.8163	0.0572858	1774.61	94.7184	0.0533741	1940.35	94.6599	0.0487849	2330.39	103.355	0.0443508
					60	1456.68	91.0631	0.0625143	1889.55	104.503	0.0553058	2066.87	105.088	0.0508441	2396.58	107.053	0.0446689
					65	1554.94	102.487	0.0659108	1999.58	118.407	0.0592161	2179.94	114.565	0.0525543	2478.16	109.715	0.0442729
					70	1657.13	116.841	0.0705078	2105.42	129.923	0.0617088	2289.9	129.017	0.0563415	2584.65	132.279	0.0511786
					75	1776	134.535	0.0757518	2225.97	140.216	0.0629912	2425.94	140.236	0.0578068	2747.52	176.183	0.0641244
					80	1944.84	174.978	0.0899704	2398.48	178.385	0.0743739	2619.84	196.128	0.0748628	3005.45	246.712	0.082088
					85	2266.61	289.929	0.127913	2747.74	302.639	0.110141	3011.97	328.924	0.109206	3455.29	350.475	0.101432
					90	2906.48	425.405	0.146364	3442.65	460.311	0.133708	3783.81	501.776	0.132611	4231.61	497.092	0.117471
					95	3914.35	415.881	0.106245	4498.48	400.413	0.0890106	4904.77	429.971	0.0876637	5358.52	394.171	0.0735597

## Sheet: CDFs
																																			Averages, n=31

## Sheet: B2
B2
			There are four tables in this spreadsheet. The three stacked below examine (1) statistics of precision, (2) assessment and error, and (3) preparation of data for examination of error for low reflectance data. The last table (scroll to the right) ranks the % error.																																						Values from the error tables that are ranked and displayed
																																									n=651
		Table 1 Reflectance Values, Average, Stdev and CoV% by percentile (rows)
			SZA	23.22	26.41	24.48	22.54	27.86	23	27.37	24.11	22.01	22.6	23.4	27.44	26.48	22.59	25.75	21.84	24.18	26.9	21.78	23.64	23.33	21.94	26.17	28.03	25.31	24.23	25.39	22.27	21.76	22.09	23.94								%	Ranked % Error
			Atm-I	890	891	892	893	898	903	904	908	912	916	932	934	937	942	944	945	950	951	954	957	959	962	973	974	982	994	995	996	1009	1018	1062							Step	Cum. Step	CMAC	LaSRC
			SENSOR	L8	L8	L8	L8	L8	L8	L8	L8	L8	L9	L9	L9	L9	L8	L8	L9	L9	L8	L8	L8	L8	L8	L8	L8	L8	L8	L9	L8	L8	L8	L8							1	0.0015361	-0.238831	-0.296149
			TOA	07-09-22	08-02-19	07-19-20	07-01-19	08-10-22	07-06-21	08-07-21	07-17-19	06-23-22	07-01-22	07-10-22	08-11-22	08-02-22	07-02-22	07-28-20	06-15-22	07-17-22	08-04-20	06-13-21	07-12-20	07-10-19	06-20-21	07-31-21	08-11-19	07-26-19	07-18-22	07-26-22	06-26-20	06-16-22	06-24-19	07-15-21	Avg	StDev	CV%				2	0.0030722	-0.236083	-0.25949
			1	1133	1112	1132	1145	1118	1152	1133	1173	1153	1176	1190	1175	1204	1197	1214	1246	1208	1233	1218	1239	1238	1233	1250	1237	1268	1282	1298	1314	1344	1362	1391	1218.32	72.1981	0.0592602				3	0.00460829	-0.206491	-0.251301
			3	1181	1170	1181	1212	1180	1208	1182	1229	1202	1232	1246	1225	1250	1257	1263	1296	1254	1284	1271	1293	1288	1275	1303	1278	1314	1334	1338	1366	1384	1415	1426	1268.94	68.609	0.0540682				4	0.00614439	-0.203543	-0.233068
			5	1219	1203	1224	1248	1219	1248	1222	1259	1244	1272	1285	1265	1287	1292	1302	1328	1289	1321	1312	1323	1331	1311	1344	1316	1353	1375	1376	1408	1416	1446	1459	1306.35	67.5907	0.0517399				5	0.00768049	-0.191334	-0.229748
			10	1312	1276	1306	1325	1299	1330	1303	1334	1338	1360	1383	1342	1366	1382	1376	1413	1370	1385	1409	1399	1406	1389	1421	1394	1409	1453	1457	1481	1498	1514	1507	1385.06	63.0988	0.0455566				6	0.00921659	-0.180875	-0.226428
			15	1378	1346	1368	1399	1372	1394	1370	1400	1409	1430	1459	1408	1431	1459	1445	1478	1437	1434	1474	1469	1477	1438	1485	1453	1489	1516	1521	1536	1557	1578	1548	1450.26	59.9555	0.0413413				7	0.0107527	-0.175198	-0.213673
			20	1454	1401	1427	1454	1431	1445	1426	1454	1477	1492	1526	1476	1483	1530	1511	1539	1493	1483	1536	1534	1550	1494	1551	1504	1542	1576	1579	1588	1620	1632	1582	1509.35	59.0816	0.0391436				8	0.0122888	-0.159528	-0.206949
			25	1519	1446	1482	1506	1492	1503	1491	1501	1545	1553	1593	1550	1544	1603	1566	1601	1560	1525	1597	1588	1598	1544	1603	1561	1586	1643	1630	1647	1683	1694	1624	1567.03	59.913	0.0382334				9	0.0138249	-0.1502	-0.20295
			30	1587	1497	1542	1559	1558	1560	1560	1555	1609	1626	1667	1607	1606	1675	1621	1664	1622	1572	1672	1649	1650	1604	1673	1615	1637	1699	1690	1700	1741	1748	1664	1626.74	60.0583	0.0369194				10	0.015361	-0.146773	-0.191039
			35	1652	1551	1590	1624	1618	1618	1620	1611	1686	1684	1739	1679	1676	1756	1672	1732	1674	1615	1730	1717	1707	1660	1735	1664	1694	1755	1757	1757	1811	1804	1702	1686.77	62.8812	0.037279				11	0.0168971	-0.146326	-0.179947
			40	1731	1614	1654	1706	1690	1689	1680	1662	1761	1764	1820	1760	1742	1838	1734	1797	1748	1662	1816	1777	1784	1717	1803	1731	1751	1829	1823	1811	1875	1870	1746	1754.35	65.4617	0.0373138				12	0.0184332	-0.144971	-0.160748
			45	1807	1685	1718	1784	1770	1753	1751	1737	1848	1846	1894	1845	1815	1922	1808	1866	1815	1714	1894	1850	1853	1782	1881	1779	1816	1893	1889	1876	1952	1930	1785	1824.45	67.8065	0.0371654				13	0.0199693	-0.140778	-0.155525
			50	1893	1744	1790	1860	1843	1829	1829	1800	1936	1916	1976	1921	1885	2007	1877	1935	1888	1769	1968	1919	1920	1854	1963	1841	1883	1967	1955	1945	2025	1998	1835	1895.84	71.5575	0.0377445				14	0.0215054	-0.140669	-0.151309
			55	1984	1810	1859	1925	1933	1897	1912	1868	2014	2008	2075	2008	1969	2108	1950	2014	1963	1823	2058	2003	1999	1924	2030	1908	1947	2049	2029	2021	2108	2074	1883	1972.68	79.3282	0.0402135				15	0.0230415	-0.140377	-0.14225
			60	2065	1884	1947	2006	2017	1960	1997	1932	2102	2100	2173	2119	2049	2212	2025	2101	2047	1881	2138	2078	2083	2001	2120	1977	2025	2136	2103	2091	2184	2138	1937	2052.52	86.1034	0.0419502				16	0.0245776	-0.140166	-0.13791
			65	2166	1949	2024	2098	2105	2024	2087	2009	2182	2166	2259	2198	2125	2305	2101	2172	2116	1939	2221	2166	2155	2063	2226	2057	2108	2214	2170	2176	2264	2230	1989	2131.1	92.7643	0.0435289				17	0.0261137	-0.132693	-0.137713
			70	2257	2024	2095	2170	2183	2104	2168	2080	2284	2260	2353	2290	2211	2402	2168	2267	2201	1992	2289	2230	2239	2126	2302	2113	2170	2294	2260	2237	2356	2293	2051	2208.68	100.713	0.0455989				18	0.0276498	-0.130956	-0.134336
			75	2370	2101	2165	2257	2297	2186	2261	2148	2396	2377	2451	2389	2303	2508	2247	2366	2296	2059	2375	2300	2308	2216	2385	2192	2240	2384	2336	2303	2451	2355	2106	2294.45	109.956	0.0479226				19	0.0291859	-0.126472	-0.133466
			80	2571	2201	2283	2361	2430	2301	2366	2260	2645	2589	2602	2517	2424	2644	2342	2559	2447	2145	2465	2406	2404	2334	2497	2276	2318	2490	2441	2396	2563	2450	2165	2415.87	135.174	0.0559527				20	0.030722	-0.124652	-0.129643
			85	3006	2373	2484	2538	2765	2558	2616	2412	3000	2961	2990	2860	2757	3059	2466	2887	2753	2298	2642	2531	2564	2541	2672	2414	2439	2822	2775	2526	2919	2590	2297	2661.77	223.331	0.0839031				21	0.0322581	-0.123128	-0.12831
			90	3613	2793	2869	2956	3318	2990	3072	2856	3661	3570	3653	3467	3299	3743	2863	3533	3295	2631	3157	2943	2932	2923	3183	2804	2842	3379	3271	2933	3571	2981	2550	3150.03	333	0.105713				22	0.0337942	-0.123128	-0.12831
			95	4430	3810	3714	3738	4088	3755	4007	3902	4683	4476	4437	4173	4062	4546	3673	4285	4063	3335	3916	3813	3900	3697	3975	3707	3782	4070	3909	3845	4273	3676	3094	3962.39	344.995	0.0870676				23	0.0353303	-0.119185	-0.126459
			CMAC	07-09-22	08-02-19	07-19-20	07-01-19	08-10-22	07-06-21	08-07-21	07-17-19	06-23-22	07-01-22	07-10-22	08-11-22	08-02-22	07-02-22	07-28-20	06-15-22	07-17-22	08-04-20	06-13-21	07-12-20	07-10-19	06-20-21	07-31-21	08-11-19	07-26-19	07-18-22	07-26-22	06-26-20	06-16-22	06-24-19	07-15-21	Avg	StDev	CV%				24	0.0368664	-0.118145	-0.12444
			1	376	360	377	396	351	381	360	405	367	391	371	356	392	381	396	432	372	394	385	400	404	375	387	367	392	399	410	437	449	463	423	391.903	26.9967	0.0688862				25	0.0384025	-0.115972	-0.119714
			3	433	421	439	473	427	448	417	467	431	470	455	425	449	448	455	490	441	469	447	473	463	429	461	431	456	468	463	501	505	526	478	456.742	25.8908	0.0566857				26	0.0399386	-0.109382	-0.114093
			5	492	471	491	520	469	496	472	514	477	515	509	474	497	501	506	541	480	513	502	510	524	483	508	475	514	523	520	560	553	585	513	506.71	27.2888	0.0538549				27	0.0414747	-0.107971	-0.113546
			10	598	559	597	615	573	597	572	607	604	630	633	573	603	617	607	644	590	594	629	614	626	590	612	580	589	630	635	657	669	682	593	610.29	28.7207	0.0470607				28	0.0430108	-0.107912	-0.113448
			15	685	647	677	708	658	685	657	688	693	718	730	665	692	718	701	735	678	662	720	706	715	659	705	662	692	720	720	739	748	768	653	696.903	30.9218	0.0443703				29	0.0445469	-0.106147	-0.109931
			20	772	717	747	778	741	747	726	759	773	798	821	748	761	808	786	814	746	729	797	794	818	732	794	738	767	803	799	814	843	855	707	775.226	37.8107	0.0487738				30	0.0460829	-0.103888	-0.108761
			25	862	772	813	841	819	823	807	817	864	878	906	841	840	903	855	895	838	788	879	869	883	800	865	806	830	893	871	896	929	936	764	851.065	44.0477	0.051756				31	0.047619	-0.0993553	-0.105144
			30	940	834	890	909	895	893	895	884	950	968	996	922	918	999	929	976	922	847	982	945	947	880	957	883	897	969	955	970	1013	1011	829	929.194	49.8841	0.0536854				32	0.0491551	-0.0991462	-0.104656
			35	1024	906	947	989	973	966	969	956	1047	1039	1099	1012	1005	1106	995	1071	990	903	1058	1033	1022	953	1045	949	978	1051	1050	1045	1110	1092	884	1008.61	59.927	0.0594153				33	0.0506912	-0.0983838	-0.100764
			40	1120	974	1024	1092	1064	1055	1045	1025	1143	1144	1203	1119	1093	1215	1077	1158	1086	969	1171	1119	1129	1031	1135	1037	1054	1154	1147	1124	1200	1178	950	1097.9	69.7206	0.0635034				34	0.0522273	-0.0963386	-0.100689
			45	1215	1063	1107	1187	1167	1134	1138	1114	1250	1246	1300	1229	1186	1322	1172	1249	1178	1034	1276	1217	1221	1118	1243	1104	1144	1240	1236	1212	1315	1275	1011	1190.42	79.2581	0.06658				35	0.0537634	-0.0959452	-0.0981877
			50	1326	1144	1195	1281	1253	1232	1236	1198	1363	1339	1406	1328	1282	1434	1266	1338	1274	1111	1373	1308	1309	1216	1355	1192	1238	1341	1324	1313	1413	1366	1083	1285.06	86.2759	0.0671374				36	0.0552995	-0.0955607	-0.0962161
			55	1437	1225	1281	1363	1368	1320	1338	1281	1459	1456	1534	1441	1391	1569	1359	1444	1376	1180	1497	1420	1418	1306	1448	1284	1326	1458	1428	1415	1530	1478	1160	1386.77	100.03	0.0721316				37	0.0568356	-0.0924658	-0.0941426
			60	1537	1314	1392	1462	1475	1402	1444	1363	1570	1569	1657	1586	1491	1704	1461	1557	1481	1257	1600	1517	1531	1414	1569	1374	1433	1580	1531	1516	1637	1571	1234	1491.26	111.412	0.0747098				38	0.0583717	-0.0919223	-0.0931135
			65	1662	1392	1486	1579	1583	1478	1558	1459	1673	1653	1767	1689	1591	1826	1559	1650	1576	1336	1713	1638	1622	1496	1709	1481	1547	1687	1624	1633	1749	1697	1315	1594.45	121.436	0.0761615				39	0.0599078	-0.0865881	-0.0913605
			70	1773	1484	1572	1667	1680	1579	1661	1546	1805	1775	1891	1807	1703	1953	1644	1774	1686	1406	1802	1724	1735	1579	1813	1558	1631	1799	1749	1716	1879	1790	1405	1696.32	133.831	0.0788948				40	0.0614439	-0.0849582	-0.0867211
			75	1915	1583	1661	1774	1822	1681	1776	1634	1947	1923	2017	1937	1824	2092	1749	1904	1812	1494	1916	1817	1827	1702	1927	1664	1727	1923	1857	1811	2015	1878	1488	1809.58	146.976	0.0812211				41	0.06298	-0.0834522	-0.0847983
			80	2168	1705	1807	1903	1989	1827	1909	1775	2266	2191	2216	2103	1982	2271	1874	2160	2012	1609	2036	1957	1954	1859	2080	1780	1833	2071	2003	1939	2174	2012	1579	1969.16	180.593	0.0917105				42	0.0645161	-0.0822595	-0.083437
			85	2708	1918	2056	2124	2410	2150	2226	1967	2718	2661	2714	2552	2417	2816	2037	2594	2417	1814	2272	2125	2168	2139	2320	1967	2001	2532	2469	2119	2676	2212	1780	2292.87	293.699	0.128092				43	0.0660522	-0.0813424	-0.0819303
			90	3451	2436	2533	2648	3101	2696	2797	2528	3550	3443	3572	3339	3122	3714	2563	3446	3133	2257	2959	2673	2656	2653	3012	2499	2555	3308	3158	2695	3602	2770	2157	2936.32	434.545	0.14799				44	0.0675883	-0.0812449	-0.0818884
			95	4482	3713	3578	3613	4086	3654	3984	3849	4868	4602	4574	4264	4101	4766	3615	4406	4146	3190	3967	3832	3957	3691	4082	3727	3850	4254	4051	3962	4571	3771	2975	4005.84	432.903	0.108068				45	0.0691244	-0.0772705	-0.0806045
			LaSRC_Surface	07-09-22	08-02-19	07-19-20	07-01-19	08-10-22	07-06-21	08-07-21	07-17-19	06-23-22	07-01-22	07-10-22	08-11-22	08-02-22	07-02-22	07-28-20	06-15-22	07-17-22	08-04-20	06-13-21	07-12-20	07-10-19	06-20-21	07-31-21	08-11-19	07-26-19	07-18-22	07-26-22	06-26-20	06-16-22	06-24-19	07-15-21	Avg	StDev	CV%				46	0.0706605	-0.0766022	-0.0798827
			1	233	332	332	331	278	303	212	377	247	374	283	320	369	261	329	421	349	432	323	380	231	352	232	346	341	338	396	403	267	375	508	331.452	67.2368	0.202856				47	0.0721966	-0.0738805	-0.0792901
			3	374	432	425	449	382	407	357	474	406	495	435	412	469	400	450	521	445	507	453	465	381	453	350	438	450	457	514	508	462	480	588	446.419	52.1464	0.11681				48	0.0737327	-0.0728165	-0.0788364
			5	441	490	480	506	455	481	437	529	480	550	512	485	520	484	527	578	517	556	517	505	464	499	440	499	507	521	566	559	557	529	636	510.548	43.9893	0.0861608				49	0.0752688	-0.0722919	-0.0782514
			10	561	602	572	621	567	577	556	620	618	655	621	593	611	605	618	683	617	634	628	609	594	606	562	586	604	628	678	667	675	645	715	617.032	38.8068	0.0628926				50	0.0768049	-0.0722576	-0.0772261
			15	668	683	653	709	649	669	636	690	694	741	718	669	699	696	695	770	696	703	709	693	680	689	650	671	690	725	766	745	753	736	774	700.613	36.5136	0.0521167				51	0.078341	-0.071744	-0.0770252
			20	762	737	720	778	740	759	702	751	778	823	809	762	780	786	782	838	763	760	803	768	765	762	750	748	768	793	828	822	827	811	828	777.516	33.992	0.0437187				52	0.0798771	-0.0702048	-0.076666
			25	841	797	801	840	806	826	785	819	859	900	884	854	845	885	860	916	848	827	878	855	843	826	824	816	833	865	901	903	908	888	876	851.903	35.4225	0.0415805				53	0.0814132	-0.0698807	-0.0761806
			30	923	861	862	907	890	900	871	888	950	978	982	929	924	961	924	992	930	881	958	929	922	896	919	891	891	943	976	975	987	962	935	927	38.2501	0.0412622				54	0.0829493	-0.066956	-0.0761711
			35	1000	937	940	997	960	986	955	961	1057	1066	1086	1006	1003	1057	995	1082	1012	939	1051	997	994	961	1010	958	981	1029	1067	1045	1088	1039	987	1007.94	45.8468	0.0454858				55	0.0844854	-0.066819	-0.0761397
			40	1102	1010	1017	1076	1043	1055	1043	1032	1148	1147	1188	1110	1098	1158	1081	1159	1098	1003	1150	1084	1095	1052	1093	1041	1068	1130	1152	1127	1173	1122	1054	1093.84	51.1274	0.0467412				56	0.0860215	-0.0666965	-0.0758841
			45	1203	1086	1088	1188	1154	1143	1136	1112	1247	1235	1271	1212	1183	1275	1159	1242	1184	1068	1241	1172	1188	1129	1185	1113	1142	1219	1232	1198	1267	1213	1116	1180.68	57.4145	0.0486284				57	0.0875576	-0.0655657	-0.0737148
			50	1298	1170	1167	1269	1238	1221	1224	1175	1343	1338	1374	1310	1279	1366	1244	1324	1266	1131	1331	1261	1274	1220	1280	1181	1212	1308	1318	1272	1371	1294	1171	1265.48	66.3214	0.0524079				58	0.0890937	-0.0638562	-0.0732606
			55	1420	1247	1250	1370	1320	1296	1327	1253	1447	1445	1484	1419	1375	1476	1324	1426	1360	1197	1428	1370	1365	1310	1372	1261	1288	1406	1409	1356	1475	1393	1241	1358.39	77.8163	0.0572858				59	0.0906298	-0.0638013	-0.0725126
			60	1513	1319	1342	1453	1430	1372	1423	1345	1554	1549	1604	1548	1469	1613	1420	1524	1446	1263	1555	1473	1474	1382	1470	1359	1386	1526	1508	1466	1579	1484	1308	1456.68	91.0631	0.0625143				60	0.0921659	-0.0627426	-0.071951
			65	1635	1385	1430	1539	1554	1453	1500	1434	1659	1647	1724	1681	1577	1733	1513	1618	1551	1328	1644	1564	1573	1471	1609	1449	1500	1618	1604	1575	1677	1571	1387	1554.94	102.487	0.0659108				61	0.093702	-0.0617297	-0.0709915
			70	1751	1464	1527	1653	1661	1556	1629	1526	1772	1771	1838	1804	1695	1855	1610	1735	1654	1389	1751	1651	1658	1556	1727	1528	1596	1728	1704	1652	1811	1666	1453	1657.13	116.841	0.0705078				62	0.0952381	-0.0601412	-0.0704047
			75	1891	1593	1643	1757	1819	1667	1746	1608	1934	1927	1983	1936	1842	2029	1708	1877	1784	1493	1860	1734	1756	1685	1830	1623	1675	1862	1817	1749	1944	1760	1524	1776	134.535	0.0757518				63	0.0967742	-0.0585885	-0.069841
			80	2176	1722	1782	1900	1994	1815	1887	1768	2239	2190	2192	2120	1984	2244	1836	2135	2006	1607	1990	1869	1890	1842	1990	1758	1810	2032	1998	1898	2132	1867	1617	1944.84	174.978	0.0899704				64	0.0983103	-0.0567436	-0.0696641
			85	2707	1959	2024	2133	2431	2164	2169	1962	2725	2657	2665	2549	2388	2798	2006	2556	2402	1785	2229	2080	2094	2133	2291	1962	1994	2465	2436	2071	2573	2063	1794	2266.61	289.929	0.127913				65	0.0998464	-0.0564516	-0.0694358
			90	3458	2452	2531	2660	3117	2701	2820	2546	3536	3410	3561	3315	3084	3694	2570	3354	3075	2236	2930	2627	2645	2597	2981	2484	2521	3226	3091	2624	3487	2639	2129	2906.48	425.405	0.146364				66	0.101382	-0.0561011	-0.0693545
			95	4417	3663	3583	3604	4017	3641	3939	3790	4730	4467	4510	4152	4000	4686	3589	4265	4015	3120	3869	3758	3906	3555	4018	3637	3734	4103	3913	3827	4351	3630	2856	3914.35	415.881	0.106245				67	0.102919	-0.0553673	-0.0675629
																																									68	0.104455	-0.0545499	-0.0662703
																																									69	0.105991	-0.0531384	-0.0655466
	Table 2 Estimated correction error treating the percentile averages of the five lowest Atm-I images as the estimate closest to surface reflectance (standard)																								% error = (value-standard)/standard/standard								These data feed to Table 4, this spreadsheet								70	0.107527	-0.0528434	-0.0654669
			SZA	24.48	23.22	22.54	26.41	24.11	23	27.37	27.86	22.6	22.01	27.44	24.18	21.84	26.48	23.4	23.64	25.75	28.03	22.59	26.9	21.94	21.78	23.33	26.17	25.39	24.23	25.31	22.27	21.76	22.09	23.94							71	0.109063	-0.0526926	-0.064566
			Atm-I	890	891	892	893	898	903	904	908	912	916	932	934	937	942	944	945	950	951	954	957	959	962	973	974	982	994	995	996	1009	1018	1062							72	0.110599	-0.0522288	-0.0608446
			SENSOR	L8	L8	L8	L8	L8	L8	L8	L8	L9	L8	L9	L9	L9	L9	L9	L8	L8	L8	L8	L8	L8	L8	L8	L8	L9	L8	L8	L8	L8	L8	L8							73	0.112135	-0.0521486	-0.0607439
	CMAC	Percentile	Standard	07-19-20	07-09-22	07-01-19	08-02-19	07-17-19	07-06-21	08-07-21	08-10-22	07-01-22	06-23-22	08-11-22	07-17-22	06-15-22	08-02-22	07-10-22	07-12-20	07-28-20	08-11-19	07-02-22	08-04-20	06-20-21	06-13-21	07-10-19	07-31-21	07-26-22	07-18-22	07-26-19	06-26-20	06-16-22	06-24-19	07-15-21							74	0.113671	-0.0513992	-0.060425
		1	372	0.0107527	-0.0322581	0.0134409	0.0645161	-0.0564516	0.0241935	-0.0322581	0.0887097	-0.0134409	0.0510753	-0.00268817	-0.0430108	0.0537634	0.0241935	0.0645161	0.16129	0	0.0591398	0.0349462	0.0752688	0.0860215	0.00806452	0.0403226	-0.0134409	0.0537634	0.0725806	0.102151	0.174731	0.206989	0.244624	0.137097							75	0.115207	-0.0508357	-0.0588052
		3	438.6	-0.0127679	-0.0401277	0.000911993	0.0784314	-0.0264478	0.0214318	-0.0492476	0.0647515	-0.0173279	0.0715914	0.0373917	-0.0310078	0.0237118	0.0214318	0.0373917	0.117191	0.00547196	0.0693114	0.0191518	0.0784314	0.0556316	-0.0218878	0.0510716	-0.0173279	0.0396717	0.0670315	0.0556316	0.142271	0.151391	0.19927	0.0898313							76	0.116743	-0.049966	-0.0569903
		5	488.6	0.00695866	-0.0360213	0.00491199	0.0642652	-0.0401146	0.0151453	-0.0339746	0.0519853	-0.0237413	0.0540319	0.0417519	-0.0298813	0.017192	0.0253786	0.035612	0.107245	-0.0176013	0.0499386	0.0274253	0.0437986	0.0724519	-0.0114613	0.0397053	-0.0278346	0.0519853	0.0704052	0.0642652	0.146132	0.131805	0.197298	0.0499386							77	0.11828	-0.0496859	-0.0563039
		10	588.4	0.0163154	-0.049966	0.0146159	0.0452073	-0.0261727	0.0146159	-0.0278722	0.0316111	0.0265126	0.0707002	0.0757988	-0.0261727	0.0248131	0.0486064	0.0316111	0.0944935	0.00271924	0.00951734	0.0690007	0.0435078	0.0639021	0.00271924	0.0401088	-0.014276	0.00101971	0.0707002	0.0791978	0.116587	0.136982	0.159075	0.00781781							78	0.119816	-0.0492476	-0.0560726
		15	675	0.0148148	-0.0414815	0.00296296	0.0488889	-0.0251852	0.0148148	-0.0266667	0.0192593	0.0266667	0.0637037	0.0814815	-0.0148148	0.0251852	0.0637037	0.0385185	0.0888889	0.00444444	-0.0192593	0.0666667	0.0459259	0.0592593	-0.0237037	0.0444444	-0.0192593	0.0251852	0.0666667	0.0666667	0.0948148	0.108148	0.137778	-0.0325926							79	0.121352	-0.0489802	-0.0559531
		20	751	0.0279627	-0.045273	-0.00532623	0.0359521	-0.0133156	-0.00532623	-0.0332889	0.0106525	0.0292943	0.0625832	0.0932091	-0.00399467	0.0133156	0.0758988	0.0466045	0.0838881	-0.00665779	-0.0292943	0.0612517	0.057257	0.0892144	-0.0252996	0.057257	-0.0173103	0.0213049	0.069241	0.0639148	0.0838881	0.122503	0.138482	-0.0585885							80	0.122888	-0.0486273	-0.0547316
		25	821.4	0.0494278	-0.0601412	-0.0102264	0.0238617	-0.00292184	0.00194789	-0.017531	-0.00535671	0.0518627	0.0689067	0.102995	0.0238617	0.0226443	0.0993426	0.0409058	0.0896031	0.0202094	-0.0406623	0.0701242	0.0579498	0.0749939	-0.0260531	0.0530801	-0.0187485	0.0104699	0.0871682	0.0603847	0.0908206	0.130996	0.139518	-0.0698807							81	0.124424	-0.0472114	-0.0541344
		30	893.6	0.0519248	-0.0666965	-0.00402865	0.0172337	0.0015667	-0.000671441	0.0015667	-0.0107431	0.0631155	0.0832587	0.114593	0.0317816	0.0273053	0.11795	0.039615	0.0922113	0.0317816	-0.0521486	0.0989257	0.0575201	0.0597583	-0.0152193	0.070949	-0.0118621	0.00380483	0.0843778	0.0687108	0.0854969	0.133617	0.131379	-0.0722919							82	0.12596	-0.0465797	-0.0540336
		35	967.8	0.0580698	-0.0638562	-0.021492	0.0219054	0.00537301	-0.00185989	0.00123993	-0.0121926	0.0818351	0.0735689	0.135565	0.0456706	0.0384377	0.142798	0.028105	0.106634	0.0229386	-0.066956	0.0932011	0.0673693	0.0560033	-0.0152924	0.0797685	-0.0194255	0.0105394	0.0859682	0.0849349	0.0797685	0.146931	0.128332	-0.0865881							83	0.127496	-0.0464515	-0.0528798
		40	1054.8	0.0618127	-0.0766022	-0.0291998	0.0352673	0.00872203	0.000189609	-0.00929086	-0.0282518	0.0836177	0.0845658	0.140501	0.0608646	0.0362154	0.151877	0.0210466	0.0978385	0.0295791	-0.0813424	0.110163	0.0608646	0.0703451	-0.0225635	0.0760334	-0.0168752	-0.000758438	0.0940463	0.0874099	0.0656049	0.137656	0.116799	-0.0993553							84	0.129032	-0.045654	-0.0523369
		45	1147.8	0.0585468	-0.0738805	-0.0355463	0.0341523	0.0167277	-0.012023	-0.00853807	-0.0294476	0.0890399	0.085555	0.132601	0.070744	0.0332811	0.151769	0.0210838	0.0881687	0.0263112	-0.0991462	0.111692	0.0602892	0.0637742	-0.0259627	0.0829413	-0.03816	-0.00331068	0.0803276	0.0768427	0.0559331	0.14567	0.110821	-0.119185							85	0.130568	-0.045273	-0.0523369
		50	1239.8	0.0695273	-0.0772705	-0.0361349	0.0332312	0.0106469	-0.00629134	-0.00306501	-0.0337151	0.0993709	0.0800129	0.134054	0.0711405	0.0340377	0.156638	0.0211324	0.0792063	0.0275851	-0.103888	0.107437	0.0550089	0.0558155	-0.0191966	0.0929182	-0.0385546	-0.00145185	0.0816261	0.0679142	0.0590418	0.1397	0.101791	-0.126472							86	0.132104	-0.0431755	-0.0522592
		55	1334.8	0.0765658	-0.0822595	-0.0403057	0.0211268	0.0248726	-0.0110878	0.00239736	-0.0403057	0.0930476	0.0908001	0.149236	0.0795625	0.0421037	0.175457	0.0181301	0.08181	0.030866	-0.115972	0.121516	0.0638298	0.0623314	-0.0215763	0.0848067	-0.0380581	-0.00659275	0.0922985	0.0698232	0.0600839	0.146239	0.107282	-0.130956							87	0.133641	-0.0430108	-0.0521203
		60	1436	0.0703343	-0.0849582	-0.0306407	0.0181058	0.0271588	-0.0236769	0.00557103	-0.0508357	0.0933148	0.0926184	0.1539	0.104457	0.0383008	0.18663	0.0174095	0.0842618	0.031337	-0.124652	0.114206	0.0564067	0.066156	-0.0153203	0.0926184	-0.0431755	-0.00208914	0.100279	0.066156	0.0557103	0.139972	0.0940111	-0.140669							88	0.135177	-0.0429848	-0.0521013
		65	1540.4	0.0789405	-0.0963386	-0.0353155	0.0250584	0.0276552	-0.040509	0.0114256	-0.0528434	0.0860815	0.0730979	0.147105	0.0964684	0.0328486	0.185406	0.0120748	0.0711504	0.0231109	-0.132693	0.112049	0.0633602	0.0529733	-0.0288237	0.109452	-0.0385614	0.0042846	0.0951701	0.0542716	0.0601143	0.135419	0.101662	-0.146326							89	0.136713	-0.0425198	-0.0517633
		70	1635.2	0.084271	-0.0924658	-0.0386497	0.0194472	0.0273973	-0.0343689	0.0157779	-0.0545499	0.103841	0.0854941	0.156433	0.105064	0.0414628	0.194349	0.0053816	0.0848826	0.0310665	-0.140166	0.102006	0.0543053	0.0610323	-0.0343689	0.108733	-0.0472114	-0.00256849	0.100171	0.0695939	0.0494129	0.149095	0.0946673	-0.140778							90	0.138249	-0.0415478	-0.0516385
		75	1751	0.0936608	-0.0959452	-0.0513992	0.0131354	0.0405483	-0.0399772	0.0142776	-0.066819	0.111936	0.0982296	0.151913	0.106225	0.0416905	0.194746	-0.0011422	0.0873786	0.0348372	-0.146773	0.0942319	0.0376927	0.0434038	-0.027984	0.100514	-0.0496859	-0.0137065	0.0982296	0.0605368	0.0342661	0.150771	0.07253	-0.1502							91	0.139785	-0.0414815	-0.0505333
		80	1914.4	0.13247	-0.109382	-0.0561011	-0.00595487	0.0389678	-0.045654	-0.00282073	-0.0728165	0.183661	0.144484	0.157543	0.0985165	0.0353113	0.186272	-0.0211032	0.128291	0.050982	-0.159528	0.0635186	0.0222524	0.0206853	-0.0289386	0.0865023	-0.0702048	-0.0425198	0.0818011	0.0462808	0.01285	0.135604	0.050982	-0.175198							92	0.141321	-0.0406623	-0.0502489
		85	2243.2	0.207204	-0.144971	-0.0834522	-0.0531384	0.0743581	-0.0415478	-0.00766762	-0.123128	0.211662	0.186252	0.209879	0.13766	0.0774786	0.25535	-0.0919223	0.156384	0.0774786	-0.191334	0.0128388	-0.0526926	-0.0335235	-0.0464515	0.0342368	-0.123128	-0.107971	0.128745	0.10066	-0.0553673	0.192939	-0.0139087	-0.206491							93	0.142857	-0.040509	-0.0501477
		90	2833.8	0.217799	-0.140377	-0.106147	-0.0655657	0.0942904	-0.0486273	-0.0129861	-0.107912	0.252735	0.214976	0.260498	0.178277	0.101701	0.310608	-0.0955607	0.216035	0.105583	-0.203543	0.044181	-0.0567436	-0.0627426	-0.0638013	0.0628838	-0.118145	-0.0983838	0.167337	0.114405	-0.0489802	0.271085	-0.0225139	-0.238831							94	0.144393	-0.0403057	-0.0499837
		95	3894.4	0.150883	-0.0465797	-0.0812449	-0.0722576	0.0491988	-0.0617297	0.0230074	-0.0116578	0.25	0.181697	0.174507	0.0949055	0.0530505	0.223809	-0.071744	0.131368	0.0646056	-0.180875	0.0186422	-0.016023	0.0160744	-0.0522288	0.0481717	-0.0429848	-0.011401	0.0923377	0.0402116	0.0173583	0.173737	-0.0316865	-0.236083							95	0.145929	-0.0403057	-0.0494498
	LaSRC	Percentile	Standard	07-19-20	07-09-22	07-01-19	08-02-19	07-17-19	07-06-21	08-07-21	08-10-22	07-01-22	06-23-22	08-11-22	07-17-22	06-15-22	08-02-22	07-10-22	07-12-20	07-28-20	08-11-19	07-02-22	08-04-20	06-20-21	06-13-21	07-10-19	07-31-21	07-26-22	07-18-22	07-26-19	06-26-20	06-16-22	06-24-19	07-15-21							96	0.147465	-0.0401277	-0.049171
		1	301.2	-0.226428	0.102258	0.102258	0.0989376	-0.0770252	0.0059761	-0.296149	0.25166	-0.179947	0.2417	-0.060425	0.062417	0.2251	-0.133466	0.0922975	0.397742	0.158699	0.434263	0.0723772	0.26162	-0.233068	0.168659	-0.229748	0.148738	0.132138	0.122178	0.314741	0.337981	-0.113546	0.24502	0.686587							97	0.149002	-0.0401146	-0.0489223
		3	412.4	-0.0931135	0.0475267	0.0305529	0.0887488	-0.0737148	-0.0130941	-0.134336	0.14937	-0.0155189	0.200291	0.0548012	-0.000969932	0.137245	-0.0300679	0.0911736	0.263337	0.0790495	0.229389	0.0984481	0.127546	-0.0761397	0.0984481	-0.151309	0.0620757	0.0911736	0.108147	0.246363	0.231814	0.120272	0.163919	0.4258							98	0.150538	-0.0399772	-0.0487848
		5	474.4	-0.0704047	0.0328836	0.0118044	0.0666105	-0.0408938	0.0139123	-0.0788364	0.115093	0.0118044	0.159359	0.079258	0.022344	0.0961214	0.0202361	0.110877	0.218381	0.0897976	0.172007	0.0897976	0.0645025	-0.0219224	0.051855	-0.0725126	0.051855	0.0687184	0.0982293	0.193086	0.178331	0.174115	0.115093	0.340641							99	0.152074	-0.0386497	-0.0475415
		10	584.6	-0.0403695	0.0297639	-0.0215532	0.0622648	-0.0301061	-0.0130003	-0.0489223	0.0605542	0.0571331	0.120424	0.0622648	0.0143688	0.0451591	0.0348957	0.0571331	0.16832	0.0554225	0.0845022	0.0742388	0.0417379	0.0160794	0.0366062	-0.0386589	0.0023948	0.0331851	0.0742388	0.159767	0.140951	0.154636	0.103319	0.223059							100	0.15361	-0.0385614	-0.0470455
		15	672.4	-0.00654372	0.0157644	-0.0288519	0.0544319	-0.0348007	-0.00505651	-0.0541344	0.0261749	0.0321237	0.102023	0.0678168	-0.00505651	0.0395598	0.0350982	0.0336109	0.145152	0.0350982	0.0455086	0.0544319	0.0306365	0.0113028	0.0246877	-0.0333135	-0.00208209	0.0261749	0.0782272	0.139203	0.107971	0.119869	0.0945866	0.151101							101	0.155146	-0.0385546	-0.0467275
		20	747.4	0.0195344	-0.0139149	-0.0366604	0.0409419	-0.00990099	0.0155205	-0.0607439	0.0048167	0.0409419	0.101151	0.0824191	0.0195344	0.0436179	0.0516457	0.0462938	0.12122	0.0208724	0.0168584	0.0743912	0.0275622	0.0235483	0.0195344	0.00347873	0.000802783	0.0275622	0.0610115	0.107841	0.0998127	0.106503	0.085095	0.107841							102	0.156682	-0.03816	-0.0457091
		25	817	0.0293758	-0.0244798	-0.0195838	0.0281518	-0.0134639	0.0110159	-0.0391677	0.00244798	0.0514076	0.101591	0.0820073	0.0452876	0.0342717	0.0832313	0.0526316	0.121175	0.0379437	0.0122399	0.0746634	0.0465116	0.0318237	0.0110159	0.00856793	-0.00122399	0.0195838	0.0587515	0.102815	0.105263	0.111383	0.0869033	0.0722154							103	0.158218	-0.0380581	-0.0443979
		30	888.6	0.0387126	-0.0310601	-0.0299347	0.0207067	0.00157551	0.0128292	-0.0198064	-0.000675219	0.0690975	0.100608	0.105109	0.0454648	0.0398379	0.0814765	0.0398379	0.116363	0.0465901	-0.00855278	0.0781004	0.0454648	0.0375872	0.00832771	0.0342111	0.00270088	0.00270088	0.0612199	0.098357	0.0972316	0.110736	0.0826018	0.052217							104	0.159754	-0.0361349	-0.0434712
		35	966.8	0.0343401	-0.0308233	-0.0277203	0.0312371	-0.00703351	0.0198593	-0.0122052	-0.00599917	0.0932975	0.102607	0.123293	0.0405461	0.0374431	0.0932975	0.0291684	0.119156	0.0467522	-0.0287547	0.0870914	0.0312371	0.0281341	-0.00599917	0.0446835	-0.00910219	0.0146876	0.064336	0.103641	0.0808854	0.125362	0.0746794	0.0208937							105	0.16129	-0.0360213	-0.0422843
		40	1049.6	0.0499238	-0.0377287	-0.0310595	0.0251524	-0.00628811	0.00514482	-0.00628811	-0.0167683	0.09375	0.0927973	0.13186	0.0575457	0.0461128	0.103277	0.0299162	0.10423	0.0461128	-0.0443979	0.0956555	0.0327744	0.0432546	0.00228659	0.0413491	-0.0081936	0.0175305	0.0766006	0.097561	0.0737424	0.117569	0.0689787	0.00419207							106	0.162826	-0.0355463	-0.0411531
		45	1143.8	0.0517573	-0.0505333	-0.0487848	0.0386431	0.00891764	-0.000699423	-0.00681937	-0.0278021	0.0902256	0.0797342	0.111208	0.0596258	0.0342717	0.114705	0.013289	0.0858542	0.035146	-0.0662703	0.0849799	0.0246547	0.0386431	-0.0129393	0.0360203	-0.0269278	-0.0015737	0.0657458	0.0771114	0.0473859	0.107711	0.0605001	-0.0243049							107	0.164363	-0.0353155	-0.0408938
		50	1228.4	0.0566591	-0.0475415	-0.0499837	0.0330511	0.00781504	-0.0060241	-0.0035819	-0.0434712	0.0932921	0.0892218	0.118528	0.0664279	0.0411918	0.112016	0.0126994	0.0778248	0.0306089	-0.0792901	0.0835233	0.0265386	0.0371215	-0.00683816	0.0420059	-0.0385868	-0.0133507	0.0647997	0.0729404	0.0354933	0.116086	0.0534028	-0.0467275							108	0.165899	-0.0343689	-0.0403695
		55	1321.4	0.0746178	-0.0563039	-0.0540336	0.0367792	-0.00105948	-0.019222	0.00423793	-0.0517633	0.0950507	0.0935372	0.123051	0.0738611	0.040563	0.116997	0.00196761	0.0791585	0.0292114	-0.0941426	0.080672	0.0367792	0.0329953	-0.00862721	0.0382927	-0.0457091	-0.0252762	0.064023	0.0662933	0.0261843	0.11624	0.054185	-0.0608446							109	0.167435	-0.0343689	-0.0395068
		60	1411.4	0.0719853	-0.0654669	-0.049171	0.0294743	0.0131784	-0.0279155	0.00821879	-0.0470455	0.101034	0.0974919	0.13646	0.0967833	0.0408105	0.142837	0.00609324	0.0797789	0.0245147	-0.105144	0.101743	0.0436446	0.0443531	-0.0208304	0.0415191	-0.0371263	-0.0179963	0.081196	0.0684427	0.038685	0.118747	0.0514383	-0.0732606							110	0.168971	-0.0339746	-0.0391677
		65	1508.6	0.0837863	-0.0819303	-0.0521013	0.0201511	0.0300941	-0.0368554	-0.00570065	-0.0494498	0.0996951	0.0917407	0.142781	0.114278	0.0453401	0.148747	0.00291661	0.0725176	0.0281055	-0.119714	0.0897521	0.0367228	0.0426886	-0.0249238	0.0665518	-0.0395068	-0.00570065	0.0725176	0.0632374	0.0440143	0.111627	0.0413629	-0.0806045							111	0.170507	-0.0337151	-0.0386589
		70	1611.2	0.0867676	-0.0913605	-0.0522592	0.0259434	0.0309086	-0.0342602	0.0110477	-0.0528798	0.0998014	0.0991807	0.140765	0.119662	0.0520109	0.151316	-0.000744786	0.0768371	0.0265641	-0.13791	0.0867676	0.0247021	0.0290467	-0.0342602	0.0718719	-0.0516385	-0.00943396	0.0724926	0.0575968	0.0253227	0.124007	0.0340119	-0.0981877							112	0.172043	-0.0335235	-0.0385868
		75	1740.6	0.086407	-0.0847983	-0.0560726	0.00942204	0.0450419	-0.0422843	0.00310238	-0.0761806	0.111111	0.10709	0.139262	0.11226	0.0582558	0.16569	-0.0187292	0.0783638	0.0249339	-0.14225	0.068597	-0.0037918	0.00884752	-0.031943	0.0513616	-0.0675629	-0.0376882	0.0697461	0.0438929	0.00482592	0.116856	0.0111456	-0.12444							113	0.173579	-0.0332889	-0.0385641
		80	1914.8	0.136411	-0.100689	-0.0693545	-0.00772927	0.041362	-0.0521203	-0.0145185	-0.076666	0.169313	0.143723	0.144767	0.107165	0.0361395	0.171924	-0.0411531	0.114999	0.047629	-0.160748	0.039273	-0.0239189	-0.0129517	-0.0380196	0.039273	-0.0818884	-0.0547316	0.0612074	0.043451	-0.00877376	0.113432	-0.0249634	-0.155525							114	0.175115	-0.0325926	-0.0380196
		85	2250.8	0.202683	-0.129643	-0.100764	-0.0523369	0.0800604	-0.0385641	-0.0363426	-0.12831	0.210681	0.180469	0.184023	0.132486	0.0609561	0.243114	-0.108761	0.135596	0.0671761	-0.206949	-0.00968545	-0.0758841	-0.0696641	-0.0523369	0.0178603	-0.12831	-0.114093	0.0951662	0.0822819	-0.0798827	0.143149	-0.083437	-0.20295							115	0.176651	-0.0322581	-0.0377287
		90	2843.6	0.216064	-0.137713	-0.109931	-0.064566	0.0961457	-0.0501477	-0.00829934	-0.104656	0.243494	0.199184	0.252286	0.165776	0.0845407	0.299058	-0.0962161	0.179491	0.0813757	-0.213673	0.030384	-0.0761711	-0.069841	-0.0867211	0.048319	-0.126459	-0.113448	0.134477	0.0870024	-0.0772261	0.226262	-0.071951	-0.251301							116	0.178187	-0.0322581	-0.0376882
		95	3856.8	0.14525	-0.0502489	-0.0709915	-0.0655466	0.041537	-0.0559531	0.021313	-0.0173201	0.226405	0.158214	0.169363	0.0765401	0.0371292	0.214997	-0.0694358	0.105839	0.0410185	-0.191039	0.00316324	-0.0256171	0.0127567	-0.0782514	0.0417963	-0.0569903	-0.0318399	0.0638353	0.0145717	-0.00772661	0.128137	-0.0588052	-0.25949							117	0.179724	-0.0316865	-0.0371263
																																									118	0.18126	-0.0310078	-0.0368554
																																									119	0.182796	-0.0306407	-0.0366604
	Table 3		Rochester		Blue Band 2			Copied values from the Error Table above converted to absolute values that are then averaged														These data feed to "a -Low refl% Error Distr L8.xlsx"																			120	0.184332	-0.0298813	-0.0363426
																																									121	0.185868	-0.0294476	-0.0348007
			Cum. %	890	891	892	893	898	903	904	908	912	916	932	934	937	942	944	945	950	951	954	957	959	962	973	974	982	994	995	996	1009	1018	1062	<-- Image Atm-I						122	0.187404	-0.0292943	-0.0342602
	CMAC		1	0.0107527	-0.0322581	0.0134409	0.0645161	-0.0564516	0.0241935	-0.0322581	0.0887097	-0.0134409	0.0510753	-0.00268817	-0.0430108	0.0537634	0.0241935	0.0645161	0.16129	0	0.0591398	0.0349462	0.0752688	0.0860215	0.00806452	0.0403226	-0.0134409	0.0537634	0.0725806	0.102151	0.174731	0.206989	0.244624	0.137097							123	0.18894	-0.0291998	-0.0342602
			3	-0.0127679	-0.0401277	0.000911993	0.0784314	-0.0264478	0.0214318	-0.0492476	0.0647515	-0.0173279	0.0715914	0.0373917	-0.0310078	0.0237118	0.0214318	0.0373917	0.117191	0.00547196	0.0693114	0.0191518	0.0784314	0.0556316	-0.0218878	0.0510716	-0.0173279	0.0396717	0.0670315	0.0556316	0.142271	0.151391	0.19927	0.0898313							124	0.190476	-0.0289386	-0.0333135
			5	0.00695866	-0.0360213	0.00491199	0.0642652	-0.0401146	0.0151453	-0.0339746	0.0519853	-0.0237413	0.0540319	0.0417519	-0.0298813	0.017192	0.0253786	0.035612	0.107245	-0.0176013	0.0499386	0.0274253	0.0437986	0.0724519	-0.0114613	0.0397053	-0.0278346	0.0519853	0.0704052	0.0642652	0.146132	0.131805	0.197298	0.0499386							125	0.192012	-0.0288237	-0.031943
			10	0.0163154	-0.049966	0.0146159	0.0452073	-0.0261727	0.0146159	-0.0278722	0.0316111	0.0265126	0.0707002	0.0757988	-0.0261727	0.0248131	0.0486064	0.0316111	0.0944935	0.00271924	0.00951734	0.0690007	0.0435078	0.0639021	0.00271924	0.0401088	-0.014276	0.00101971	0.0707002	0.0791978	0.116587	0.136982	0.159075	0.00781781							126	0.193548	-0.0282518	-0.0318399
			15	0.0148148	-0.0414815	0.00296296	0.0488889	-0.0251852	0.0148148	-0.0266667	0.0192593	0.0266667	0.0637037	0.0814815	-0.0148148	0.0251852	0.0637037	0.0385185	0.0888889	0.00444444	-0.0192593	0.0666667	0.0459259	0.0592593	-0.0237037	0.0444444	-0.0192593	0.0251852	0.0666667	0.0666667	0.0948148	0.108148	0.137778	-0.0325926							127	0.195084	-0.027984	-0.0310601
			20	0.0279627	-0.045273	-0.00532623	0.0359521	-0.0133156	-0.00532623	-0.0332889	0.0106525	0.0292943	0.0625832	0.0932091	-0.00399467	0.0133156	0.0758988	0.0466045	0.0838881	-0.00665779	-0.0292943	0.0612517	0.057257	0.0892144	-0.0252996	0.057257	-0.0173103	0.0213049	0.069241	0.0639148	0.0838881	0.122503	0.138482	-0.0585885							128	0.196621	-0.0278722	-0.0310595
			Avg Abs.Value of Error --->	0.0149287	0.0408546	0.00702832	0.0562102	0.0312812	0.0159213	0.0338847	0.0444949	0.0228306	0.062281	0.0553869	0.0248137	0.0263302	0.0432022	0.0423757	0.108833	0.00614912	0.0394101	0.0464071	0.0573649	0.0710801	0.0155227	0.0454849	0.0182415	0.032155	0.0694375	0.0719711	0.126404	0.14297	0.179421	0.0626443							129	0.198157	-0.0278346	-0.0308233
																																									130	0.199693	-0.0266667	-0.0301061
																																									131	0.201229	-0.0264478	-0.0300679
				890	891	892	893	898	903	904	908	912	916	932	934	937	942	944	945	950	951	954	957	959	962	973	974	982	994	995	996	1009	1018	1062	<-- Image Atm-I						132	0.202765	-0.0261727	-0.0299347
	LaSRC		1	-0.226428	0.102258	0.102258	0.0989376	-0.0770252	0.0059761	-0.296149	0.25166	-0.179947	0.2417	-0.060425	0.062417	0.2251	-0.133466	0.0922975	0.397742	0.158699	0.434263	0.0723772	0.26162	-0.233068	0.168659	-0.229748	0.148738	0.132138	0.122178	0.314741	0.337981	-0.113546	0.24502	0.686587							133	0.204301	-0.0261727	-0.0288519
			3	-0.0931135	0.0475267	0.0305529	0.0887488	-0.0737148	-0.0130941	-0.134336	0.14937	-0.0155189	0.200291	0.0548012	-0.000969932	0.137245	-0.0300679	0.0911736	0.263337	0.0790495	0.229389	0.0984481	0.127546	-0.0761397	0.0984481	-0.151309	0.0620757	0.0911736	0.108147	0.246363	0.231814	0.120272	0.163919	0.4258							134	0.205837	-0.0260531	-0.0287547
			5	-0.0704047	0.0328836	0.0118044	0.0666105	-0.0408938	0.0139123	-0.0788364	0.115093	0.0118044	0.159359	0.079258	0.022344	0.0961214	0.0202361	0.110877	0.218381	0.0897976	0.172007	0.0897976	0.0645025	-0.0219224	0.051855	-0.0725126	0.051855	0.0687184	0.0982293	0.193086	0.178331	0.174115	0.115093	0.340641							135	0.207373	-0.0259627	-0.0279155
			10	-0.0403695	0.0297639	-0.0215532	0.0622648	-0.0301061	-0.0130003	-0.0489223	0.0605542	0.0571331	0.120424	0.0622648	0.0143688	0.0451591	0.0348957	0.0571331	0.16832	0.0554225	0.0845022	0.0742388	0.0417379	0.0160794	0.0366062	-0.0386589	0.0023948	0.0331851	0.0742388	0.159767	0.140951	0.154636	0.103319	0.223059							136	0.208909	-0.0252996	-0.0278021
			15	-0.00654372	0.0157644	-0.0288519	0.0544319	-0.0348007	-0.00505651	-0.0541344	0.0261749	0.0321237	0.102023	0.0678168	-0.00505651	0.0395598	0.0350982	0.0336109	0.145152	0.0350982	0.0455086	0.0544319	0.0306365	0.0113028	0.0246877	-0.0333135	-0.00208209	0.0261749	0.0782272	0.139203	0.107971	0.119869	0.0945866	0.151101							137	0.210445	-0.0251852	-0.0277203
			20	0.0195344	-0.0139149	-0.0366604	0.0409419	-0.00990099	0.0155205	-0.0607439	0.0048167	0.0409419	0.101151	0.0824191	0.0195344	0.0436179	0.0516457	0.0462938	0.12122	0.0208724	0.0168584	0.0743912	0.0275622	0.0235483	0.0195344	0.00347873	0.000802783	0.0275622	0.0610115	0.107841	0.0998127	0.106503	0.085095	0.107841							138	0.211982	-0.0237413	-0.0269278
			Avg Abs.Value of Error --->	0.0760656	0.0403519	0.0386134	0.0686559	0.0444069	0.0110933	0.112187	0.101278	0.0562448	0.154158	0.0678308	0.0207818	0.0978005	0.0509016	0.0718976	0.219025	0.0731564	0.163755	0.0772808	0.0922676	0.0636767	0.0666317	0.0881701	0.0446581	0.0631587	0.0903387	0.1935	0.18281	0.13149	0.134505	0.322505							139	0.213518	-0.0237037	-0.0256171
																																									140	0.215054	-0.0236769	-0.0252762
																																									141	0.21659	-0.0225635	-0.0249634
																																									142	0.218126	-0.0225139	-0.0249238
																																									143	0.219662	-0.0218878	-0.0244798
																																									144	0.221198	-0.0215763	-0.0243049
																																									145	0.222734	-0.021492	-0.0239189
																																									146	0.22427	-0.0211032	-0.0219224
																																									147	0.225806	-0.0194255	-0.0215532
																																									148	0.227343	-0.0192593	-0.0208304
																																									149	0.228879	-0.0192593	-0.0198064
																																									150	0.230415	-0.0191966	-0.0195838
																																									151	0.231951	-0.0187485	-0.019222
																																									152	0.233487	-0.0176013	-0.0187292
																																									153	0.235023	-0.017531	-0.0179963
																																									154	0.236559	-0.0173279	-0.0173201
																																									155	0.238095	-0.0173279	-0.0167683
																																									156	0.239631	-0.0173103	-0.0155189
																																									157	0.241167	-0.0168752	-0.0145185
																																									158	0.242704	-0.016023	-0.0139149
																																									159	0.24424	-0.0153203	-0.0134639
																																									160	0.245776	-0.0152924	-0.0133507
																																									161	0.247312	-0.0152193	-0.0130941
																																									162	0.248848	-0.0148148	-0.0130003
																																									163	0.250384	-0.014276	-0.0129517
																																									164	0.25192	-0.0139087	-0.0129393
																																									165	0.253456	-0.0137065	-0.0122052
																																									166	0.254992	-0.0134409	-0.00990099
																																									167	0.256528	-0.0134409	-0.00968545
																																									168	0.258065	-0.0133156	-0.00943396
																																									169	0.259601	-0.0129861	-0.00910219
																																									170	0.261137	-0.0127679	-0.00877376
																																									171	0.262673	-0.0121926	-0.00862721
																																									172	0.264209	-0.012023	-0.00855278
																																									173	0.265745	-0.0118621	-0.00829934
																																									174	0.267281	-0.0116578	-0.0081936
																																									175	0.268817	-0.0114613	-0.00772927
																																									176	0.270353	-0.011401	-0.00772661
																																									177	0.271889	-0.0110878	-0.00703351
																																									178	0.273425	-0.0107431	-0.00683816
																																									179	0.274962	-0.0102264	-0.00681937
																																									180	0.276498	-0.00929086	-0.00654372
																																									181	0.278034	-0.00853807	-0.00628811
																																									182	0.27957	-0.00766762	-0.00628811
																																									183	0.281106	-0.00665779	-0.0060241
																																									184	0.282642	-0.00659275	-0.00599917
																																									185	0.284178	-0.00629134	-0.00599917
																																									186	0.285714	-0.00595487	-0.00570065
																																									187	0.28725	-0.00535671	-0.00570065
																																									188	0.288786	-0.00532623	-0.00505651
																																									189	0.290323	-0.00532623	-0.00505651
																																									190	0.291859	-0.00402865	-0.0037918
																																									191	0.293395	-0.00399467	-0.0035819
																																									192	0.294931	-0.00331068	-0.00208209
																																									193	0.296467	-0.00306501	-0.0015737
																																									194	0.298003	-0.00292184	-0.00122399
																																									195	0.299539	-0.00282073	-0.00105948
																																									196	0.301075	-0.00268817	-0.000969932
																																									197	0.302611	-0.00256849	-0.000744786
																																									198	0.304147	-0.00208914	-0.000699423
																																									199	0.305684	-0.00185989	-0.000675219
																																									200	0.30722	-0.00145185	0.000802783
																																									201	0.308756	-0.0011422	0.00157551
																																									202	0.310292	-0.000758438	0.00196761
																																									203	0.311828	-0.000671441	0.00228659
																																									204	0.313364	0	0.0023948
																																									205	0.3149	0.000189609	0.00244798
																																									206	0.316436	0.000911993	0.00270088
																																									207	0.317972	0.00101971	0.00270088
																																									208	0.319508	0.00123993	0.00291661
																																									209	0.321045	0.0015667	0.00310238
																																									210	0.322581	0.0015667	0.00316324
																																									211	0.324117	0.00194789	0.00347873
																																									212	0.325653	0.00239736	0.00419207
																																									213	0.327189	0.00271924	0.00423793
																																									214	0.328725	0.00271924	0.0048167
																																									215	0.330261	0.00296296	0.00482592
																																									216	0.331797	0.00380483	0.00514482
																																									217	0.333333	0.0042846	0.0059761
																																									218	0.334869	0.00444444	0.00609324
																																									219	0.336406	0.00491199	0.00781504
																																									220	0.337942	0.00537301	0.00821879
																																									221	0.339478	0.0053816	0.00832771
																																									222	0.341014	0.00547196	0.00856793
																																									223	0.34255	0.00557103	0.00884752
																																									224	0.344086	0.00695866	0.00891764
																																									225	0.345622	0.00781781	0.00942204
																																									226	0.347158	0.00806452	0.0110159
																																									227	0.348694	0.00872203	0.0110159
																																									228	0.35023	0.00951734	0.0110477
																																									229	0.351767	0.0104699	0.0111456
																																									230	0.353303	0.0105394	0.0113028
																																									231	0.354839	0.0106469	0.0118044
																																									232	0.356375	0.0106525	0.0118044
																																									233	0.357911	0.0107527	0.0122399
																																									234	0.359447	0.0114256	0.0126994
																																									235	0.360983	0.0120748	0.0127567
																																									236	0.362519	0.0128388	0.0128292
																																									237	0.364055	0.01285	0.0131784
																																									238	0.365591	0.0131354	0.013289
																																									239	0.367127	0.0133156	0.0139123
																																									240	0.368664	0.0134409	0.0143688
																																									241	0.3702	0.0142776	0.0145717
																																									242	0.371736	0.0146159	0.0146876
																																									243	0.373272	0.0146159	0.0155205
																																									244	0.374808	0.0148148	0.0157644
																																									245	0.376344	0.0148148	0.0160794
																																									246	0.37788	0.0151453	0.0168584
																																									247	0.379416	0.0157779	0.0175305
																																									248	0.380952	0.0160744	0.0178603
																																									249	0.382488	0.0163154	0.0195344
																																									250	0.384025	0.0167277	0.0195344
																																									251	0.385561	0.017192	0.0195344
																																									252	0.387097	0.0172337	0.0195838
																																									253	0.388633	0.0173583	0.0198593
																																									254	0.390169	0.0174095	0.0201511
																																									255	0.391705	0.0181058	0.0202361
																																									256	0.393241	0.0181301	0.0207067
																																									257	0.394777	0.0186422	0.0208724
																																									258	0.396313	0.0191518	0.0208937
																																									259	0.397849	0.0192593	0.021313
																																									260	0.399386	0.0194472	0.022344
																																									261	0.400922	0.0202094	0.0235483
																																									262	0.402458	0.0206853	0.0245147
																																									263	0.403994	0.0210466	0.0246547
																																									264	0.40553	0.0210838	0.0246877
																																									265	0.407066	0.0211268	0.0247021
																																									266	0.408602	0.0211324	0.0249339
																																									267	0.410138	0.0213049	0.0251524
																																									268	0.411674	0.0214318	0.0253227
																																									269	0.41321	0.0214318	0.0259434
																																									270	0.414747	0.0219054	0.0261749
																																									271	0.416283	0.0222524	0.0261749
																																									272	0.417819	0.0226443	0.0261843
																																									273	0.419355	0.0229386	0.0265386
																																									274	0.420891	0.0230074	0.0265641
																																									275	0.422427	0.0231109	0.0275622
																																									276	0.423963	0.0237118	0.0275622
																																									277	0.425499	0.0238617	0.0281055
																																									278	0.427035	0.0238617	0.0281341
																																									279	0.428571	0.0241935	0.0281518
																																									280	0.430108	0.0241935	0.0290467
																																									281	0.431644	0.0248131	0.0291684
																																									282	0.43318	0.0248726	0.0292114
																																									283	0.434716	0.0250584	0.0293758
																																									284	0.436252	0.0251852	0.0294743
																																									285	0.437788	0.0251852	0.0297639
																																									286	0.439324	0.0253786	0.0299162
																																									287	0.44086	0.0263112	0.0300941
																																									288	0.442396	0.0265126	0.030384
																																									289	0.443932	0.0266667	0.0305529
																																									290	0.445469	0.0271588	0.0306089
																																									291	0.447005	0.0273053	0.0306365
																																									292	0.448541	0.0273973	0.0309086
																																									293	0.450077	0.0274253	0.0312371
																																									294	0.451613	0.0275851	0.0312371
																																									295	0.453149	0.0276552	0.0318237
																																									296	0.454685	0.0279627	0.0321237
																																									297	0.456221	0.028105	0.0327744
																																									298	0.457757	0.0292943	0.0328836
																																									299	0.459293	0.0295791	0.0329953
																																									300	0.460829	0.030866	0.0330511
																																									301	0.462366	0.0310665	0.0331851
																																									302	0.463902	0.031337	0.0336109
																																									303	0.465438	0.0316111	0.0340119
																																									304	0.466974	0.0316111	0.0342111
																																									305	0.46851	0.0317816	0.0342717
																																									306	0.470046	0.0317816	0.0342717
																																									307	0.471582	0.0328486	0.0343401
																																									308	0.473118	0.0332312	0.0348957
																																									309	0.474654	0.0332811	0.0350982
																																									310	0.47619	0.0340377	0.0350982
																																									311	0.477727	0.0341523	0.035146
																																									312	0.479263	0.0342368	0.0354933
																																									313	0.480799	0.0342661	0.0360203
																																									314	0.482335	0.0348372	0.0361395
																																									315	0.483871	0.0349462	0.0366062
																																									316	0.485407	0.0352673	0.0367228
																																									317	0.486943	0.0353113	0.0367792
																																									318	0.488479	0.035612	0.0367792
																																									319	0.490015	0.0359521	0.0371215
																																									320	0.491551	0.0362154	0.0371292
																																									321	0.493088	0.0373917	0.0374431
																																									322	0.494624	0.0373917	0.0375872
																																									323	0.49616	0.0376927	0.0379437
																																									324	0.497696	0.0383008	0.0382927
																																									325	0.499232	0.0384377	0.0386431
																																									326	0.500768	0.0385185	0.0386431
																																									327	0.502304	0.0389678	0.038685
																																									328	0.50384	0.039615	0.0387126
																																									329	0.505376	0.0396717	0.039273
																																									330	0.506912	0.0397053	0.039273
																																									331	0.508449	0.0401088	0.0395598
																																									332	0.509985	0.0402116	0.0398379
																																									333	0.511521	0.0403226	0.0398379
																																									334	0.513057	0.0405483	0.0405461
																																									335	0.514593	0.0409058	0.040563
																																									336	0.516129	0.0414628	0.0408105
																																									337	0.517665	0.0416905	0.0409419
																																									338	0.519201	0.0417519	0.0409419
																																									339	0.520737	0.0421037	0.0410185
																																									340	0.522273	0.0434038	0.0411918
																																									341	0.52381	0.0435078	0.0413491
																																									342	0.525346	0.0437986	0.041362
																																									343	0.526882	0.044181	0.0413629
																																									344	0.528418	0.0444444	0.0415191
																																									345	0.529954	0.0452073	0.041537
																																									346	0.53149	0.0456706	0.0417379
																																									347	0.533026	0.0459259	0.0417963
																																									348	0.534562	0.0462808	0.0420059
																																									349	0.536098	0.0466045	0.0426886
																																									350	0.537634	0.0481717	0.0432546
																																									351	0.539171	0.0486064	0.043451
																																									352	0.540707	0.0488889	0.0436179
																																									353	0.542243	0.0491988	0.0436446
																																									354	0.543779	0.0494129	0.0438929
																																									355	0.545315	0.0494278	0.0440143
																																									356	0.546851	0.0499386	0.0443531
																																									357	0.548387	0.0499386	0.0446835
																																									358	0.549923	0.050982	0.0450419
																																									359	0.551459	0.050982	0.0451591
																																									360	0.552995	0.0510716	0.0452876
																																									361	0.554531	0.0510753	0.0453401
																																									362	0.556068	0.0518627	0.0454648
																																									363	0.557604	0.0519248	0.0454648
																																									364	0.55914	0.0519853	0.0455086
																																									365	0.560676	0.0519853	0.0461128
																																									366	0.562212	0.0529733	0.0461128
																																									367	0.563748	0.0530505	0.0462938
																																									368	0.565284	0.0530801	0.0465116
																																									369	0.56682	0.0537634	0.0465901
																																									370	0.568356	0.0537634	0.0467522
																																									371	0.569892	0.0540319	0.0473859
																																									372	0.571429	0.0542716	0.0475267
																																									373	0.572965	0.0543053	0.047629
																																									374	0.574501	0.0550089	0.048319
																																									375	0.576037	0.0556316	0.0499238
																																									376	0.577573	0.0556316	0.0513616
																																									377	0.579109	0.0557103	0.0514076
																																									378	0.580645	0.0558155	0.0514383
																																									379	0.582181	0.0559331	0.0516457
																																									380	0.583717	0.0560033	0.0517573
																																									381	0.585253	0.0564067	0.051855
																																									382	0.58679	0.057257	0.051855
																																									383	0.588326	0.057257	0.0520109
																																									384	0.589862	0.0575201	0.052217
																																									385	0.591398	0.0579498	0.0526316
																																									386	0.592934	0.0580698	0.0534028
																																									387	0.59447	0.0585468	0.054185
																																									388	0.596006	0.0590418	0.0544319
																																									389	0.597542	0.0591398	0.0544319
																																									390	0.599078	0.0592593	0.0548012
																																									391	0.600614	0.0597583	0.0554225
																																									392	0.602151	0.0600839	0.0566591
																																									393	0.603687	0.0601143	0.0571331
																																									394	0.605223	0.0602892	0.0571331
																																									395	0.606759	0.0603847	0.0575457
																																									396	0.608295	0.0605368	0.0575968
																																									397	0.609831	0.0608646	0.0582558
																																									398	0.611367	0.0608646	0.0587515
																																									399	0.612903	0.0610323	0.0596258
																																									400	0.614439	0.0612517	0.0605001
																																									401	0.615975	0.0618127	0.0605542
																																									402	0.617512	0.0623314	0.0609561
																																									403	0.619048	0.0625832	0.0610115
																																									404	0.620584	0.0628838	0.0612074
																																									405	0.62212	0.0631155	0.0612199
																																									406	0.623656	0.0633602	0.0620757
																																									407	0.625192	0.0635186	0.0622648
																																									408	0.626728	0.0637037	0.0622648
																																									409	0.628264	0.0637037	0.062417
																																									410	0.6298	0.0637742	0.0632374
																																									411	0.631336	0.0638298	0.0638353
																																									412	0.632873	0.0639021	0.064023
																																									413	0.634409	0.0639148	0.064336
																																									414	0.635945	0.0642652	0.0645025
																																									415	0.637481	0.0642652	0.0647997
																																									416	0.639017	0.0645161	0.0657458
																																									417	0.640553	0.0645161	0.0662933
																																									418	0.642089	0.0646056	0.0664279
																																									419	0.643625	0.0647515	0.0665518
																																									420	0.645161	0.0656049	0.0666105
																																									421	0.646697	0.066156	0.0671761
																																									422	0.648233	0.066156	0.0678168
																																									423	0.64977	0.0666667	0.0684427
																																									424	0.651306	0.0666667	0.068597
																																									425	0.652842	0.0666667	0.0687184
																																									426	0.654378	0.0670315	0.0689787
																																									427	0.655914	0.0673693	0.0690975
																																									428	0.65745	0.0679142	0.0697461
																																									429	0.658986	0.0687108	0.0718719
																																									430	0.660522	0.0689067	0.0719853
																																									431	0.662058	0.0690007	0.0722154
																																									432	0.663594	0.069241	0.0723772
																																									433	0.665131	0.0693114	0.0724926
																																									434	0.666667	0.0695273	0.0725176
																																									435	0.668203	0.0695939	0.0725176
																																									436	0.669739	0.0698232	0.0729404
																																									437	0.671275	0.0701242	0.0737424
																																									438	0.672811	0.0703343	0.0738611
																																									439	0.674347	0.0703451	0.0742388
																																									440	0.675883	0.0704052	0.0742388
																																									441	0.677419	0.0707002	0.0743912
																																									442	0.678955	0.0707002	0.0746178
																																									443	0.680492	0.070744	0.0746634
																																									444	0.682028	0.070949	0.0746794
																																									445	0.683564	0.0711405	0.0765401
																																									446	0.6851	0.0711504	0.0766006
																																									447	0.686636	0.0715914	0.0768371
																																									448	0.688172	0.0724519	0.0771114
																																									449	0.689708	0.07253	0.0778248
																																									450	0.691244	0.0725806	0.0781004
																																									451	0.69278	0.0730979	0.0782272
																																									452	0.694316	0.0735689	0.0783638
																																									453	0.695853	0.0743581	0.0790495
																																									454	0.697389	0.0749939	0.0791585
																																									455	0.698925	0.0752688	0.079258
																																									456	0.700461	0.0757988	0.0797342
																																									457	0.701997	0.0758988	0.0797789
																																									458	0.703533	0.0760334	0.0800604
																																									459	0.705069	0.0765658	0.080672
																																									460	0.706605	0.0768427	0.0808854
																																									461	0.708141	0.0774786	0.081196
																																									462	0.709677	0.0774786	0.0813757
																																									463	0.711214	0.0784314	0.0814765
																																									464	0.71275	0.0784314	0.0820073
																																									465	0.714286	0.0789405	0.0822819
																																									466	0.715822	0.0791978	0.0824191
																																									467	0.717358	0.0792063	0.0826018
																																									468	0.718894	0.0795625	0.0832313
																																									469	0.72043	0.0797685	0.0835233
																																									470	0.721966	0.0797685	0.0837863
																																									471	0.723502	0.0800129	0.0845022
																																									472	0.725038	0.0803276	0.0845407
																																									473	0.726575	0.0814815	0.0849799
																																									474	0.728111	0.0816261	0.085095
																																									475	0.729647	0.0818011	0.0858542
																																									476	0.731183	0.08181	0.086407
																																									477	0.732719	0.0818351	0.0867676
																																									478	0.734255	0.0829413	0.0867676
																																									479	0.735791	0.0832587	0.0869033
																																									480	0.737327	0.0836177	0.0870024
																																									481	0.738863	0.0838881	0.0870914
																																									482	0.740399	0.0838881	0.0887488
																																									483	0.741935	0.0842618	0.0892218
																																									484	0.743472	0.084271	0.0897521
																																									485	0.745008	0.0843778	0.0897976
																																									486	0.746544	0.0845658	0.0897976
																																									487	0.74808	0.0848067	0.0902256
																																									488	0.749616	0.0848826	0.0911736
																																									489	0.751152	0.0849349	0.0911736
																																									490	0.752688	0.0854941	0.0917407
																																									491	0.754224	0.0854969	0.0922975
																																									492	0.75576	0.085555	0.0927973
																																									493	0.757296	0.0859682	0.0932921
																																									494	0.758833	0.0860215	0.0932975
																																									495	0.760369	0.0860815	0.0932975
																																									496	0.761905	0.0865023	0.0935372
																																									497	0.763441	0.0871682	0.09375
																																									498	0.764977	0.0873786	0.0945866
																																									499	0.766513	0.0874099	0.0950507
																																									500	0.768049	0.0881687	0.0951662
																																									501	0.769585	0.0887097	0.0956555
																																									502	0.771121	0.0888889	0.0961214
																																									503	0.772657	0.0890399	0.0961457
																																									504	0.774194	0.0892144	0.0967833
																																									505	0.77573	0.0896031	0.0972316
																																									506	0.777266	0.0898313	0.0974919
																																									507	0.778802	0.0908001	0.097561
																																									508	0.780338	0.0908206	0.0982293
																																									509	0.781874	0.0922113	0.098357
																																									510	0.78341	0.0922985	0.0984481
																																									511	0.784946	0.0923377	0.0984481
																																									512	0.786482	0.0926184	0.0989376
																																									513	0.788018	0.0926184	0.0991807
																																									514	0.789555	0.0929182	0.0996951
																																									515	0.791091	0.0930476	0.0998014
																																									516	0.792627	0.0932011	0.0998127
																																									517	0.794163	0.0932091	0.100608
																																									518	0.795699	0.0933148	0.101034
																																									519	0.797235	0.0936608	0.101151
																																									520	0.798771	0.0940111	0.101591
																																									521	0.800307	0.0940463	0.101743
																																									522	0.801843	0.0942319	0.102023
																																									523	0.803379	0.0942904	0.102258
																																									524	0.804916	0.0944935	0.102258
																																									525	0.806452	0.0946673	0.102607
																																									526	0.807988	0.0948148	0.102815
																																									527	0.809524	0.0949055	0.103277
																																									528	0.81106	0.0951701	0.103319
																																									529	0.812596	0.0964684	0.103641
																																									530	0.814132	0.0978385	0.10423
																																									531	0.815668	0.0982296	0.105109
																																									532	0.817204	0.0982296	0.105263
																																									533	0.81874	0.0985165	0.105839
																																									534	0.820276	0.0989257	0.106503
																																									535	0.821813	0.0993426	0.10709
																																									536	0.823349	0.0993709	0.107165
																																									537	0.824885	0.100171	0.107711
																																									538	0.826421	0.100279	0.107841
																																									539	0.827957	0.100514	0.107841
																																									540	0.829493	0.10066	0.107971
																																									541	0.831029	0.101662	0.108147
																																									542	0.832565	0.101701	0.110736
																																									543	0.834101	0.101791	0.110877
																																									544	0.835637	0.102006	0.111111
																																									545	0.837174	0.102151	0.111208
																																									546	0.83871	0.102995	0.111383
																																									547	0.840246	0.103841	0.111627
																																									548	0.841782	0.104457	0.112016
																																									549	0.843318	0.105064	0.11226
																																									550	0.844854	0.105583	0.113432
																																									551	0.84639	0.106225	0.114278
																																									552	0.847926	0.106634	0.114705
																																									553	0.849462	0.107245	0.114999
																																									554	0.850998	0.107282	0.115093
																																									555	0.852535	0.107437	0.115093
																																									556	0.854071	0.108148	0.116086
																																									557	0.855607	0.108733	0.11624
																																									558	0.857143	0.109452	0.116363
																																									559	0.858679	0.110163	0.116856
																																									560	0.860215	0.110821	0.116997
																																									561	0.861751	0.111692	0.117569
																																									562	0.863287	0.111936	0.118528
																																									563	0.864823	0.112049	0.118747
																																									564	0.866359	0.114206	0.119156
																																									565	0.867896	0.114405	0.119662
																																									566	0.869432	0.114593	0.119869
																																									567	0.870968	0.116587	0.120272
																																									568	0.872504	0.116799	0.120424
																																									569	0.87404	0.117191	0.121175
																																									570	0.875576	0.11795	0.12122
																																									571	0.877112	0.121516	0.122178
																																									572	0.878648	0.122503	0.123051
																																									573	0.880184	0.128291	0.123293
																																									574	0.88172	0.128332	0.124007
																																									575	0.883257	0.128745	0.125362
																																									576	0.884793	0.130996	0.127546
																																									577	0.886329	0.131368	0.128137
																																									578	0.887865	0.131379	0.13186
																																									579	0.889401	0.131805	0.132138
																																									580	0.890937	0.13247	0.132486
																																									581	0.892473	0.132601	0.134477
																																									582	0.894009	0.133617	0.135596
																																									583	0.895545	0.134054	0.136411
																																									584	0.897081	0.135419	0.13646
																																									585	0.898618	0.135565	0.137245
																																									586	0.900154	0.135604	0.139203
																																									587	0.90169	0.136982	0.139262
																																									588	0.903226	0.137097	0.140765
																																									589	0.904762	0.137656	0.140951
																																									590	0.906298	0.13766	0.142781
																																									591	0.907834	0.137778	0.142837
																																									592	0.90937	0.138482	0.143149
																																									593	0.910906	0.139518	0.143723
																																									594	0.912442	0.1397	0.144767
																																									595	0.913978	0.139972	0.145152
																																									596	0.915515	0.140501	0.14525
																																									597	0.917051	0.142271	0.148738
																																									598	0.918587	0.142798	0.148747
																																									599	0.920123	0.144484	0.14937
																																									600	0.921659	0.14567	0.151101
																																									601	0.923195	0.146132	0.151316
																																									602	0.924731	0.146239	0.154636
																																									603	0.926267	0.146931	0.158214
																																									604	0.927803	0.147105	0.158699
																																									605	0.929339	0.149095	0.159359
																																									606	0.930876	0.149236	0.159767
																																									607	0.932412	0.150771	0.163919
																																									608	0.933948	0.150883	0.16569
																																									609	0.935484	0.151391	0.165776
																																									610	0.93702	0.151769	0.16832
																																									611	0.938556	0.151877	0.168659
																																									612	0.940092	0.151913	0.169313
																																									613	0.941628	0.1539	0.169363
																																									614	0.943164	0.156384	0.171924
																																									615	0.9447	0.156433	0.172007
																																									616	0.946237	0.156638	0.174115
																																									617	0.947773	0.157543	0.178331
																																									618	0.949309	0.159075	0.179491
																																									619	0.950845	0.16129	0.180469
																																									620	0.952381	0.167337	0.184023
																																									621	0.953917	0.173737	0.193086
																																									622	0.955453	0.174507	0.199184
																																									623	0.956989	0.174731	0.200291
																																									624	0.958525	0.175457	0.202683
																																									625	0.960061	0.178277	0.210681
																																									626	0.961598	0.181697	0.214997
																																									627	0.963134	0.183661	0.216064
																																									628	0.96467	0.185406	0.218381
																																									629	0.966206	0.186252	0.223059
																																									630	0.967742	0.186272	0.2251
																																									631	0.969278	0.18663	0.226262
																																									632	0.970814	0.192939	0.226405
																																									633	0.97235	0.194349	0.229389
																																									634	0.973886	0.194746	0.231814
																																									635	0.975422	0.197298	0.2417
																																									636	0.976959	0.19927	0.243114
																																									637	0.978495	0.206989	0.243494
																																									638	0.980031	0.207204	0.24502
																																									639	0.981567	0.209879	0.246363
																																									640	0.983103	0.211662	0.25166
																																									641	0.984639	0.214976	0.252286
																																									642	0.986175	0.216035	0.26162
																																									643	0.987711	0.217799	0.263337
																																									644	0.989247	0.223809	0.299058
																																									645	0.990783	0.244624	0.314741
																																									646	0.99232	0.25	0.337981
																																									647	0.993856	0.252735	0.340641
																																									648	0.995392	0.25535	0.397742
																																									649	0.996928	0.260498	0.4258
																																									650	0.998464	0.271085	0.434263
																																									651	1	0.310608	0.686587

## Sheet: B3
B3
			There are four tables in this spreadsheet. The three stacked below examine (1) statistics of precision, (2) assessment and error, and (3) preparation of data for examination of error for low reflectance data. The last table (scroll to the right) ranks the % error.																																						Values from the error tables that are ranked and displayed
																																									n=651
		Table 1 Reflectance Values, Average, Stdev and CoV% by percentile (rows)
			SZA	23.22	26.41	24.48	22.54	27.86	23	27.37	24.11	22.01	22.6	23.4	27.44	26.48	22.59	25.75	21.84	24.18	26.9	21.78	23.64	23.33	21.94	26.17	28.03	25.31	24.23	25.39	22.27	21.76	22.09	23.94								%	Ranked % Error
			Atm-I	890	891	892	893	898	903	904	908	912	916	932	934	937	942	944	945	950	951	954	957	959	962	973	974	982	994	995	996	1009	1018	1062							Step	Cum. Step	CMAC	LaSRC
			SENSOR	L8	L8	L8	L8	L8	L8	L8	L8	L8	L9	L9	L9	L9	L8	L8	L9	L9	L8	L8	L8	L8	L8	L8	L8	L8	L8	L9	L8	L8	L8	L8							1	0.0015361	-0.189962	-0.209045
			TOA	07-09-22	08-02-19	07-19-20	07-01-19	08-10-22	07-06-21	08-07-21	07-17-19	06-23-22	07-01-22	07-10-22	08-11-22	08-02-22	07-02-22	07-28-20	06-15-22	07-17-22	08-04-20	06-13-21	07-12-20	07-10-19	06-20-21	07-31-21	08-11-19	07-26-19	07-18-22	07-26-22	06-26-20	06-16-22	06-24-19	07-15-21	Avg	StDev	CV%				2	0.0030722	-0.178637	-0.202262
			1	959	949	960	999	946	993	961	1001	989	1023	1032	988	1032	1042	1046	1099	1031	1056	1063	1066	1073	1044	1069	1039	1078	1108	1124	1153	1178	1184	1193	1047.68	68.7306	0.0656028				3	0.00460829	-0.166169	-0.189102
			3	1037	1011	1021	1061	1029	1067	1026	1076	1068	1089	1099	1057	1101	1118	1118	1161	1097	1135	1127	1141	1133	1116	1122	1102	1132	1184	1188	1196	1243	1238	1251	1114.32	64.7175	0.0580779				4	0.00614439	-0.161287	-0.171846
			5	1087	1060	1073	1107	1070	1110	1070	1121	1112	1134	1156	1103	1136	1168	1152	1200	1143	1164	1179	1186	1176	1153	1179	1147	1177	1214	1228	1232	1284	1280	1287	1157.68	62.0228	0.0535752				5	0.00768049	-0.158697	-0.165631
			10	1178	1146	1179	1200	1148	1191	1179	1204	1211	1236	1252	1201	1221	1261	1247	1288	1239	1232	1269	1278	1258	1227	1270	1244	1258	1295	1305	1335	1367	1367	1346	1246.19	58.3732	0.0468412				6	0.00921659	-0.143683	-0.163738
			15	1263	1227	1248	1281	1230	1275	1252	1274	1304	1317	1337	1276	1295	1356	1329	1366	1316	1303	1364	1364	1348	1310	1349	1314	1330	1371	1386	1404	1445	1443	1400	1325.06	57.2963	0.0432404				7	0.0107527	-0.141086	-0.145672
			20	1352	1286	1327	1346	1314	1341	1314	1342	1376	1392	1422	1365	1368	1436	1399	1440	1385	1357	1439	1433	1423	1375	1421	1383	1396	1450	1451	1468	1505	1509	1444	1395.45	55.366	0.039676				8	0.0122888	-0.134529	-0.143058
			25	1426	1353	1381	1411	1397	1414	1382	1403	1455	1470	1498	1440	1442	1510	1458	1511	1449	1411	1504	1493	1499	1427	1494	1438	1462	1517	1519	1534	1591	1572	1496	1463.13	56.7942	0.038817				9	0.0138249	-0.130246	-0.13602
			30	1499	1409	1441	1484	1457	1477	1466	1469	1524	1550	1578	1516	1513	1597	1517	1591	1516	1464	1572	1557	1566	1485	1558	1493	1514	1588	1581	1598	1662	1634	1545	1529.71	59.1677	0.038679				10	0.015361	-0.129184	-0.132428
			35	1567	1477	1509	1547	1521	1542	1541	1531	1613	1624	1659	1589	1579	1685	1593	1659	1598	1513	1652	1630	1622	1555	1628	1556	1578	1674	1661	1659	1729	1699	1588	1599.29	62.4063	0.0390212				11	0.0168971	-0.125467	-0.122121
			40	1674	1546	1588	1629	1616	1623	1607	1602	1698	1716	1742	1679	1672	1771	1670	1737	1680	1575	1739	1711	1697	1634	1716	1635	1673	1742	1738	1729	1794	1779	1641	1679.13	63.277	0.0376844				12	0.0184332	-0.124328	-0.120293
			45	1776	1617	1670	1725	1706	1698	1690	1668	1792	1805	1830	1784	1757	1866	1742	1825	1751	1645	1830	1778	1781	1713	1801	1705	1743	1820	1808	1802	1889	1849	1704	1760.32	67.3327	0.0382502				13	0.0199693	-0.115839	-0.117997
			50	1873	1688	1752	1811	1798	1782	1777	1738	1879	1901	1926	1864	1840	1960	1829	1907	1835	1707	1919	1859	1869	1802	1887	1765	1803	1909	1883	1871	1966	1926	1763	1841.58	72.3421	0.0392826				14	0.0215054	-0.113494	-0.11743
			55	1971	1775	1827	1893	1900	1865	1868	1827	1986	1998	2050	1969	1930	2061	1916	2002	1920	1768	2019	1951	1955	1889	1984	1843	1889	2014	1971	1964	2057	2009	1827	1932.19	80.7021	0.0417671				15	0.0230415	-0.109793	-0.116077
			60	2064	1859	1930	1995	1987	1949	1985	1905	2089	2108	2157	2082	2034	2197	2012	2105	2019	1842	2121	2054	2040	1961	2094	1926	1978	2103	2067	2049	2169	2087	1893	2027.77	90.3654	0.0445639				16	0.0245776	-0.106769	-0.114442
			65	2163	1948	2002	2085	2096	2033	2083	1990	2185	2186	2263	2196	2123	2302	2087	2183	2113	1911	2227	2154	2140	2037	2203	2016	2067	2202	2158	2137	2264	2190	1960	2119.48	98.288	0.0463735				17	0.0261137	-0.106171	-0.114077
			70	2267	2026	2085	2161	2193	2124	2176	2078	2285	2298	2369	2295	2222	2420	2158	2290	2206	1977	2297	2233	2213	2123	2285	2094	2135	2287	2262	2211	2366	2268	2025	2207.39	107.34	0.0486274				18	0.0276498	-0.103535	-0.111092
			75	2406	2106	2195	2287	2295	2214	2283	2167	2427	2426	2474	2385	2328	2519	2250	2406	2323	2054	2384	2311	2305	2213	2390	2162	2211	2377	2340	2298	2458	2340	2096	2304.19	115.974	0.0503318				19	0.0291859	-0.102939	-0.108159
			80	2667	2226	2310	2409	2464	2377	2402	2290	2692	2678	2629	2530	2492	2688	2341	2626	2486	2159	2499	2419	2406	2359	2479	2283	2310	2529	2486	2387	2612	2435	2169	2446.42	149.07	0.0609338				20	0.030722	-0.10049	-0.107038
			85	3168	2442	2517	2642	2895	2688	2679	2469	3126	3118	3088	2918	2855	3127	2528	3044	2889	2341	2703	2586	2566	2620	2700	2425	2461	2894	2808	2564	2988	2591	2339	2734.81	252.524	0.092337				21	0.0322581	-0.0976627	-0.0987203
			90	3902	2910	3041	3117	3575	3178	3247	2983	3970	3847	3908	3666	3542	3957	2972	3787	3567	2760	3194	3020	3074	3083	3248	2861	2935	3622	3497	2993	3762	3002	2673	3319.13	395.63	0.119197				22	0.0337942	-0.0969267	-0.0946844
			95	4738	4056	4031	3858	4375	4114	4345	4124	4909	4847	4748	4444	4370	4851	3979	4598	4362	3588	4125	4068	4049	4008	4184	3972	3967	4363	4200	4108	4529	3853	3379	4230.39	363.352	0.0858909				23	0.0353303	-0.0959354	-0.094375
			CMAC	07-09-22	08-02-19	07-19-20	07-01-19	08-10-22	07-06-21	08-07-21	07-17-19	06-23-22	07-01-22	07-10-22	08-11-22	08-02-22	07-02-22	07-28-20	06-15-22	07-17-22	08-04-20	06-13-21	07-12-20	07-10-19	06-20-21	07-31-21	08-11-19	07-26-19	07-18-22	07-26-22	06-26-20	06-16-22	06-24-19	07-15-21	Avg	StDev	CV%				24	0.0368664	-0.0955285	-0.091149
			1	588	572	589	629	559	600	569	613	582	627	627	554	615	619	622	688	591	616	622	620	635	583	605	576	601	624	650	681	704	692	648	616.161	38.2423	0.0620654				25	0.0384025	-0.0951564	-0.0905625
			3	668	640	657	704	653	694	648	701	684	707	692	650	695	711	705	757	673	716	703	719	705	672	679	654	674	727	731	741	786	761	726	697.839	35.6577	0.0510974				26	0.0399386	-0.0945938	-0.0891341
			5	733	701	720	756	707	747	697	756	736	761	772	704	736	769	752	805	735	749	768	773	755	720	745	709	730	767	775	786	837	817	769	751.194	33.4299	0.0445024				27	0.0414747	-0.0899783	-0.0885096
			10	839	806	839	865	798	842	830	853	859	890	885	823	839	885	864	914	850	833	881	891	866	819	855	830	839	874	887	917	950	940	857	861.935	36.384	0.042212				28	0.0430108	-0.0880218	-0.088117
			15	942	899	926	962	899	938	916	939	968	982	992	916	934	1005	971	1011	944	923	1001	1000	976	925	962	919	928	971	984	1011	1052	1042	933	960.355	40.4249	0.0420937				29	0.0445469	-0.0851064	-0.0870126
			20	1041	971	1017	1035	990	1020	987	1022	1055	1074	1099	1026	1024	1104	1058	1103	1036	991	1096	1085	1075	1004	1057	1006	1018	1074	1073	1095	1136	1127	994	1048.16	44.417	0.0423761				30	0.0460829	-0.0850543	-0.0857268
			25	1132	1051	1082	1115	1090	1106	1070	1095	1153	1168	1186	1115	1113	1195	1130	1193	1112	1058	1179	1159	1167	1074	1148	1081	1098	1160	1161	1181	1246	1217	1066	1132.29	50.3377	0.0444565				31	0.047619	-0.0817394	-0.0846625
			30	1220	1115	1154	1201	1165	1184	1168	1172	1230	1266	1288	1208	1203	1302	1205	1296	1197	1131	1264	1243	1252	1146	1231	1145	1168	1256	1244	1260	1341	1295	1135	1215.65	58.1117	0.0478032				32	0.0491551	-0.0814137	-0.0817757
			35	1301	1195	1232	1279	1240	1261	1260	1249	1338	1353	1385	1299	1287	1414	1297	1378	1303	1188	1363	1335	1324	1236	1319	1228	1252	1366	1349	1345	1432	1385	1198	1302.94	65.8245	0.0505201				33	0.0506912	-0.0785353	-0.0788316
			40	1425	1277	1325	1373	1350	1359	1339	1332	1447	1466	1492	1407	1400	1521	1392	1475	1404	1266	1473	1438	1419	1335	1435	1331	1372	1455	1449	1439	1518	1488	1271	1402.35	70.9993	0.0506286				34	0.0522273	-0.0784062	-0.0787169
			45	1547	1360	1422	1484	1460	1450	1437	1412	1557	1572	1597	1538	1508	1635	1485	1585	1494	1353	1586	1523	1525	1435	1542	1419	1463	1557	1541	1534	1644	1588	1365	1503.81	78.6221	0.052282				35	0.0537634	-0.0782023	-0.0713824
			50	1661	1444	1518	1588	1569	1547	1542	1496	1661	1689	1716	1637	1606	1752	1592	1688	1596	1434	1699	1623	1635	1550	1650	1498	1542	1674	1641	1627	1746	1687	1440	1604.77	87.5308	0.054544				36	0.0552995	-0.0758181	-0.0711618
			55	1775	1546	1606	1684	1691	1647	1653	1603	1791	1806	1867	1766	1719	1879	1699	1805	1702	1511	1826	1739	1745	1660	1779	1596	1653	1814	1757	1747	1866	1800	1530	1718.13	99.8107	0.0580927				37	0.0568356	-0.0745501	-0.0680073
			60	1886	1644	1728	1804	1794	1748	1791	1695	1915	1938	1997	1906	1847	2049	1819	1934	1826	1602	1954	1869	1851	1750	1918	1703	1768	1929	1881	1859	2015	1905	1627	1837.16	113.209	0.0616215				38	0.0583717	-0.0719794	-0.0669104
			65	2001	1748	1812	1910	1923	1848	1908	1796	2030	2033	2127	2045	1956	2178	1912	2032	1944	1690	2086	1995	1978	1846	2058	1817	1882	2058	2001	1973	2142	2043	1719	1951.32	124.075	0.0635853				39	0.0599078	-0.0718895	-0.0661116
			70	2129	1841	1910	2000	2038	1957	2018	1902	2152	2167	2258	2169	2079	2325	2000	2162	2060	1773	2176	2095	2069	1956	2164	1919	1971	2166	2136	2070	2279	2148	1809	2061.23	135.962	0.0659616				40	0.0614439	-0.0718157	-0.0657895
			75	2290	1935	2039	2150	2161	2066	2148	2009	2326	2324	2388	2280	2209	2448	2116	2312	2208	1870	2284	2194	2188	2071	2298	2006	2069	2288	2240	2186	2399	2246	1910	2182.52	146.368	0.0670641				41	0.06298	-0.0698474	-0.0657558
			80	2604	2077	2176	2292	2360	2260	2291	2156	2648	2624	2581	2458	2414	2661	2227	2587	2413	2002	2429	2330	2316	2257	2415	2162	2198	2487	2432	2302	2602	2372	2013	2359.55	185.269	0.078519				42	0.0645161	-0.0696189	-0.0647545
			85	3190	2331	2420	2568	2875	2633	2620	2373	3164	3161	3139	2938	2866	3212	2458	3114	2918	2232	2686	2541	2514	2591	2697	2344	2391	2967	2856	2538	3112	2584	2252	2718.87	309.453	0.113817				43	0.0660522	-0.0688991	-0.0645764
			90	4046	2882	3038	3132	3679	3219	3305	2987	4181	4041	4147	3858	3712	4236	3010	4020	3766	2756	3307	3093	3163	3177	3406	2904	3008	3912	3758	3101	4138	3137	2718	3446.35	481.293	0.139653				44	0.0675883	-0.0665792	-0.0639854
			95	5043	4242	4200	4009	4659	4346	4621	4343	5280	5223	5177	4817	4727	5336	4273	5010	4746	3794	4476	4422	4393	4361	4602	4332	4350	4894	4678	4562	5153	4271	3716	4582.45	418.88	0.0914096				45	0.0691244	-0.0650891	-0.0637109
			LaSRC_Surface	07-09-22	08-02-19	07-19-20	07-01-19	08-10-22	07-06-21	08-07-21	07-17-19	06-23-22	07-01-22	07-10-22	08-11-22	08-02-22	07-02-22	07-28-20	06-15-22	07-17-22	08-04-20	06-13-21	07-12-20	07-10-19	06-20-21	07-31-21	08-11-19	07-26-19	07-18-22	07-26-22	06-26-20	06-16-22	06-24-19	07-15-21	Avg	StDev	CV%				46	0.0706605	-0.0650351	-0.0635814
			1	575	622	625	658	616	641	529	671	580	681	646	631	683	617	663	746	667	707	680	694	668	669	658	652	684	712	724	773	754	763	841	671.935	63.0079	0.0937708				47	0.0721966	-0.0633417	-0.0633075
			3	687	689	705	732	702	730	659	755	718	776	756	737	779	746	768	842	762	812	786	779	750	754	742	749	766	813	838	840	855	862	909	767.677	57.1655	0.0744655				48	0.0737327	-0.0622222	-0.0632537
			5	757	757	759	798	757	786	732	816	782	826	821	794	825	827	820	894	823	850	844	840	818	804	813	812	829	873	894	902	921	914	955	827.194	53.4605	0.0646288				49	0.0752688	-0.0615977	-0.0625889
			10	862	874	883	919	853	891	854	923	921	954	944	906	920	952	934	1002	930	933	968	961	931	901	918	930	932	971	999	1018	1041	1037	1045	938.935	52.5001	0.0559145				50	0.0768049	-0.0608189	-0.0592767
			15	976	967	962	1012	954	987	957	999	1025	1053	1050	1001	1017	1061	1039	1093	1016	1012	1074	1063	1042	1009	1024	1014	1024	1059	1100	1124	1137	1132	1112	1035.32	51.4642	0.0497083				51	0.078341	-0.0607351	-0.0589953
			20	1090	1037	1045	1093	1055	1076	1029	1077	1119	1138	1141	1104	1096	1153	1116	1182	1112	1083	1166	1158	1142	1081	1128	1097	1104	1159	1186	1203	1223	1210	1170	1121.71	51.2225	0.0456647				52	0.0798771	-0.0585185	-0.0588665
			25	1175	1105	1119	1164	1131	1153	1103	1156	1208	1234	1236	1195	1186	1249	1194	1260	1183	1149	1244	1241	1229	1152	1210	1166	1194	1249	1266	1280	1306	1307	1230	1202.39	55.4092	0.0460827				53	0.0814132	-0.0573404	-0.0578281
			30	1255	1178	1195	1249	1211	1235	1203	1228	1294	1323	1347	1278	1267	1353	1276	1357	1266	1210	1322	1307	1313	1223	1296	1236	1264	1338	1347	1358	1410	1375	1297	1284.23	59.6063	0.0464142				54	0.0829493	-0.0568607	-0.0573005
			35	1339	1263	1284	1335	1297	1316	1293	1302	1392	1416	1440	1377	1362	1467	1370	1439	1363	1274	1430	1399	1394	1304	1381	1314	1349	1445	1437	1437	1502	1454	1350	1371.77	64.118	0.0467409				55	0.0844854	-0.0546529	-0.0564516
			40	1462	1341	1367	1432	1400	1419	1389	1390	1492	1523	1551	1478	1463	1571	1468	1530	1468	1349	1535	1489	1489	1403	1494	1414	1460	1532	1529	1536	1585	1555	1425	1469	67.0845	0.0456668				56	0.0860215	-0.0540741	-0.0534788
			45	1590	1423	1459	1531	1514	1508	1480	1471	1610	1629	1656	1606	1567	1690	1547	1637	1554	1428	1642	1585	1593	1502	1603	1504	1536	1633	1618	1621	1681	1647	1504	1566.74	73.6356	0.0469992				57	0.0875576	-0.053168	-0.0528972
			50	1708	1514	1558	1641	1626	1592	1587	1548	1723	1736	1779	1705	1669	1797	1636	1736	1657	1503	1756	1680	1686	1602	1707	1578	1618	1739	1724	1705	1798	1744	1578	1665.48	82.1453	0.0493222				58	0.0890937	-0.0520471	-0.0526719
			55	1825	1611	1647	1737	1740	1695	1692	1650	1851	1855	1915	1834	1764	1925	1749	1848	1758	1572	1876	1803	1796	1710	1834	1671	1720	1876	1833	1814	1908	1851	1653	1774.61	94.7184	0.0533741				59	0.0906298	-0.051853	-0.050457
			60	1935	1709	1764	1858	1856	1791	1833	1758	1964	1984	2048	1971	1896	2071	1864	1971	1880	1668	2000	1910	1907	1794	1963	1771	1829	1981	1947	1921	2042	1955	1735	1889.55	104.503	0.0553058				60	0.0921659	-0.0515366	-0.050153
			65	2046	1802	1848	1959	1977	1890	1949	1846	2086	2080	2182	2119	2017	2208	1959	2062	1982	1744	2127	2035	2026	1889	2099	1880	1936	2101	2053	2031	2165	2074	1815	1999.58	118.407	0.0592161				61	0.093702	-0.0507322	-0.0492211
			70	2178	1890	1953	2051	2102	1993	2053	1953	2207	2213	2308	2234	2125	2353	2048	2192	2098	1817	2216	2128	2118	1987	2187	1967	2027	2197	2176	2129	2294	2173	1901	2105.42	129.923	0.0617088				62	0.0952381	-0.0501182	-0.0490024
			75	2343	1999	2086	2201	2220	2111	2186	2063	2372	2369	2445	2348	2267	2484	2163	2335	2248	1915	2324	2219	2228	2098	2310	2064	2122	2318	2289	2227	2408	2262	1981	2225.97	140.216	0.0629912				63	0.0967742	-0.0491436	-0.0487603
			80	2645	2146	2223	2348	2418	2308	2321	2201	2696	2665	2640	2530	2457	2698	2277	2608	2445	2044	2456	2350	2358	2290	2424	2221	2244	2509	2458	2347	2576	2372	2078	2398.48	178.385	0.0743739				64	0.0983103	-0.0483487	-0.0475382
			85	3246	2406	2465	2622	2936	2677	2659	2423	3201	3179	3200	2995	2888	3247	2494	3094	2929	2265	2716	2560	2549	2597	2729	2401	2422	2971	2866	2574	3035	2552	2282	2747.74	302.639	0.110141				65	0.0998464	-0.0478224	-0.0471582
			90	4086	2946	3088	3193	3736	3249	3343	3031	4193	4019	4137	3882	3674	4202	3041	3948	3692	2765	3304	3101	3189	3141	3390	2922	3014	3834	3694	3108	4004	3099	2697	3442.65	460.311	0.133708				66	0.101382	-0.0450951	-0.0459133
			95	5006	4268	4235	4063	4622	4315	4612	4370	5188	5107	5110	4787	4619	5209	4204	4872	4616	3712	4409	4348	4367	4205	4492	4252	4244	4716	4517	4426	4865	4156	3541	4498.48	400.413	0.0890106				67	0.102919	-0.0440707	-0.0438871
																																									68	0.104455	-0.0435409	-0.0438857
																																									69	0.105991	-0.0430217	-0.0424165
	Table 2 Estimated correction error treating the percentile averages of the five lowest Atm-I images as the estimate closest to surface reflectance (standard)																								% error = (value-standard)/standard/standard								These data feed to Table 4, this spreadsheet								70	0.107527	-0.0425676	-0.0420834
			SZA	24.48	23.22	22.54	26.41	24.11	23	27.37	27.86	22.6	22.01	27.44	24.18	21.84	26.48	23.4	23.64	25.75	28.03	22.59	26.9	21.94	21.78	23.33	26.17	25.39	24.23	25.31	22.27	21.76	22.09	23.94							71	0.109063	-0.0411397	-0.0417359
			Atm-I	890	891	892	893	898	903	904	908	912	916	932	934	937	942	944	945	950	951	954	957	959	962	973	974	982	994	995	996	1009	1018	1062							72	0.110599	-0.0411373	-0.0413163
			SENSOR	L8	L8	L8	L8	L8	L8	L8	L8	L9	L8	L9	L9	L9	L9	L9	L8	L8	L8	L8	L8	L8	L8	L8	L8	L9	L8	L8	L8	L8	L8	L8							73	0.112135	-0.0406509	-0.0406977
	CMAC	Percentile	Standard	07-19-20	07-09-22	07-01-19	08-02-19	07-17-19	07-06-21	08-07-21	08-10-22	07-01-22	06-23-22	08-11-22	07-17-22	06-15-22	08-02-22	07-10-22	07-12-20	07-28-20	08-11-19	07-02-22	08-04-20	06-20-21	06-13-21	07-10-19	07-31-21	07-26-22	07-18-22	07-26-19	06-26-20	06-16-22	06-24-19	07-15-21							74	0.113671	-0.0406455	-0.0402005
		1	587.4	0.00102145	-0.0262172	0.00272387	0.0708206	-0.0483487	0.0214505	-0.0313245	0.0435819	-0.00919305	0.0674157	0.0674157	-0.0568607	0.0469867	0.0537964	0.0589036	0.171263	0.0061287	0.0486891	0.0589036	0.0554988	0.0810351	-0.00749064	0.0299625	-0.0194076	0.0231529	0.0623085	0.106571	0.159346	0.198502	0.178073	0.103166							75	0.115207	-0.0393748	-0.0402005
		3	664.4	0.00541842	-0.0367249	-0.0111379	0.0596026	-0.0171583	0.0445515	-0.0246839	0.0550873	0.0295003	0.064118	0.0415412	-0.0216737	0.0460566	0.0701385	0.0611078	0.139374	0.012944	0.0776641	0.0580975	0.0821794	0.0611078	0.0114389	0.0219747	-0.0156532	0.0144491	0.0942203	0.100241	0.115292	0.183022	0.145394	0.0927152							76	0.116743	-0.0393053	-0.0386211
		5	723.4	0.0132707	-0.0309649	-0.00470003	0.045065	-0.0226707	0.0326237	-0.0364943	0.045065	0.0174177	0.0519768	0.0671827	-0.0268178	0.0174177	0.0630357	0.0395355	0.112801	0.0160354	0.0353884	0.0616533	0.0685651	0.0436826	-0.00470003	0.029859	-0.019906	0.00912358	0.0602709	0.0713298	0.0865358	0.157036	0.129389	0.0630357							77	0.11828	-0.0387858	-0.0384789
		10	829.4	0.0115746	-0.0282132	0.0115746	0.0429226	-0.0378587	0.0151917	0.000723415	0.0284543	0.0356884	0.0730649	0.0670364	-0.00771642	0.0115746	0.0670364	0.0417169	0.102001	0.0248372	0.00434049	0.0622136	0.0742706	0.0441283	-0.0125392	0.0308657	0.000723415	0.0115746	0.0537738	0.0694478	0.105619	0.145406	0.133349	0.0332771							78	0.119816	-0.0385604	-0.0381509
		15	925.6	0.0177182	-0.0287381	0.000432152	0.0393258	-0.0287381	0.0133967	-0.0103717	0.0144771	0.0458081	0.0609334	0.0717373	-0.0103717	0.00907519	0.0857822	0.0490493	0.0922645	0.019879	-0.00280899	0.0814607	0.0803803	0.0544512	-0.000648228	0.0393258	-0.00713051	0.00259291	0.0490493	0.0630942	0.0922645	0.13656	0.125756	0.00799481							79	0.121352	-0.038505	-0.0379673
		20	1010.8	0.0298773	-0.0393748	0.00613376	0.0239414	-0.0205778	0.0091017	-0.0235457	0.0110803	0.0437277	0.0625247	0.0872576	0.0150376	0.013059	0.0922042	0.0466957	0.0912149	0.0249307	-0.0195884	0.0842897	0.0734072	0.063514	-0.00672734	0.0457064	-0.00474871	0.00712307	0.0625247	0.0615354	0.0833004	0.123862	0.114958	-0.0166205							80	0.122888	-0.0378587	-0.0367038
		25	1094	0.0347349	-0.0393053	-0.0109689	0.0191956	-0.00365631	0.0109689	-0.0219378	0.000914077	0.0539305	0.0676417	0.0840951	0.0191956	0.0173675	0.0923218	0.0329068	0.0904936	0.0164534	-0.0329068	0.0776965	0.059415	0.0667276	-0.0182815	0.0493601	-0.011883	0.00365631	0.0603291	0.0612431	0.0795247	0.13894	0.112431	-0.0255941							81	0.124424	-0.0372751	-0.0363955
		30	1171	0.0418446	-0.0478224	-0.0145175	0.0256191	-0.00512383	0.0111016	-0.00256191	0.000853971	0.0503843	0.0811272	0.0999146	0.0315969	0.0273271	0.11187	0.029035	0.106746	0.0222032	-0.0341588	0.0794193	0.0614859	0.0691716	-0.0213493	0.0512383	-0.0222032	-0.00256191	0.0725875	0.0623399	0.0760034	0.145175	0.105892	-0.030743							82	0.12596	-0.0371043	-0.036215
		35	1249.4	0.0412998	-0.0435409	-0.0139267	0.0236914	-0.00752361	0.00928446	0.00848407	-0.000320154	0.070914	0.0829198	0.108532	0.0396991	0.0300944	0.131743	0.0380983	0.102929	0.0429006	-0.0491436	0.0909236	0.0685129	0.0597087	-0.0107251	0.0557067	-0.0171282	0.002081	0.0933248	0.0797183	0.0765167	0.14615	0.108532	-0.0411397							83	0.127496	-0.0367249	-0.0344626
		40	1350	0.0555556	-0.0540741	-0.0185185	0.017037	0	0.00666667	-0.00814815	-0.0133333	0.0718519	0.0859259	0.105185	0.0422222	0.037037	0.126667	0.0311111	0.0925926	0.04	-0.0622222	0.0911111	0.0651852	0.0511111	-0.0111111	0.062963	-0.0140741	0.0162963	0.0777778	0.0733333	0.0659259	0.124444	0.102222	-0.0585185							84	0.129032	-0.0364943	-0.0335314
		45	1454.6	0.0635226	-0.0650351	-0.0224117	0.0202117	0.00371236	-0.00316238	-0.0120995	-0.0292864	0.0703974	0.0807095	0.0978963	0.0573353	0.0367111	0.12402	0.0208992	0.0896466	0.0270865	-0.0698474	0.0903341	0.0470232	0.0483982	-0.0134745	0.0600852	-0.0244741	0.00577478	0.0703974	0.0593978	0.0545855	0.130208	0.0917091	-0.0615977							85	0.130568	-0.0360222	-0.0333202
		50	1556	0.0674807	-0.0719794	-0.0244216	0.0205656	0.00835476	-0.00578406	-0.00899743	-0.0385604	0.0674807	0.0854756	0.102828	0.0520566	0.0321337	0.125964	0.0231362	0.0848329	0.0257069	-0.0784062	0.0919023	0.0430591	0.0507712	-0.00385604	0.0604113	-0.0372751	-0.00899743	0.0758355	0.0546272	0.0456298	0.122108	0.0841902	-0.0745501							86	0.132104	-0.0359338	-0.0331068
		55	1660.4	0.0690195	-0.0688991	-0.0327632	0.0142134	0.0184293	-0.00807034	-0.00445676	-0.03457	0.0786557	0.0876897	0.124428	0.0635991	0.0352927	0.131655	0.0232474	0.0870874	0.0250542	-0.0899783	0.099735	0.047338	0.0509516	-0.000240906	0.0714286	-0.0387858	-0.00445676	0.0925078	0.0581788	0.0521561	0.123826	0.0840761	-0.0785353							87	0.133641	-0.0355708	-0.0330906
		60	1771.2	0.0648148	-0.0718157	-0.0243902	0.0185185	0.0128726	-0.0130985	0.0111789	-0.0430217	0.0811879	0.0941734	0.127484	0.0761066	0.0427958	0.156843	0.0269874	0.0919151	0.0309395	-0.0955285	0.103207	0.0552168	0.0450542	-0.0119693	0.0828817	-0.038505	-0.00180668	0.0890921	0.0619919	0.0495709	0.137647	0.075542	-0.0814137							88	0.135177	-0.0355546	-0.0328947
		65	1878.8	0.0650415	-0.0696189	-0.0355546	0.0166063	0.0235257	-0.0163934	0.0155418	-0.0440707	0.0804769	0.0820737	0.132106	0.0884607	0.0410901	0.159251	0.0176709	0.0815414	0.034703	-0.10049	0.110283	0.061848	0.0527997	-0.017458	0.09538	-0.0328933	0.00170321	0.09538	0.0650415	0.0501384	0.140089	0.0873962	-0.0850543							89	0.136713	-0.0346683	-0.032523
		70	1983.6	0.0733011	-0.0718895	-0.0371043	0.0082678	0.0274249	-0.01341	0.0173422	-0.0411373	0.0848961	0.0924582	0.138334	0.0934664	0.0480944	0.172111	0.0082678	0.0899375	0.0385158	-0.106171	0.0969954	0.0561605	0.043053	-0.0139141	0.0909458	-0.032567	-0.00635209	0.091954	0.07683	0.0435572	0.148921	0.0828796	-0.0880218							90	0.138249	-0.03457	-0.0319374
		75	2115	0.0827423	-0.0851064	-0.0359338	0.0165485	0.0217494	-0.0231678	0.0156028	-0.0501182	0.0997636	0.098818	0.129078	0.0780142	0.0444444	0.157447	0.000472813	0.0931442	0.0439716	-0.115839	0.0799054	0.0373522	0.0345154	-0.0208038	0.0865248	-0.0515366	-0.0217494	0.0817967	0.0591017	0.0335697	0.134279	0.0619385	-0.0969267							91	0.139785	-0.0341588	-0.0314366
		80	2301.8	0.131289	-0.0976627	-0.0546529	-0.00425754	0.0252846	-0.0181597	-0.00469198	-0.0633417	0.150404	0.139977	0.121296	0.0678599	0.0487445	0.156052	-0.0324963	0.123903	0.04831	-0.130246	0.0552611	0.0122513	0.00616909	-0.019463	0.0491789	-0.0607351	-0.0450951	0.0804588	0.0565644	8.68885e-05	0.13042	0.0304979	-0.125467							92	0.141321	-0.0329068	-0.0311445
		85	2676.8	0.191721	-0.129184	-0.0959354	-0.0406455	0.0740436	-0.0163628	-0.0212194	-0.113494	0.182008	0.180888	0.172669	0.0975792	0.0706814	0.19994	-0.0817394	0.163329	0.0901076	-0.166169	0.00343694	-0.0507322	-0.0608189	-0.0320532	0.00754632	-0.124328	-0.106769	0.108413	0.0669456	-0.051853	0.162582	-0.0346683	-0.158697							93	0.142857	-0.0328933	-0.0310282
		90	3355.4	0.205817	-0.141086	-0.0945938	-0.0665792	0.0964416	-0.0406509	-0.0150206	-0.109793	0.246051	0.204327	0.235918	0.149788	0.106276	0.262443	-0.102939	0.198069	0.12237	-0.178637	-0.0144245	-0.0782023	-0.0573404	-0.053168	0.0150802	-0.134529	-0.103535	0.165882	0.119986	-0.0758181	0.233236	-0.0650891	-0.189962							94	0.144393	-0.0327632	-0.0296804
		95	4430.6	0.138221	-0.0425676	-0.0520471	-0.0951564	0.0515506	-0.0190945	0.0429739	-0.0197716	0.191712	0.178847	0.168465	0.0872117	0.0668984	0.204352	-0.0355708	0.130772	0.0711867	-0.143683	0.0102469	-0.00194105	-0.00848644	-0.0157089	0.0386855	-0.0222543	-0.0181917	0.104591	0.0558389	0.0296574	0.163048	-0.0360222	-0.161287							95	0.145929	-0.032567	-0.0295331
	LaSRC	Percentile	Standard	07-19-20	07-09-22	07-01-19	08-02-19	07-17-19	07-06-21	08-07-21	08-10-22	07-01-22	06-23-22	08-11-22	07-17-22	06-15-22	08-02-22	07-10-22	07-12-20	07-28-20	08-11-19	07-02-22	08-04-20	06-20-21	06-13-21	07-10-19	07-31-21	07-26-22	07-18-22	07-26-19	06-26-20	06-16-22	06-24-19	07-15-21							96	0.147465	-0.0324963	-0.0292699
		1	619.2	-0.0713824	0.00452196	0.00936693	0.0626615	-0.00516796	0.0352067	-0.145672	0.0836563	-0.0633075	0.0998062	0.0432817	0.0190568	0.103036	-0.00355297	0.0707364	0.20478	0.0771964	0.141796	0.0981912	0.120801	0.0788114	0.0804264	0.0626615	0.0529716	0.104651	0.149871	0.169251	0.248385	0.2177	0.232235	0.358204							97	0.149002	-0.0320532	-0.0286951
		3	703	-0.0227596	-0.0199147	0.00284495	0.0412518	-0.00142248	0.0384068	-0.0625889	0.0739687	0.0213371	0.103841	0.0753912	0.0483642	0.108108	0.0611664	0.0924609	0.197724	0.083926	0.15505	0.118065	0.108108	0.0668563	0.0725462	0.0554765	0.0654339	0.0896159	0.156472	0.192034	0.194879	0.216216	0.226174	0.29303							98	0.150538	-0.0313245	-0.0280136
		5	765.6	-0.011233	-0.011233	-0.00862069	0.0423197	-0.011233	0.0266458	-0.0438871	0.0658307	0.0214211	0.0788924	0.0723615	0.0370951	0.0775862	0.0801985	0.0710554	0.167712	0.0749739	0.11024	0.102403	0.0971787	0.0684431	0.0501567	0.0619122	0.0606061	0.0828109	0.140282	0.167712	0.178161	0.202978	0.193835	0.247388							99	0.152074	-0.0309649	-0.0278904
		10	878.2	-0.0184468	-0.00478251	0.00546573	0.0464587	-0.0286951	0.0145753	-0.0275564	0.0510134	0.0487361	0.0863129	0.074926	0.0316557	0.0475974	0.0840355	0.0635391	0.14097	0.0589843	0.0624004	0.102255	0.0942838	0.060123	0.0259622	0.04532	0.0589843	0.0612617	0.105671	0.137554	0.159189	0.185379	0.180824	0.189934							100	0.15361	-0.030743	-0.0277879
		15	974.2	0.00184767	-0.00739068	-0.0125231	0.0388011	-0.020735	0.013139	-0.0176555	0.0254568	0.0521454	0.0808869	0.0778074	0.0275098	0.0439335	0.0890987	0.0665161	0.121946	0.042907	0.0388011	0.102443	0.0911517	0.0695956	0.0357216	0.0511189	0.040854	0.0511189	0.0870458	0.129132	0.153767	0.167111	0.161979	0.141449							101	0.155146	-0.0292864	-0.0275564
		20	1064	0.0244361	-0.0253759	-0.0178571	0.0272556	-0.00845865	0.0112782	-0.0328947	0.012218	0.0516917	0.0695489	0.0723684	0.037594	0.0300752	0.0836466	0.0488722	0.110902	0.0451128	0.0178571	0.0958647	0.0883459	0.0733083	0.0159774	0.0601504	0.031015	0.037594	0.0892857	0.114662	0.130639	0.149436	0.137218	0.0996241							102	0.156682	-0.0287381	-0.0270993
		25	1138.8	0.0317878	-0.0296804	-0.0173867	0.0221286	-0.00684932	0.0124693	-0.0314366	0.0151036	0.0607657	0.0835968	0.085353	0.0493502	0.0414471	0.0967685	0.0484721	0.106428	0.0388128	0.0089568	0.0923779	0.0897436	0.0792062	0.0115911	0.062522	0.0238848	0.0484721	0.0967685	0.111697	0.12399	0.146821	0.147699	0.0800843							103	0.158218	-0.0287381	-0.0253759
		30	1217.6	0.0307162	-0.032523	-0.0185611	0.0257884	-0.0054205	0.0142904	-0.0119908	0.00854139	0.0627464	0.0865637	0.106275	0.0496058	0.0405716	0.111202	0.0479632	0.114488	0.0397503	-0.00624179	0.0857424	0.0734231	0.0783509	0.00443495	0.064389	0.0151117	0.0381078	0.098883	0.106275	0.115309	0.158016	0.129271	0.0652102							104	0.159754	-0.0282132	-0.0240864
		35	1303.6	0.0271556	-0.0311445	-0.0150353	0.0240871	-0.0050629	0.00951212	-0.00813133	-0.00122737	0.0678122	0.0862228	0.104633	0.0563056	0.044799	0.125345	0.0509359	0.103866	0.0455661	-0.0227064	0.0969623	0.073182	0.0693464	0.000306843	0.059374	0.00797791	0.0348266	0.108469	0.102332	0.102332	0.152194	0.115373	0.0355937							105	0.16129	-0.0268178	-0.0239486
		40	1400.4	0.0439874	-0.0424165	-0.0238503	0.022565	-0.000285633	0.0132819	-0.00814053	-0.00742645	0.0654099	0.0875464	0.107541	0.0554127	0.0447015	0.121822	0.0482719	0.092545	0.0482719	-0.0367038	0.0961154	0.0632676	0.0632676	0.00185661	0.066838	0.00971151	0.0425593	0.0939732	0.0918309	0.0968295	0.131819	0.110397	0.0175664							106	0.162826	-0.0262172	-0.0238503
		45	1503.4	0.0576028	-0.0534788	-0.0295331	0.0183584	0.00705069	0.00305973	-0.0155647	-0.0215512	0.0709059	0.083544	0.101503	0.0682453	0.0423041	0.124119	0.0290009	0.0888652	0.033657	-0.050153	0.092191	0.054277	0.0595982	-0.000931223	0.0662498	0.000399095	0.0216842	0.0862046	0.0762272	0.0782227	0.118132	0.0955168	0.000399095							107	0.164363	-0.0255941	-0.0234913
		50	1609.4	0.0612651	-0.0592767	-0.0319374	0.0196346	0.0103144	-0.0108115	-0.0139182	-0.0381509	0.0705853	0.0786629	0.105381	0.059401	0.0370324	0.116565	0.0165279	0.0786629	0.0295762	-0.0661116	0.0910898	0.0438673	0.0475954	-0.00459799	0.0606437	-0.0195104	0.00534361	0.0805269	0.0712067	0.059401	0.117187	0.0836337	-0.0195104							108	0.165899	-0.0246839	-0.0227596
		55	1712	0.0660047	-0.0589953	-0.0379673	0.0146028	0.0163551	-0.00992991	-0.0116822	-0.036215	0.0811916	0.083528	0.118575	0.0712617	0.0303738	0.124416	0.0216121	0.0794393	0.0268692	-0.0817757	0.0957944	0.0531542	0.0490654	-0.00116822	0.0712617	-0.0239486	0.0046729	0.0957944	0.0706776	0.0595794	0.114486	0.0811916	-0.0344626							109	0.167435	-0.0244741	-0.0227064
		60	1824.4	0.0606227	-0.0632537	-0.0331068	0.018417	0.0173208	-0.0183074	0.00471388	-0.0363955	0.0765183	0.0874808	0.122561	0.0803552	0.0392458	0.135168	0.0217058	0.0803552	0.0304758	-0.0857268	0.0962508	0.0469195	0.0452752	-0.016663	0.0759702	-0.0292699	0.00252138	0.0858364	0.0672002	0.0529489	0.119272	0.0715852	-0.0490024							110	0.168971	-0.0244216	-0.0220297
		65	1926.4	0.0620847	-0.0645764	-0.0406977	0.0169228	0.0262666	-0.0188953	0.0117317	-0.0417359	0.0828488	0.0797342	0.132683	0.0999792	0.0470307	0.146179	0.0169228	0.0703904	0.0288621	-0.0946844	0.104132	0.0563746	0.0517027	-0.0194145	0.0895972	-0.0240864	0.00498339	0.0906354	0.0657184	0.0542982	0.123858	0.0766196	-0.0578281							111	0.170507	-0.0243902	-0.0215512
		70	2034.8	0.0703755	-0.0711618	-0.0402005	0.00796147	0.0330254	-0.0205426	0.00894437	-0.0402005	0.0846275	0.0875762	0.134264	0.0978966	0.0443287	0.156379	0.00648712	0.0772557	0.0310596	-0.107038	0.0890505	0.045803	0.0408885	-0.0234913	0.0747985	-0.0333202	-0.0038333	0.079713	0.0693926	0.0462945	0.127384	0.0679182	-0.0657558							112	0.172043	-0.0235457	-0.0212066
		75	2169.8	0.079823	-0.0787169	-0.0386211	0.0143792	0.0231358	-0.0270993	0.00746613	-0.0492211	0.0931883	0.0918057	0.126832	0.0821274	0.0447968	0.144806	-0.00313393	0.076136	0.0360402	-0.11743	0.0710665	0.0226749	0.0268227	-0.0330906	0.0646143	-0.0487603	-0.0220297	0.0683012	0.0549359	0.0263619	0.10978	0.0424924	-0.0870126							113	0.173579	-0.0231678	-0.020735
		80	2356	0.122666	-0.0891341	-0.0564516	-0.00339559	0.0263158	-0.0203735	-0.0148557	-0.0657895	0.144312	0.131154	0.120543	0.073854	0.0428693	0.145161	-0.0335314	0.106961	0.0377759	-0.132428	0.0424448	-0.00254669	0.000848896	-0.0280136	0.0288625	-0.0573005	-0.0475382	0.0649406	0.0432937	-0.00382003	0.0933786	0.00679117	-0.117997							114	0.175115	-0.0226707	-0.0205426
		85	2735	0.186837	-0.120293	-0.0987203	-0.0413163	0.0734918	-0.0212066	-0.0277879	-0.114077	0.170384	0.16234	0.170018	0.095064	0.0559415	0.187203	-0.088117	0.131261	0.0709324	-0.171846	-0.00694698	-0.0639854	-0.0680073	-0.050457	-0.00219378	-0.122121	-0.114442	0.0862888	0.0478976	-0.0588665	0.109689	-0.0669104	-0.165631							115	0.176651	-0.0224117	-0.020456
		90	3409.8	0.198311	-0.13602	-0.094375	-0.0635814	0.0956654	-0.0471582	-0.0195906	-0.111092	0.229691	0.178662	0.213268	0.138483	0.0774826	0.23233	-0.108159	0.157839	0.0827615	-0.189102	-0.0310282	-0.0905625	-0.0647545	-0.0788316	-0.00580679	-0.143058	-0.116077	0.124406	0.083348	-0.0885096	0.174262	-0.091149	-0.209045							116	0.178187	-0.0222543	-0.0203735
		95	4438.8	0.127782	-0.0384789	-0.0459133	-0.0846625	0.0412724	-0.0278904	0.0390196	-0.0154997	0.168784	0.150536	0.151212	0.0784446	0.0405966	0.173515	-0.0528972	0.0975939	0.0399207	-0.163738	-0.00671353	-0.020456	-0.0161755	-0.0526719	0.0119852	-0.0420834	-0.0438857	0.0624493	0.0176174	-0.00288366	0.0960169	-0.0637109	-0.202262							117	0.179724	-0.0222032	-0.0199147
																																									118	0.18126	-0.0219378	-0.0195906
																																									119	0.182796	-0.0217494	-0.0195104
	Table 3		Rochester		Green Band 3			Copied values from the Error Table above converted to absolute values that are then averaged														These data feed to "a -Low refl% Error Distr L8-9.xlsx"																			120	0.184332	-0.0216737	-0.0195104
																																									121	0.185868	-0.0213493	-0.0194145
			Cum. %	890	891	892	893	898	903	904	908	912	916	932	934	937	942	944	945	950	951	954	957	959	962	973	974	982	994	995	996	1009	1018	1062	<-- Image Atm-I						122	0.187404	-0.0212194	-0.0188953
	CMAC		1	0.00102145	-0.0262172	0.00272387	0.0708206	-0.0483487	0.0214505	-0.0313245	0.0435819	-0.00919305	0.0674157	0.0674157	-0.0568607	0.0469867	0.0537964	0.0589036	0.171263	0.0061287	0.0486891	0.0589036	0.0554988	0.0810351	-0.00749064	0.0299625	-0.0194076	0.0231529	0.0623085	0.106571	0.159346	0.198502	0.178073	0.103166							123	0.18894	-0.0208038	-0.0185611
			3	0.00541842	-0.0367249	-0.0111379	0.0596026	-0.0171583	0.0445515	-0.0246839	0.0550873	0.0295003	0.064118	0.0415412	-0.0216737	0.0460566	0.0701385	0.0611078	0.139374	0.012944	0.0776641	0.0580975	0.0821794	0.0611078	0.0114389	0.0219747	-0.0156532	0.0144491	0.0942203	0.100241	0.115292	0.183022	0.145394	0.0927152							124	0.190476	-0.0205778	-0.0184468
			5	0.0132707	-0.0309649	-0.00470003	0.045065	-0.0226707	0.0326237	-0.0364943	0.045065	0.0174177	0.0519768	0.0671827	-0.0268178	0.0174177	0.0630357	0.0395355	0.112801	0.0160354	0.0353884	0.0616533	0.0685651	0.0436826	-0.00470003	0.029859	-0.019906	0.00912358	0.0602709	0.0713298	0.0865358	0.157036	0.129389	0.0630357							125	0.192012	-0.019906	-0.0183074
			10	0.0115746	-0.0282132	0.0115746	0.0429226	-0.0378587	0.0151917	0.000723415	0.0284543	0.0356884	0.0730649	0.0670364	-0.00771642	0.0115746	0.0670364	0.0417169	0.102001	0.0248372	0.00434049	0.0622136	0.0742706	0.0441283	-0.0125392	0.0308657	0.000723415	0.0115746	0.0537738	0.0694478	0.105619	0.145406	0.133349	0.0332771							126	0.193548	-0.0197716	-0.0178571
			15	0.0177182	-0.0287381	0.000432152	0.0393258	-0.0287381	0.0133967	-0.0103717	0.0144771	0.0458081	0.0609334	0.0717373	-0.0103717	0.00907519	0.0857822	0.0490493	0.0922645	0.019879	-0.00280899	0.0814607	0.0803803	0.0544512	-0.000648228	0.0393258	-0.00713051	0.00259291	0.0490493	0.0630942	0.0922645	0.13656	0.125756	0.00799481							127	0.195084	-0.0195884	-0.0176555
			20	0.0298773	-0.0393748	0.00613376	0.0239414	-0.0205778	0.0091017	-0.0235457	0.0110803	0.0437277	0.0625247	0.0872576	0.0150376	0.013059	0.0922042	0.0466957	0.0912149	0.0249307	-0.0195884	0.0842897	0.0734072	0.063514	-0.00672734	0.0457064	-0.00474871	0.00712307	0.0625247	0.0615354	0.0833004	0.123862	0.114958	-0.0166205							128	0.196621	-0.019463	-0.0173867
			Avg Abs.Value of Error --->	0.0131468	0.0317055	0.00611705	0.0469463	0.0292254	0.0227193	0.0211906	0.0329576	0.0302226	0.0633389	0.0670285	0.0230797	0.0240283	0.0719989	0.0495015	0.118153	0.0174592	0.0314133	0.0677697	0.0723836	0.0579865	0.00725739	0.032949	0.0112616	0.011336	0.0636913	0.0787032	0.10706	0.157398	0.13782	0.0528016							129	0.198157	-0.0194076	-0.016663
																																									130	0.199693	-0.0190945	-0.0161755
																																									131	0.201229	-0.0185185	-0.0155647
				890	891	892	893	898	903	904	908	912	916	932	934	937	942	944	945	950	951	954	957	959	962	973	974	982	994	995	996	1009	1018	1062	<-- Image Atm-I						132	0.202765	-0.0182815	-0.0154997
	LaSRC		1	-0.0713824	0.00452196	0.00936693	0.0626615	-0.00516796	0.0352067	-0.145672	0.0836563	-0.0633075	0.0998062	0.0432817	0.0190568	0.103036	-0.00355297	0.0707364	0.20478	0.0771964	0.141796	0.0981912	0.120801	0.0788114	0.0804264	0.0626615	0.0529716	0.104651	0.149871	0.169251	0.248385	0.2177	0.232235	0.358204							133	0.204301	-0.0181917	-0.0150353
			3	-0.0227596	-0.0199147	0.00284495	0.0412518	-0.00142248	0.0384068	-0.0625889	0.0739687	0.0213371	0.103841	0.0753912	0.0483642	0.108108	0.0611664	0.0924609	0.197724	0.083926	0.15505	0.118065	0.108108	0.0668563	0.0725462	0.0554765	0.0654339	0.0896159	0.156472	0.192034	0.194879	0.216216	0.226174	0.29303							134	0.205837	-0.0181597	-0.0148557
			5	-0.011233	-0.011233	-0.00862069	0.0423197	-0.011233	0.0266458	-0.0438871	0.0658307	0.0214211	0.0788924	0.0723615	0.0370951	0.0775862	0.0801985	0.0710554	0.167712	0.0749739	0.11024	0.102403	0.0971787	0.0684431	0.0501567	0.0619122	0.0606061	0.0828109	0.140282	0.167712	0.178161	0.202978	0.193835	0.247388							135	0.207373	-0.017458	-0.0139182
			10	-0.0184468	-0.00478251	0.00546573	0.0464587	-0.0286951	0.0145753	-0.0275564	0.0510134	0.0487361	0.0863129	0.074926	0.0316557	0.0475974	0.0840355	0.0635391	0.14097	0.0589843	0.0624004	0.102255	0.0942838	0.060123	0.0259622	0.04532	0.0589843	0.0612617	0.105671	0.137554	0.159189	0.185379	0.180824	0.189934							136	0.208909	-0.0171583	-0.0125231
			15	0.00184767	-0.00739068	-0.0125231	0.0388011	-0.020735	0.013139	-0.0176555	0.0254568	0.0521454	0.0808869	0.0778074	0.0275098	0.0439335	0.0890987	0.0665161	0.121946	0.042907	0.0388011	0.102443	0.0911517	0.0695956	0.0357216	0.0511189	0.040854	0.0511189	0.0870458	0.129132	0.153767	0.167111	0.161979	0.141449							137	0.210445	-0.0171282	-0.0119908
			20	0.0244361	-0.0253759	-0.0178571	0.0272556	-0.00845865	0.0112782	-0.0328947	0.012218	0.0516917	0.0695489	0.0723684	0.037594	0.0300752	0.0836466	0.0488722	0.110902	0.0451128	0.0178571	0.0958647	0.0883459	0.0733083	0.0159774	0.0601504	0.031015	0.037594	0.0892857	0.114662	0.130639	0.149436	0.137218	0.0996241							138	0.211982	-0.0166205	-0.0116822
			Avg Abs.Value of Error --->	0.0250176	0.0122031	0.00944642	0.0431247	0.0126187	0.0232086	0.0550424	0.052024	0.0431065	0.086548	0.069356	0.0335459	0.0683894	0.0669498	0.0688633	0.157339	0.0638501	0.0876908	0.103204	0.0999782	0.0695229	0.0467984	0.0561066	0.0516441	0.0711754	0.121438	0.151724	0.177503	0.189804	0.188711	0.221605							139	0.213518	-0.0163934	-0.011233
																																									140	0.215054	-0.0163628	-0.011233
																																									141	0.21659	-0.0157089	-0.011233
																																									142	0.218126	-0.0156532	-0.0108115
																																									143	0.219662	-0.0150206	-0.00992991
																																									144	0.221198	-0.0145175	-0.00862069
																																									145	0.222734	-0.0144245	-0.00845865
																																									146	0.22427	-0.0140741	-0.00814053
																																									147	0.225806	-0.0139267	-0.00813133
																																									148	0.227343	-0.0139141	-0.00742645
																																									149	0.228879	-0.0134745	-0.00739068
																																									150	0.230415	-0.01341	-0.00694698
																																									151	0.231951	-0.0133333	-0.00684932
																																									152	0.233487	-0.0130985	-0.00671353
																																									153	0.235023	-0.0125392	-0.00624179
																																									154	0.236559	-0.0120995	-0.00580679
																																									155	0.238095	-0.0119693	-0.0054205
																																									156	0.239631	-0.011883	-0.00516796
																																									157	0.241167	-0.0111379	-0.0050629
																																									158	0.242704	-0.0111111	-0.00478251
																																									159	0.24424	-0.0109689	-0.00459799
																																									160	0.245776	-0.0107251	-0.0038333
																																									161	0.247312	-0.0103717	-0.00382003
																																									162	0.248848	-0.0103717	-0.00355297
																																									163	0.250384	-0.00919305	-0.00339559
																																									164	0.25192	-0.00899743	-0.00313393
																																									165	0.253456	-0.00899743	-0.00288366
																																									166	0.254992	-0.00848644	-0.00254669
																																									167	0.256528	-0.00814815	-0.00219378
																																									168	0.258065	-0.00807034	-0.00142248
																																									169	0.259601	-0.00771642	-0.00122737
																																									170	0.261137	-0.00752361	-0.00116822
																																									171	0.262673	-0.00749064	-0.000931223
																																									172	0.264209	-0.00713051	-0.000285633
																																									173	0.265745	-0.00672734	0.000306843
																																									174	0.267281	-0.00635209	0.000399095
																																									175	0.268817	-0.00578406	0.000399095
																																									176	0.270353	-0.00512383	0.000848896
																																									177	0.271889	-0.00474871	0.00184767
																																									178	0.273425	-0.00470003	0.00185661
																																									179	0.274962	-0.00470003	0.00252138
																																									180	0.276498	-0.00469198	0.00284495
																																									181	0.278034	-0.00445676	0.00305973
																																									182	0.27957	-0.00445676	0.00443495
																																									183	0.281106	-0.00425754	0.00452196
																																									184	0.282642	-0.00385604	0.0046729
																																									185	0.284178	-0.00365631	0.00471388
																																									186	0.285714	-0.00316238	0.00498339
																																									187	0.28725	-0.00280899	0.00534361
																																									188	0.288786	-0.00256191	0.00546573
																																									189	0.290323	-0.00256191	0.00648712
																																									190	0.291859	-0.00194105	0.00679117
																																									191	0.293395	-0.00180668	0.00705069
																																									192	0.294931	-0.000648228	0.00746613
																																									193	0.296467	-0.000320154	0.00796147
																																									194	0.298003	-0.000240906	0.00797791
																																									195	0.299539	0	0.00854139
																																									196	0.301075	8.68885e-05	0.00894437
																																									197	0.302611	0.000432152	0.0089568
																																									198	0.304147	0.000472813	0.00936693
																																									199	0.305684	0.000723415	0.00951212
																																									200	0.30722	0.000723415	0.00971151
																																									201	0.308756	0.000853971	0.0103144
																																									202	0.310292	0.000914077	0.0112782
																																									203	0.311828	0.00102145	0.0115911
																																									204	0.313364	0.00170321	0.0117317
																																									205	0.3149	0.002081	0.0119852
																																									206	0.316436	0.00259291	0.012218
																																									207	0.317972	0.00272387	0.0124693
																																									208	0.319508	0.00343694	0.013139
																																									209	0.321045	0.00365631	0.0132819
																																									210	0.322581	0.00371236	0.0142904
																																									211	0.324117	0.00434049	0.0143792
																																									212	0.325653	0.00541842	0.0145753
																																									213	0.327189	0.00577478	0.0146028
																																									214	0.328725	0.0061287	0.0151036
																																									215	0.330261	0.00613376	0.0151117
																																									216	0.331797	0.00616909	0.0159774
																																									217	0.333333	0.00666667	0.0163551
																																									218	0.334869	0.00712307	0.0165279
																																									219	0.336406	0.00754632	0.0169228
																																									220	0.337942	0.00799481	0.0169228
																																									221	0.339478	0.0082678	0.0173208
																																									222	0.341014	0.0082678	0.0175664
																																									223	0.34255	0.00835476	0.0176174
																																									224	0.344086	0.00848407	0.0178571
																																									225	0.345622	0.00907519	0.0183584
																																									226	0.347158	0.0091017	0.018417
																																									227	0.348694	0.00912358	0.0190568
																																									228	0.35023	0.00928446	0.0196346
																																									229	0.351767	0.0102469	0.0213371
																																									230	0.353303	0.0109689	0.0214211
																																									231	0.354839	0.0110803	0.0216121
																																									232	0.356375	0.0111016	0.0216842
																																									233	0.357911	0.0111789	0.0217058
																																									234	0.359447	0.0114389	0.0221286
																																									235	0.360983	0.0115746	0.022565
																																									236	0.362519	0.0115746	0.0226749
																																									237	0.364055	0.0115746	0.0231358
																																									238	0.365591	0.0115746	0.0238848
																																									239	0.367127	0.0122513	0.0240871
																																									240	0.368664	0.0128726	0.0244361
																																									241	0.3702	0.012944	0.0254568
																																									242	0.371736	0.013059	0.0257884
																																									243	0.373272	0.0132707	0.0259622
																																									244	0.374808	0.0133967	0.0262666
																																									245	0.376344	0.0142134	0.0263158
																																									246	0.37788	0.0144491	0.0263619
																																									247	0.379416	0.0144771	0.0266458
																																									248	0.380952	0.0150376	0.0268227
																																									249	0.382488	0.0150802	0.0268692
																																									250	0.384025	0.0151917	0.0271556
																																									251	0.385561	0.0155418	0.0272556
																																									252	0.387097	0.0156028	0.0275098
																																									253	0.388633	0.0160354	0.0288621
																																									254	0.390169	0.0162963	0.0288625
																																									255	0.391705	0.0164534	0.0290009
																																									256	0.393241	0.0165485	0.0295762
																																									257	0.394777	0.0166063	0.0300752
																																									258	0.396313	0.017037	0.0303738
																																									259	0.397849	0.0173422	0.0304758
																																									260	0.399386	0.0173675	0.0307162
																																									261	0.400922	0.0174177	0.031015
																																									262	0.402458	0.0174177	0.0310596
																																									263	0.403994	0.0176709	0.0316557
																																									264	0.40553	0.0177182	0.0317878
																																									265	0.407066	0.0184293	0.0330254
																																									266	0.408602	0.0185185	0.033657
																																									267	0.410138	0.0191956	0.0348266
																																									268	0.411674	0.0191956	0.0352067
																																									269	0.41321	0.019879	0.0355937
																																									270	0.414747	0.0202117	0.0357216
																																									271	0.416283	0.0205656	0.0360402
																																									272	0.417819	0.0208992	0.0370324
																																									273	0.419355	0.0214505	0.0370951
																																									274	0.420891	0.0217494	0.037594
																																									275	0.422427	0.0219747	0.037594
																																									276	0.423963	0.0222032	0.0377759
																																									277	0.425499	0.0231362	0.0381078
																																									278	0.427035	0.0231529	0.0384068
																																									279	0.428571	0.0232474	0.0388011
																																									280	0.430108	0.0235257	0.0388011
																																									281	0.431644	0.0236914	0.0388128
																																									282	0.43318	0.0239414	0.0390196
																																									283	0.434716	0.0248372	0.0392458
																																									284	0.436252	0.0249307	0.0397503
																																									285	0.437788	0.0250542	0.0399207
																																									286	0.439324	0.0252846	0.0405716
																																									287	0.44086	0.0256191	0.0405966
																																									288	0.442396	0.0257069	0.040854
																																									289	0.443932	0.0269874	0.0408885
																																									290	0.445469	0.0270865	0.0412518
																																									291	0.447005	0.0273271	0.0412724
																																									292	0.448541	0.0274249	0.0414471
																																									293	0.450077	0.0284543	0.0423041
																																									294	0.451613	0.029035	0.0423197
																																									295	0.453149	0.0295003	0.0424448
																																									296	0.454685	0.0296574	0.0424924
																																									297	0.456221	0.029859	0.0425593
																																									298	0.457757	0.0298773	0.0428693
																																									299	0.459293	0.0299625	0.042907
																																									300	0.460829	0.0300944	0.0432817
																																									301	0.462366	0.0304979	0.0432937
																																									302	0.463902	0.0308657	0.0438673
																																									303	0.465438	0.0309395	0.0439335
																																									304	0.466974	0.0311111	0.0439874
																																									305	0.46851	0.0315969	0.0443287
																																									306	0.470046	0.0321337	0.0447015
																																									307	0.471582	0.0326237	0.0447968
																																									308	0.473118	0.0329068	0.044799
																																									309	0.474654	0.0332771	0.0451128
																																									310	0.47619	0.0335697	0.0452752
																																									311	0.477727	0.0345154	0.04532
																																									312	0.479263	0.034703	0.0455661
																																									313	0.480799	0.0347349	0.045803
																																									314	0.482335	0.0352927	0.0462945
																																									315	0.483871	0.0353884	0.0464587
																																									316	0.485407	0.0356884	0.0469195
																																									317	0.486943	0.0367111	0.0470307
																																									318	0.488479	0.037037	0.0475954
																																									319	0.490015	0.0373522	0.0475974
																																									320	0.491551	0.0380983	0.0478976
																																									321	0.493088	0.0385158	0.0479632
																																									322	0.494624	0.0386855	0.0482719
																																									323	0.49616	0.0393258	0.0482719
																																									324	0.497696	0.0393258	0.0483642
																																									325	0.499232	0.0395355	0.0484721
																																									326	0.500768	0.0396991	0.0484721
																																									327	0.502304	0.04	0.0487361
																																									328	0.50384	0.0410901	0.0488722
																																									329	0.505376	0.0412998	0.0490654
																																									330	0.506912	0.0415412	0.0493502
																																									331	0.508449	0.0417169	0.0496058
																																									332	0.509985	0.0418446	0.0501567
																																									333	0.511521	0.0422222	0.0509359
																																									334	0.513057	0.0427958	0.0510134
																																									335	0.514593	0.0429006	0.0511189
																																									336	0.516129	0.0429226	0.0511189
																																									337	0.517665	0.0429739	0.0516917
																																									338	0.519201	0.043053	0.0517027
																																									339	0.520737	0.0430591	0.0521454
																																									340	0.522273	0.0435572	0.0529489
																																									341	0.52381	0.0435819	0.0529716
																																									342	0.525346	0.0436826	0.0531542
																																									343	0.526882	0.0437277	0.054277
																																									344	0.528418	0.0439716	0.0542982
																																									345	0.529954	0.0441283	0.0549359
																																									346	0.53149	0.0444444	0.0554127
																																									347	0.533026	0.0445515	0.0554765
																																									348	0.534562	0.0450542	0.0559415
																																									349	0.536098	0.045065	0.0563056
																																									350	0.537634	0.045065	0.0563746
																																									351	0.539171	0.0456298	0.0576028
																																									352	0.540707	0.0457064	0.0589843
																																									353	0.542243	0.0458081	0.0589843
																																									354	0.543779	0.0460566	0.059374
																																									355	0.545315	0.0466957	0.059401
																																									356	0.546851	0.0469867	0.059401
																																									357	0.548387	0.0470232	0.0595794
																																									358	0.549923	0.047338	0.0595982
																																									359	0.551459	0.0480944	0.060123
																																									360	0.552995	0.04831	0.0601504
																																									361	0.554531	0.0483982	0.0606061
																																									362	0.556068	0.0486891	0.0606227
																																									363	0.557604	0.0487445	0.0606437
																																									364	0.55914	0.0490493	0.0607657
																																									365	0.560676	0.0490493	0.0611664
																																									366	0.562212	0.0491789	0.0612617
																																									367	0.563748	0.0493601	0.0612651
																																									368	0.565284	0.0495709	0.0619122
																																									369	0.56682	0.0501384	0.0620847
																																									370	0.568356	0.0503843	0.0624004
																																									371	0.569892	0.0507712	0.0624493
																																									372	0.571429	0.0509516	0.062522
																																									373	0.572965	0.0511111	0.0626615
																																									374	0.574501	0.0512383	0.0626615
																																									375	0.576037	0.0515506	0.0627464
																																									376	0.577573	0.0519768	0.0632676
																																									377	0.579109	0.0520566	0.0632676
																																									378	0.580645	0.0521561	0.0635391
																																									379	0.582181	0.0527997	0.064389
																																									380	0.583717	0.0537738	0.0646143
																																									381	0.585253	0.0537964	0.0649406
																																									382	0.58679	0.0539305	0.0652102
																																									383	0.588326	0.0544512	0.0654099
																																									384	0.589862	0.0545855	0.0654339
																																									385	0.591398	0.0546272	0.0657184
																																									386	0.592934	0.0550873	0.0658307
																																									387	0.59447	0.0552168	0.0660047
																																									388	0.596006	0.0552611	0.0662498
																																									389	0.597542	0.0554988	0.0665161
																																									390	0.599078	0.0555556	0.066838
																																									391	0.600614	0.0557067	0.0668563
																																									392	0.602151	0.0558389	0.0672002
																																									393	0.603687	0.0561605	0.0678122
																																									394	0.605223	0.0565644	0.0679182
																																									395	0.606759	0.0573353	0.0682453
																																									396	0.608295	0.0580975	0.0683012
																																									397	0.609831	0.0581788	0.0684431
																																									398	0.611367	0.0589036	0.0693464
																																									399	0.612903	0.0589036	0.0693926
																																									400	0.614439	0.0591017	0.0695489
																																									401	0.615975	0.0593978	0.0695956
																																									402	0.617512	0.059415	0.0703755
																																									403	0.619048	0.0596026	0.0703904
																																									404	0.620584	0.0597087	0.0705853
																																									405	0.62212	0.0600852	0.0706776
																																									406	0.623656	0.0602709	0.0707364
																																									407	0.625192	0.0603291	0.0709059
																																									408	0.626728	0.0604113	0.0709324
																																									409	0.628264	0.0609334	0.0710554
																																									410	0.6298	0.0611078	0.0710665
																																									411	0.631336	0.0611078	0.0712067
																																									412	0.632873	0.0612431	0.0712617
																																									413	0.634409	0.0614859	0.0712617
																																									414	0.635945	0.0615354	0.0715852
																																									415	0.637481	0.0616533	0.0723615
																																									416	0.639017	0.061848	0.0723684
																																									417	0.640553	0.0619385	0.0725462
																																									418	0.642089	0.0619919	0.073182
																																									419	0.643625	0.0622136	0.0733083
																																									420	0.645161	0.0623085	0.0734231
																																									421	0.646697	0.0623399	0.0734918
																																									422	0.648233	0.0625247	0.073854
																																									423	0.64977	0.0625247	0.0739687
																																									424	0.651306	0.062963	0.0747985
																																									425	0.652842	0.0630357	0.074926
																																									426	0.654378	0.0630357	0.0749739
																																									427	0.655914	0.0630942	0.0753912
																																									428	0.65745	0.063514	0.0759702
																																									429	0.658986	0.0635226	0.076136
																																									430	0.660522	0.0635991	0.0762272
																																									431	0.662058	0.064118	0.0765183
																																									432	0.663594	0.0648148	0.0766196
																																									433	0.665131	0.0650415	0.0771964
																																									434	0.666667	0.0650415	0.0772557
																																									435	0.668203	0.0651852	0.0774826
																																									436	0.669739	0.0659259	0.0775862
																																									437	0.671275	0.0667276	0.0778074
																																									438	0.672811	0.0668984	0.0782227
																																									439	0.674347	0.0669456	0.0783509
																																									440	0.675883	0.0670364	0.0784446
																																									441	0.677419	0.0670364	0.0786629
																																									442	0.678955	0.0671827	0.0786629
																																									443	0.680492	0.0674157	0.0788114
																																									444	0.682028	0.0674157	0.0788924
																																									445	0.683564	0.0674807	0.0792062
																																									446	0.6851	0.0674807	0.0794393
																																									447	0.686636	0.0676417	0.079713
																																									448	0.688172	0.0678599	0.0797342
																																									449	0.689708	0.0685129	0.079823
																																									450	0.691244	0.0685651	0.0800843
																																									451	0.69278	0.0690195	0.0801985
																																									452	0.694316	0.0691716	0.0803552
																																									453	0.695853	0.0694478	0.0803552
																																									454	0.697389	0.0701385	0.0804264
																																									455	0.698925	0.0703974	0.0805269
																																									456	0.700461	0.0703974	0.0808869
																																									457	0.701997	0.0706814	0.0811916
																																									458	0.703533	0.0708206	0.0811916
																																									459	0.705069	0.070914	0.0821274
																																									460	0.706605	0.0711867	0.0827615
																																									461	0.708141	0.0713298	0.0828109
																																									462	0.709677	0.0714286	0.0828488
																																									463	0.711214	0.0717373	0.083348
																																									464	0.71275	0.0718519	0.083528
																																									465	0.714286	0.0725875	0.083544
																																									466	0.715822	0.0730649	0.0835968
																																									467	0.717358	0.0733011	0.0836337
																																									468	0.718894	0.0733333	0.0836466
																																									469	0.72043	0.0734072	0.0836563
																																									470	0.721966	0.0740436	0.083926
																																									471	0.723502	0.0742706	0.0840355
																																									472	0.725038	0.075542	0.0846275
																																									473	0.726575	0.0758355	0.085353
																																									474	0.728111	0.0760034	0.0857424
																																									475	0.729647	0.0761066	0.0858364
																																									476	0.731183	0.0765167	0.0862046
																																									477	0.732719	0.07683	0.0862228
																																									478	0.734255	0.0776641	0.0862888
																																									479	0.735791	0.0776965	0.0863129
																																									480	0.737327	0.0777778	0.0865637
																																									481	0.738863	0.0780142	0.0870458
																																									482	0.740399	0.0786557	0.0874808
																																									483	0.741935	0.0794193	0.0875464
																																									484	0.743472	0.0795247	0.0875762
																																									485	0.745008	0.0797183	0.0883459
																																									486	0.746544	0.0799054	0.0888652
																																									487	0.74808	0.0803803	0.0890505
																																									488	0.749616	0.0804588	0.0890987
																																									489	0.751152	0.0804769	0.0892857
																																									490	0.752688	0.0807095	0.0895972
																																									491	0.754224	0.0810351	0.0896159
																																									492	0.75576	0.0811272	0.0897436
																																									493	0.757296	0.0811879	0.0906354
																																									494	0.758833	0.0814607	0.0910898
																																									495	0.760369	0.0815414	0.0911517
																																									496	0.761905	0.0817967	0.0918057
																																									497	0.763441	0.0820737	0.0918309
																																									498	0.764977	0.0821794	0.092191
																																									499	0.766513	0.0827423	0.0923779
																																									500	0.768049	0.0828796	0.0924609
																																									501	0.769585	0.0828817	0.092545
																																									502	0.771121	0.0829198	0.0931883
																																									503	0.772657	0.0833004	0.0933786
																																									504	0.774194	0.0840761	0.0939732
																																									505	0.77573	0.0840951	0.0942838
																																									506	0.777266	0.0841902	0.095064
																																									507	0.778802	0.0842897	0.0955168
																																									508	0.780338	0.0848329	0.0956654
																																									509	0.781874	0.0848961	0.0957944
																																									510	0.78341	0.0854756	0.0957944
																																									511	0.784946	0.0857822	0.0958647
																																									512	0.786482	0.0859259	0.0960169
																																									513	0.788018	0.0865248	0.0961154
																																									514	0.789555	0.0865358	0.0962508
																																									515	0.791091	0.0870874	0.0967685
																																									516	0.792627	0.0872117	0.0967685
																																									517	0.794163	0.0872576	0.0968295
																																									518	0.795699	0.0873962	0.0969623
																																									519	0.797235	0.0876897	0.0971787
																																									520	0.798771	0.0884607	0.0975939
																																									521	0.800307	0.0890921	0.0978966
																																									522	0.801843	0.0896466	0.0981912
																																									523	0.803379	0.0899375	0.098883
																																									524	0.804916	0.0901076	0.0996241
																																									525	0.806452	0.0903341	0.0998062
																																									526	0.807988	0.0904936	0.0999792
																																									527	0.809524	0.0909236	0.101503
																																									528	0.81106	0.0909458	0.102255
																																									529	0.812596	0.0911111	0.102332
																																									530	0.814132	0.0912149	0.102332
																																									531	0.815668	0.0917091	0.102403
																																									532	0.817204	0.0919023	0.102443
																																									533	0.81874	0.0919151	0.103036
																																									534	0.820276	0.091954	0.103841
																																									535	0.821813	0.0922042	0.103866
																																									536	0.823349	0.0922645	0.104132
																																									537	0.824885	0.0922645	0.104633
																																									538	0.826421	0.0923218	0.104651
																																									539	0.827957	0.0924582	0.105381
																																									540	0.829493	0.0925078	0.105671
																																									541	0.831029	0.0925926	0.106275
																																									542	0.832565	0.0927152	0.106275
																																									543	0.834101	0.0931442	0.106428
																																									544	0.835637	0.0933248	0.106961
																																									545	0.837174	0.0934664	0.107541
																																									546	0.83871	0.0941734	0.108108
																																									547	0.840246	0.0942203	0.108108
																																									548	0.841782	0.09538	0.108469
																																									549	0.843318	0.09538	0.109689
																																									550	0.844854	0.0964416	0.10978
																																									551	0.84639	0.0969954	0.11024
																																									552	0.847926	0.0975792	0.110397
																																									553	0.849462	0.0978963	0.110902
																																									554	0.850998	0.098818	0.111202
																																									555	0.852535	0.099735	0.111697
																																									556	0.854071	0.0997636	0.114486
																																									557	0.855607	0.0999146	0.114488
																																									558	0.857143	0.100241	0.114662
																																									559	0.858679	0.102001	0.115309
																																									560	0.860215	0.102222	0.115373
																																									561	0.861751	0.102828	0.116565
																																									562	0.863287	0.102929	0.117187
																																									563	0.864823	0.103166	0.118065
																																									564	0.866359	0.103207	0.118132
																																									565	0.867896	0.104591	0.118575
																																									566	0.869432	0.105185	0.119272
																																									567	0.870968	0.105619	0.120543
																																									568	0.872504	0.105892	0.120801
																																									569	0.87404	0.106276	0.121822
																																									570	0.875576	0.106571	0.121946
																																									571	0.877112	0.106746	0.122561
																																									572	0.878648	0.108413	0.122666
																																									573	0.880184	0.108532	0.123858
																																									574	0.88172	0.108532	0.12399
																																									575	0.883257	0.110283	0.124119
																																									576	0.884793	0.11187	0.124406
																																									577	0.886329	0.112431	0.124416
																																									578	0.887865	0.112801	0.125345
																																									579	0.889401	0.114958	0.126832
																																									580	0.890937	0.115292	0.127384
																																									581	0.892473	0.119986	0.127782
																																									582	0.894009	0.121296	0.129132
																																									583	0.895545	0.122108	0.129271
																																									584	0.897081	0.12237	0.130639
																																									585	0.898618	0.123826	0.131154
																																									586	0.900154	0.123862	0.131261
																																									587	0.90169	0.123903	0.131819
																																									588	0.903226	0.12402	0.132683
																																									589	0.904762	0.124428	0.134264
																																									590	0.906298	0.124444	0.135168
																																									591	0.907834	0.125756	0.137218
																																									592	0.90937	0.125964	0.137554
																																									593	0.910906	0.126667	0.138483
																																									594	0.912442	0.127484	0.140282
																																									595	0.913978	0.129078	0.14097
																																									596	0.915515	0.129389	0.141449
																																									597	0.917051	0.130208	0.141796
																																									598	0.918587	0.13042	0.144312
																																									599	0.920123	0.130772	0.144806
																																									600	0.921659	0.131289	0.145161
																																									601	0.923195	0.131655	0.146179
																																									602	0.924731	0.131743	0.146821
																																									603	0.926267	0.132106	0.147699
																																									604	0.927803	0.133349	0.149436
																																									605	0.929339	0.134279	0.149871
																																									606	0.930876	0.13656	0.150536
																																									607	0.932412	0.137647	0.151212
																																									608	0.933948	0.138221	0.152194
																																									609	0.935484	0.138334	0.153767
																																									610	0.93702	0.13894	0.15505
																																									611	0.938556	0.139374	0.156379
																																									612	0.940092	0.139977	0.156472
																																									613	0.941628	0.140089	0.157839
																																									614	0.943164	0.145175	0.158016
																																									615	0.9447	0.145394	0.159189
																																									616	0.946237	0.145406	0.161979
																																									617	0.947773	0.14615	0.16234
																																									618	0.949309	0.148921	0.167111
																																									619	0.950845	0.149788	0.167712
																																									620	0.952381	0.150404	0.167712
																																									621	0.953917	0.156052	0.168784
																																									622	0.955453	0.156843	0.169251
																																									623	0.956989	0.157036	0.170018
																																									624	0.958525	0.157447	0.170384
																																									625	0.960061	0.159251	0.173515
																																									626	0.961598	0.159346	0.174262
																																									627	0.963134	0.162582	0.178161
																																									628	0.96467	0.163048	0.178662
																																									629	0.966206	0.163329	0.180824
																																									630	0.967742	0.165882	0.185379
																																									631	0.969278	0.168465	0.186837
																																									632	0.970814	0.171263	0.187203
																																									633	0.97235	0.172111	0.189934
																																									634	0.973886	0.172669	0.192034
																																									635	0.975422	0.178073	0.193835
																																									636	0.976959	0.178847	0.194879
																																									637	0.978495	0.180888	0.197724
																																									638	0.980031	0.182008	0.198311
																																									639	0.981567	0.183022	0.202978
																																									640	0.983103	0.191712	0.20478
																																									641	0.984639	0.191721	0.213268
																																									642	0.986175	0.198069	0.216216
																																									643	0.987711	0.198502	0.2177
																																									644	0.989247	0.19994	0.226174
																																									645	0.990783	0.204327	0.229691
																																									646	0.99232	0.204352	0.232235
																																									647	0.993856	0.205817	0.23233
																																									648	0.995392	0.233236	0.247388
																																									649	0.996928	0.235918	0.248385
																																									650	0.998464	0.246051	0.29303
																																									651	1	0.262443	0.358204

## Sheet: B4
B3
			There are four tables in this spreadsheet. The three stacked below examine (1) statistics of precision, (2) assessment and error, and (3) preparation of data for examination of error for low reflectance data. The last table (scroll to the right) ranks the % error.																																						Values from the error tables that are ranked and displayed					Values from the error tables that are ranked and displayed
																																									n=651
		Table 1 Reflectance Values, Average, Stdev and CoV% by percentile (rows)
			SZA	23.22	26.41	24.48	22.54	27.86	23	27.37	24.11	22.01	22.6	23.4	27.44	26.48	22.59	25.75	21.84	24.18	26.9	21.78	23.64	23.33	21.94	26.17	28.03	25.31	24.23	25.39	22.27	21.76	22.09	23.94								%	Ranked % Error
			Atm-I	890	891	892	893	898	903	904	908	912	916	932	934	937	942	944	945	950	951	954	957	959	962	973	974	982	994	995	996	1009	1018	1062							Step	Cum. Step	CMAC	LaSRC
			SENSOR	L8	L8	L8	L8	L8	L8	L8	L8	L8	L9	L9	L9	L9	L8	L8	L9	L9	L8	L8	L8	L8	L8	L8	L8	L8	L8	L9	L8	L8	L8	L8							1	0.0015361	-0.165244	-0.194656
			TOA	07-09-22	08-02-19	07-19-20	07-01-19	08-10-22	07-06-21	08-07-21	07-17-19	06-23-22	07-01-22	07-10-22	08-11-22	08-02-22	07-02-22	07-28-20	06-15-22	07-17-22	08-04-20	06-13-21	07-12-20	07-10-19	06-20-21	07-31-21	08-11-19	07-26-19	07-18-22	07-26-22	06-26-20	06-16-22	06-24-19	07-15-21	Avg	StDev	CV%				2	0.0030722	-0.162311	-0.178155
			1	869	857	853	911	842	888	873	908	890	936	914	875	921	926	924	1011	923	950	946	942	962	930	950	914	960	988	1026	1029	1087	1072	1077	940.452	65.584	0.0697367				3	0.00460829	-0.154627	-0.168943
			3	952	929	935	978	932	981	932	984	986	1006	1011	965	1006	1023	1024	1088	1006	1043	1030	1043	1033	1014	1026	1000	1025	1083	1098	1100	1158	1140	1151	1022	62.8374	0.0614847				4	0.00614439	-0.139908	-0.167333
			5	1020	984	1000	1044	993	1035	991	1047	1043	1071	1061	1032	1046	1097	1071	1136	1061	1081	1094	1102	1092	1060	1082	1059	1078	1131	1136	1149	1213	1191	1195	1077.26	58.7162	0.0545053				5	0.00768049	-0.132974	-0.155492
			10	1124	1097	1120	1158	1096	1150	1122	1156	1174	1189	1197	1137	1161	1208	1180	1252	1176	1179	1217	1215	1205	1171	1205	1177	1190	1225	1247	1276	1315	1308	1278	1190.48	56.3252	0.0473128				6	0.00921659	-0.131809	-0.150346
			15	1249	1199	1219	1260	1202	1245	1214	1241	1282	1295	1315	1241	1253	1316	1293	1347	1284	1257	1328	1307	1309	1278	1302	1257	1278	1335	1347	1356	1413	1402	1354	1289.61	54.2836	0.042093				7	0.0107527	-0.12442	-0.148081
			20	1353	1274	1303	1343	1300	1341	1301	1319	1375	1386	1412	1351	1337	1423	1377	1439	1373	1334	1426	1399	1405	1353	1394	1339	1365	1426	1427	1443	1495	1476	1414	1377.52	53.5592	0.038881				8	0.0122888	-0.120019	-0.129392
			25	1437	1352	1377	1415	1391	1417	1391	1400	1469	1483	1517	1436	1426	1519	1447	1528	1454	1394	1505	1472	1485	1436	1481	1411	1437	1510	1525	1515	1591	1555	1479	1459.84	56.9714	0.0390258				9	0.0138249	-0.118003	-0.126524
			30	1535	1430	1457	1506	1467	1511	1478	1481	1555	1581	1601	1527	1529	1619	1529	1625	1530	1473	1595	1551	1573	1504	1566	1488	1509	1603	1597	1595	1679	1630	1547	1544.23	59.1014	0.0382725				10	0.015361	-0.1179	-0.122036
			35	1614	1519	1538	1590	1553	1583	1576	1568	1652	1661	1706	1612	1611	1722	1625	1705	1631	1538	1693	1650	1644	1581	1647	1563	1590	1693	1684	1681	1766	1723	1614	1630.1	62.7839	0.0385155				11	0.0168971	-0.113299	-0.117706
			40	1723	1606	1640	1688	1653	1685	1665	1651	1755	1771	1805	1712	1695	1829	1719	1799	1717	1618	1793	1757	1728	1676	1742	1672	1692	1780	1773	1770	1843	1806	1675	1723.81	63.1097	0.0366106				12	0.0184332	-0.108595	-0.116943
			45	1855	1695	1735	1792	1756	1775	1747	1730	1859	1875	1898	1833	1799	1929	1798	1886	1819	1687	1897	1836	1829	1772	1851	1752	1783	1871	1858	1846	1937	1891	1758	1817.71	66.5123	0.0365912				13	0.0199693	-0.107371	-0.116707
			50	1968	1767	1817	1883	1871	1864	1852	1813	1969	1977	2016	1927	1897	2042	1890	1986	1918	1758	2001	1910	1926	1872	1946	1829	1852	1978	1962	1934	2042	1979	1823	1911.9	76.3284	0.0399227				14	0.0215054	-0.107105	-0.113376
			55	2076	1859	1922	1987	1979	1960	1964	1906	2091	2104	2155	2041	1986	2171	1997	2103	2009	1840	2116	2038	2038	1979	2063	1907	1956	2095	2059	2036	2148	2080	1909	2018.52	86.7409	0.0429726				15	0.0230415	-0.106838	-0.112684
			60	2186	1965	2028	2094	2086	2057	2091	2010	2207	2229	2290	2186	2117	2305	2110	2220	2122	1937	2233	2137	2138	2066	2179	2024	2058	2203	2176	2149	2270	2170	1989	2130.06	94.6654	0.0444425				16	0.0245776	-0.105907	-0.108958
			65	2294	2065	2110	2195	2193	2155	2201	2102	2303	2306	2391	2297	2212	2420	2193	2299	2219	2012	2341	2248	2236	2155	2317	2118	2144	2305	2270	2227	2381	2280	2071	2227.74	101.053	0.0453612				17	0.0261137	-0.0993706	-0.10869
			70	2407	2141	2196	2281	2319	2254	2294	2184	2411	2434	2502	2414	2327	2546	2278	2425	2327	2086	2425	2328	2327	2249	2402	2195	2230	2399	2368	2319	2487	2366	2145	2324.71	112.117	0.0482285				18	0.0276498	-0.0983328	-0.107336
			75	2588	2253	2322	2418	2436	2363	2427	2304	2600	2588	2623	2517	2448	2667	2380	2581	2470	2180	2522	2431	2428	2361	2510	2283	2326	2497	2482	2419	2595	2462	2233	2442.39	123.12	0.0504098				19	0.0291859	-0.0952752	-0.107095
			80	2897	2389	2454	2558	2641	2572	2568	2433	2912	2912	2831	2693	2653	2874	2474	2847	2694	2294	2651	2552	2545	2542	2609	2407	2422	2701	2664	2517	2771	2567	2325	2611.9	173.607	0.0664677				20	0.030722	-0.0940367	-0.1047
			85	3435	2651	2728	2870	3120	2931	2905	2651	3414	3433	3347	3145	3101	3393	2708	3353	3174	2516	2910	2753	2712	2853	2922	2620	2621	3126	3018	2736	3260	2732	2550	2957.68	290.48	0.098212				21	0.0322581	-0.088562	-0.103635
			90	4411	3210	3296	3393	3958	3482	3589	3276	4366	4276	4297	4039	3878	4361	3239	4198	3993	3042	3513	3251	3330	3394	3501	3098	3210	3987	3895	3274	4149	3241	2939	3647.94	459.069	0.125843				22	0.0337942	-0.0880989	-0.0974534
			95	5290	4481	4413	4230	4856	4611	4805	4534	5407	5378	5246	4908	4806	5343	4376	5114	4865	3947	4564	4442	4400	4493	4678	4323	4348	4819	4662	4484	5020	4218	3805	4673.1	409.323	0.0875915				23	0.0353303	-0.0879331	-0.0923765
			CMAC	07-09-22	08-02-19	07-19-20	07-01-19	08-10-22	07-06-21	08-07-21	07-17-19	06-23-22	07-01-22	07-10-22	08-11-22	08-02-22	07-02-22	07-28-20	06-15-22	07-17-22	08-04-20	06-13-21	07-12-20	07-10-19	06-20-21	07-31-21	08-11-19	07-26-19	07-18-22	07-26-22	06-26-20	06-16-22	06-24-19	07-15-21	Avg	StDev	CV%				24	0.0368664	-0.0869973	-0.0916591
			1	637	620	616	679	598	638	626	658	637	686	656	605	653	650	649	748	632	663	654	649	674	627	636	602	647	663	711	721	775	741	707	660	43.5293	0.0659534				25	0.0384025	-0.0823869	-0.0903944
			3	723	699	709	758	698	739	691	748	745	762	757	698	742	756	763	828	732	773	757	770	761	727	733	705	724	785	799	806	867	829	800	754	42.5107	0.0563802				26	0.0399386	-0.0821695	-0.0893952
			5	797	761	781	825	765	805	754	819	808	842	811	775	797	845	818	892	802	824	830	835	826	785	802	780	784	840	851	864	928	893	860	819	40.5219	0.0494773				27	0.0414747	-0.0769231	-0.0893952
			10	919	889	915	954	882	936	905	940	956	973	971	899	927	976	944	1022	934	935	978	972	963	917	951	916	925	957	984	1016	1056	1040	967	952	41.9211	0.0440348				28	0.0430108	-0.0761681	-0.0863975
			15	1057	1002	1027	1072	996	1043	1012	1039	1081	1099	1105	1020	1034	1101	1075	1137	1059	1028	1109	1083	1083	1042	1065	1013	1033	1092	1104	1117	1181	1160	1070	1069	45.4767	0.0425414				29	0.0445469	-0.0751971	-0.0856602
			20	1173	1088	1122	1164	1111	1155	1109	1128	1185	1200	1222	1148	1129	1228	1175	1248	1165	1115	1225	1195	1196	1132	1180	1111	1137	1204	1205	1222	1280	1253	1145	1173	48.8922	0.0416814				30	0.0460829	-0.074659	-0.084507
			25	1268	1175	1202	1243	1212	1241	1211	1220	1295	1311	1345	1247	1236	1342	1258	1350	1264	1188	1320	1279	1295	1232	1280	1197	1226	1307	1322	1314	1400	1350	1228	1270	56.4964	0.0444854				31	0.047619	-0.0732392	-0.0793936
			30	1379	1262	1293	1346	1299	1345	1311	1311	1394	1421	1443	1354	1355	1458	1352	1463	1353	1281	1425	1372	1400	1314	1386	1288	1309	1420	1411	1413	1510	1446	1319	1369	62.322	0.0455237				32	0.0491551	-0.0732345	-0.0775536
			35	1467	1363	1384	1439	1397	1427	1420	1410	1502	1514	1562	1452	1450	1579	1466	1558	1470	1356	1541	1489	1484	1407	1481	1380	1410	1531	1522	1515	1618	1563	1405	1470	68.9183	0.0468832				33	0.0506912	-0.0727011	-0.0773968
			40	1589	1456	1496	1550	1510	1543	1521	1503	1621	1641	1677	1568	1548	1704	1575	1667	1570	1453	1659	1616	1582	1519	1596	1514	1533	1637	1630	1625	1713	1664	1487	1580	71.5345	0.045275				34	0.0522273	-0.0710351	-0.0762229
			45	1736	1558	1601	1666	1625	1645	1614	1593	1740	1758	1785	1709	1669	1821	1667	1770	1693	1534	1783	1710	1703	1634	1727	1607	1643	1749	1733	1718	1830	1771	1596	1690	77.1988	0.0456798				35	0.0537634	-0.0692341	-0.0747869
			50	1862	1637	1694	1767	1754	1746	1733	1688	1865	1875	1922	1818	1783	1952	1775	1888	1808	1619	1906	1798	1817	1753	1841	1701	1728	1880	1861	1827	1960	1882	1678	1801	89.9814	0.0499619				36	0.0552995	-0.0658739	-0.0725162
			55	1984	1740	1811	1884	1876	1855	1859	1794	2004	2020	2083	1951	1886	2103	1900	2026	1915	1716	2042	1951	1950	1880	1982	1795	1853	2024	1981	1952	2092	2007	1789	1926	103.12	0.0535411				37	0.0568356	-0.0651996	-0.0720757
			60	2107	1859	1929	2002	1997	1964	2002	1912	2136	2164	2237	2120	2039	2261	2033	2161	2047	1830	2180	2067	2068	1985	2122	1934	1977	2157	2123	2090	2243	2119	1894	2057	113.015	0.0549417				38	0.0583717	-0.0640129	-0.0711662
			65	2231	1969	2022	2116	2116	2075	2127	2016	2249	2252	2353	2249	2151	2396	2131	2257	2164	1919	2308	2199	2185	2090	2288	2049	2082	2281	2240	2188	2383	2260	2000	2172	121.827	0.0560897				39	0.0599078	-0.0630344	-0.0707434
			70	2352	2056	2117	2215	2257	2188	2234	2109	2371	2393	2484	2383	2282	2540	2229	2401	2292	2006	2409	2295	2295	2204	2392	2139	2186	2398	2363	2301	2514	2368	2098	2286	134.124	0.0586717				40	0.0614439	-0.0627445	-0.0690296
			75	2559	2179	2258	2368	2392	2315	2385	2244	2591	2575	2629	2503	2425	2683	2347	2589	2460	2120	2523	2416	2411	2339	2522	2248	2304	2517	2502	2420	2650	2486	2211	2425	145.594	0.0600386				41	0.06298	-0.0607069	-0.0687305
			80	2901	2330	2406	2523	2622	2552	2544	2388	2948	2944	2867	2704	2659	2931	2457	2905	2724	2255	2677	2560	2554	2556	2641	2396	2420	2764	2724	2542	2871	2615	2334	2623	200.107	0.0762894				42	0.0645161	-0.0605417	-0.0686426
			85	3500	2625	2714	2877	3165	2951	2925	2639	3514	3529	3446	3237	3192	3536	2731	3486	3292	2516	2984	2799	2754	2930	3021	2653	2661	3292	3165	2812	3484	2826	2619	3028	330.613	0.109185				43	0.0660522	-0.0596291	-0.0685662
			90	4584	3251	3349	3464	4100	3585	3697	3347	4588	4493	4579	4278	4080	4669	3348	4486	4243	3141	3697	3397	3490	3571	3722	3225	3377	4329	4235	3477	4587	3475	3130	3839	522.762	0.136171				44	0.0675883	-0.059539	-0.0624516
			95	5547	4683	4607	4408	5116	4867	5087	4777	5804	5764	5663	5294	5155	5818	4708	5560	5295	4230	4947	4805	4756	4880	5134	4719	4776	5370	5204	4982	5658	4680	4266	5050	445.624	0.0882424				45	0.0691244	-0.0588327	-0.0623594
			LaSRC_Surface	07-09-22	08-02-19	07-19-20	07-01-19	08-10-22	07-06-21	08-07-21	07-17-19	06-23-22	07-01-22	07-10-22	08-11-22	08-02-22	07-02-22	07-28-20	06-15-22	07-17-22	08-04-20	06-13-21	07-12-20	07-10-19	06-20-21	07-31-21	08-11-19	07-26-19	07-18-22	07-26-22	06-26-20	06-16-22	06-24-19	07-15-21	Avg	StDev	CV%				46	0.0706605	-0.0582552	-0.0609039
			1	592	631	619	675	611	659	589	689	627	694	646	673	685	638	652	761	683	712	658	672	663	654	628	649	662	699	707	743	740	732	805	672.516	49.1887	0.0731412				47	0.0721966	-0.055171	-0.0585038
			3	713	722	729	758	718	752	695	782	747	796	757	775	790	756	781	869	774	821	766	774	754	745	736	741	757	800	834	825	862	835	900	776.258	48.368	0.0623092				48	0.0737327	-0.0544313	-0.0566466
			5	782	777	792	831	780	815	748	845	823	863	834	840	849	842	833	925	845	877	858	858	845	815	818	818	829	876	906	900	944	902	964	846.258	49.1596	0.0580905				49	0.0752688	-0.0533563	-0.0563074
			10	927	922	928	977	902	950	899	975	977	1005	994	955	961	986	965	1068	970	980	1005	990	960	950	938	948	955	1000	1029	1057	1077	1058	1077	980.161	48.801	0.0497888				50	0.0768049	-0.0507937	-0.0560323
			15	1066	1039	1040	1087	1028	1066	1021	1065	1102	1130	1113	1092	1076	1129	1078	1170	1103	1070	1129	1112	1083	1072	1081	1056	1062	1114	1151	1164	1198	1159	1159	1097.26	44.8419	0.0408673				51	0.078341	-0.050467	-0.0545705
			20	1178	1125	1123	1174	1141	1166	1115	1156	1206	1228	1226	1190	1163	1233	1192	1279	1194	1158	1246	1219	1207	1166	1182	1150	1168	1221	1254	1263	1294	1260	1240	1197.32	47.3782	0.0395701				52	0.0798771	-0.0483753	-0.0544584
			25	1278	1208	1213	1266	1235	1263	1216	1242	1319	1343	1359	1302	1267	1343	1285	1372	1282	1233	1330	1315	1309	1250	1292	1233	1261	1328	1364	1352	1400	1367	1315	1294.9	52.8566	0.040819				53	0.0814132	-0.0476317	-0.0539517
			30	1382	1296	1307	1359	1320	1356	1318	1334	1413	1441	1451	1408	1384	1463	1373	1482	1382	1313	1428	1399	1405	1333	1387	1328	1345	1439	1459	1443	1503	1451	1392	1390.13	56.4959	0.0406407				54	0.0829493	-0.0461035	-0.0538863
			35	1478	1398	1400	1462	1420	1453	1425	1431	1531	1541	1571	1504	1485	1585	1482	1572	1489	1393	1550	1514	1497	1430	1483	1419	1446	1547	1551	1550	1617	1546	1476	1491.81	61.2467	0.0410554				55	0.0844854	-0.0455937	-0.0537084
			40	1596	1487	1513	1566	1535	1576	1534	1527	1640	1656	1699	1621	1574	1702	1598	1675	1601	1482	1667	1632	1596	1538	1607	1544	1566	1662	1659	1655	1709	1660	1551	1600.9	64.1687	0.0400828				56	0.0860215	-0.0444444	-0.0533609
			45	1739	1584	1615	1687	1651	1665	1629	1624	1765	1784	1805	1750	1703	1822	1692	1782	1706	1562	1788	1721	1722	1645	1731	1643	1663	1762	1754	1749	1818	1762	1647	1708.71	70.0096	0.0409722				57	0.0875576	-0.0442047	-0.0507822
			50	1872	1662	1704	1789	1782	1760	1747	1709	1897	1898	1955	1859	1804	1956	1796	1896	1819	1641	1918	1818	1832	1758	1848	1727	1760	1891	1884	1847	1950	1871	1731	1818.74	85.1571	0.046822				58	0.0890937	-0.043898	-0.0505753
			55	2000	1781	1822	1910	1906	1875	1881	1817	2034	2030	2101	2000	1915	2096	1915	2025	1932	1738	2039	1961	1950	1882	1976	1820	1864	2029	2002	1967	2067	1995	1821	1940.35	94.6599	0.0487849				59	0.0906298	-0.0438925	-0.0498023
			60	2127	1896	1940	2036	2027	1974	2009	1937	2159	2173	2244	2163	2061	2256	2037	2157	2055	1846	2182	2079	2078	1979	2117	1953	1992	2148	2134	2088	2209	2098	1919	2066.87	105.088	0.0508441				60	0.0921659	-0.0434284	-0.0490765
			65	2249	1999	2033	2139	2145	2092	2135	2035	2266	2268	2376	2299	2170	2392	2139	2256	2173	1932	2303	2203	2187	2083	2262	2059	2096	2277	2242	2186	2339	2222	2021	2179.94	114.565	0.0525543				61	0.093702	-0.0428543	-0.048961
			70	2371	2084	2133	2236	2289	2195	2237	2130	2385	2413	2504	2432	2298	2537	2239	2384	2290	2006	2404	2294	2300	2191	2358	2145	2189	2388	2356	2297	2473	2325	2104	2289.9	129.017	0.0563415				62	0.0952381	-0.0422313	-0.0453297
			75	2584	2214	2281	2388	2420	2335	2398	2261	2604	2585	2641	2552	2440	2682	2363	2566	2450	2119	2519	2391	2413	2313	2480	2259	2306	2506	2487	2406	2601	2435	2205	2425.94	140.236	0.0578068				63	0.0967742	-0.0411021	-0.0445741
			80	2919	2366	2427	2553	2657	2569	2552	2407	2951	2946	2892	2752	2673	2926	2473	2871	2704	2250	2660	2545	2550	2524	2603	2406	2423	2741	2702	2528	2798	2540	2307	2619.84	196.128	0.0748628				64	0.0983103	-0.0408877	-0.04354
			85	3524	2662	2731	2899	3196	2971	2912	2652	3526	3511	3464	3264	3184	3527	2734	3433	3249	2500	2957	2790	2743	2879	2982	2649	2636	3246	3117	2786	3362	2734	2551	3011.97	328.924	0.109206				65	0.0998464	-0.0404683	-0.0431048
			90	4560	3282	3355	3490	4100	3573	3698	3348	4568	4435	4511	4261	4033	4574	3334	4359	4144	3088	3643	3364	3471	3466	3650	3201	3318	4221	4102	3413	4342	3368	3026	3783.81	501.776	0.132611				66	0.101382	-0.0396825	-0.0430159
			95	5482	4655	4587	4386	5052	4803	5040	4710	5653	5588	5565	5207	5006	5637	4572	5336	5091	4081	4788	4657	4673	4665	4931	4588	4617	5147	4958	4784	5302	4471	4016	4904.77	429.971	0.0876637				67	0.102919	-0.0396393	-0.0429882
																																									68	0.104455	-0.0394483	-0.0416629
																																									69	0.105991	-0.0388828	-0.0411005
	Table 2 Estimated correction error treating the percentile averages of the five lowest Atm-I images as the estimate closest to surface reflectance (standard)																								% error = (value-standard)/standard/standard								These data feed to Table 4, this spreadsheet								70	0.107527	-0.0388326	-0.0405485
			SZA	24.48	23.22	22.54	26.41	24.11	23	27.37	27.86	22.6	22.01	27.44	24.18	21.84	26.48	23.4	23.64	25.75	28.03	22.59	26.9	21.94	21.78	23.33	26.17	25.39	24.23	25.31	22.27	21.76	22.09	23.94							71	0.109063	-0.0385295	-0.0403131
			Atm-I	890	891	892	893	898	903	904	908	912	916	932	934	937	942	944	945	950	951	954	957	959	962	973	974	982	994	995	996	1009	1018	1062							72	0.110599	-0.0382979	-0.0378609
			SENSOR	L8	L8	L8	L8	L8	L8	L8	L8	L9	L8	L9	L9	L9	L9	L9	L8	L8	L8	L8	L8	L8	L8	L8	L8	L9	L8	L8	L8	L8	L8	L8							73	0.112135	-0.0376547	-0.0372873
	CMAC	Percentile	Standard	07-19-20	07-09-22	07-01-19	08-02-19	07-17-19	07-06-21	08-07-21	08-10-22	07-01-22	06-23-22	08-11-22	07-17-22	06-15-22	08-02-22	07-10-22	07-12-20	07-28-20	08-11-19	07-02-22	08-04-20	06-20-21	06-13-21	07-10-19	07-31-21	07-26-22	07-18-22	07-26-19	06-26-20	06-16-22	06-24-19	07-15-21							74	0.113671	-0.0374648	-0.0369143
		1	630	0.0111111	-0.015873	-0.0222222	0.0777778	-0.0507937	0.0126984	-0.00634921	0.0444444	0.0111111	0.0888889	0.0412698	-0.0396825	0.0365079	0.031746	0.0301587	0.187302	0.0031746	0.052381	0.0380952	0.0301587	0.0698413	-0.0047619	0.00952381	-0.0444444	0.0269841	0.052381	0.128571	0.144444	0.230159	0.17619	0.122222							75	0.115207	-0.0371815	-0.0367105
		3	717.4	0.00780597	-0.0256482	-0.0117089	0.0565933	-0.0270421	0.0301087	-0.0367996	0.042654	0.0384723	0.0621689	0.0551993	-0.0270421	0.0342905	0.0538054	0.0635629	0.154168	0.0203513	0.0775021	0.0551993	0.0733203	0.060775	0.0133817	0.0217452	-0.0172846	0.00919989	0.0942292	0.113744	0.123502	0.208531	0.155562	0.115138							76	0.116743	-0.0368852	-0.0362967
		5	785.8	0.014253	-0.0315602	-0.00610842	0.0498855	-0.0264698	0.0244337	-0.0404683	0.0422499	0.0282515	0.0715195	0.0320692	-0.013744	0.014253	0.0753372	0.0409773	0.135149	0.0206159	0.0486129	0.0562484	0.0626114	0.0511581	-0.00101807	0.0206159	-0.00738101	-0.00229066	0.0689743	0.0829728	0.0995164	0.180962	0.136421	0.0944261							77	0.11828	-0.0367996	-0.0354602
		10	911.8	0.00789647	-0.0250055	0.00350954	0.0462821	-0.0326826	0.0265409	-0.00745778	0.0309278	0.0484755	0.06712	0.0649265	-0.0140382	0.0166703	0.0704102	0.0353148	0.12086	0.0243474	0.0254442	0.0726036	0.0660233	0.0561527	0.00570301	0.0429919	0.00460627	0.0144769	0.0495723	0.079184	0.114279	0.158149	0.140601	0.0605396							78	0.119816	-0.0357758	-0.0349141
		15	1030.8	0.0254172	-0.0279395	-0.00368646	0.039969	-0.0337602	0.0118355	-0.0182383	0.00795499	0.0487	0.0661622	0.0719829	-0.0104773	0.00310438	0.0681024	0.0428793	0.103027	0.0273574	-0.00271634	0.0758634	0.0506403	0.0506403	0.0108653	0.0331781	-0.0172681	0.00213426	0.0593714	0.0710128	0.0836244	0.145712	0.12534	0.0380287							79	0.121352	-0.034965	-0.0346412
		20	1131.6	0.0365854	-0.0385295	-0.00848356	0.028632	-0.0182043	0.0206787	-0.0199717	-0.00318134	0.0471898	0.0604454	0.0798869	0.0144928	-0.00229763	0.0851891	0.0383528	0.102863	0.0295157	-0.0146695	0.082538	0.0560269	0.0569106	0.000353482	0.0427713	-0.0182043	0.004772	0.0639802	0.0648639	0.0798869	0.131142	0.107282	0.0118416							80	0.122888	-0.0344271	-0.034579
		25	1220	0.0393443	-0.0368852	-0.0147541	0.0188525	-0.00655738	0.0172131	-0.00737705	0	0.0614754	0.0745902	0.102459	0.0221311	0.0131148	0.1	0.0311475	0.106557	0.0360656	-0.0262295	0.0819672	0.0483607	0.0614754	0.00983607	0.0491803	-0.0188525	0.00491803	0.0713115	0.0836066	0.0770492	0.147541	0.106557	0.00655738							81	0.124424	-0.0337602	-0.0344391
		30	1315.8	0.0480316	-0.0408877	-0.0173279	0.0229518	-0.0127679	0.0221918	-0.00364797	-0.00364797	0.0594315	0.0799514	0.0966712	0.0290318	0.0297918	0.108071	0.0275118	0.111871	0.0282718	-0.0264478	0.0829913	0.0427117	0.0639915	-0.00136799	0.0533516	-0.0211278	-0.00516796	0.0791914	0.0723514	0.0738714	0.147591	0.0989512	0.00243198							82	0.12596	-0.0337578	-0.0340392
		35	1410	0.0404255	-0.0333333	-0.0184397	0.0205674	-0.00921986	0.0120567	0.0070922	0	0.0652482	0.0737589	0.107801	0.0297872	0.0283688	0.119858	0.0397163	0.104965	0.0425532	-0.0382979	0.0929078	0.0560284	0.0524823	-0.00212766	0.0503546	-0.0212766	0	0.0858156	0.0794326	0.0744681	0.147518	0.108511	-0.0035461							83	0.127496	-0.0337014	-0.0340116
		40	1520.2	0.0452572	-0.0422313	-0.015919	0.0196027	-0.00670964	0.014998	0.000526247	-0.0113143	0.0663071	0.0794632	0.103144	0.0314432	0.0182871	0.120905	0.0360479	0.0965662	0.0327588	-0.0442047	0.0913038	0.063018	0.0406525	-0.00078937	0.0498619	-0.00407841	0.00841994	0.076832	0.0722273	0.0689383	0.126825	0.0945928	-0.0218392							84	0.129032	-0.0333333	-0.0338677
		45	1637.2	0.0603469	-0.0483753	-0.0221109	0.017591	-0.00745175	0.00476423	-0.0141705	-0.0269973	0.0627901	0.0737845	0.0902761	0.0438554	0.0194234	0.112265	0.0182018	0.0811141	0.0340826	-0.0630344	0.0890545	0.0444662	0.0401906	-0.00195456	0.0548497	-0.0184461	0.00354263	0.0682873	0.0585145	0.0493526	0.117762	0.0817249	-0.0251649							85	0.130568	-0.0333311	-0.0333369
		50	1742.8	0.0683957	-0.0607069	-0.0280009	0.0138857	0.00642644	0.00183613	-0.00562314	-0.0314437	0.0701171	0.0758549	0.102823	0.043149	0.0230663	0.120037	0.018476	0.0833142	0.0374111	-0.0710351	0.0936424	0.0316732	0.0425752	0.00585265	0.0563461	-0.0239844	-0.00849208	0.0787239	0.0678219	0.0483131	0.124627	0.0798715	-0.0371815							86	0.132104	-0.0329061	-0.0329857
		55	1859	0.0672405	-0.0640129	-0.0258203	0.0134481	0.0091447	-0.00215169	0	-0.034965	0.0779989	0.0866057	0.120495	0.049489	0.0145239	0.131253	0.0220549	0.0898332	0.0301237	-0.0769231	0.09844	0.049489	0.048951	0.0112964	0.0661646	-0.0344271	-0.00322754	0.0887574	0.0656267	0.0500269	0.125336	0.0796127	-0.0376547							87	0.133641	-0.0326826	-0.0328074
		60	1978.8	0.0647867	-0.0605417	-0.0251668	0.0117243	0.00919749	-0.00747928	0.0117243	-0.0337578	0.0794421	0.0935921	0.130483	0.0713564	0.0304225	0.142612	0.0273903	0.092076	0.0344653	-0.0751971	0.101678	0.0445725	0.0450778	0.00313321	0.0723671	-0.02264	-0.000909642	0.0900546	0.0728724	0.0561957	0.133515	0.070851	-0.0428543							88	0.135177	-0.0315602	-0.032806
		65	2090.8	0.0670557	-0.0582552	-0.0329061	0.0120528	0.0120528	-0.00755692	0.0173139	-0.0357758	0.0756648	0.0770997	0.125407	0.0756648	0.0287928	0.145973	0.0192271	0.0794911	0.0350105	-0.0821695	0.103884	0.0517505	0.0450545	-0.000382629	0.094318	-0.0199923	-0.00420892	0.09097	0.0713602	0.0464894	0.139755	0.080926	-0.0434284							89	0.136713	-0.0314437	-0.0325155
		70	2199.4	0.0693826	-0.0651996	-0.0374648	0.00709284	0.026189	-0.00518323	0.0157316	-0.0411021	0.0780213	0.088024	0.129399	0.0834773	0.0375557	0.15486	0.0134582	0.0916614	0.0421024	-0.0879331	0.0952987	0.0434664	0.0434664	0.00209148	0.0875693	-0.027462	-0.00609257	0.0902974	0.0743839	0.0461944	0.143039	0.0766573	-0.0461035							90	0.138249	-0.0314437	-0.0313574
		75	2351.2	0.0883804	-0.0732392	-0.0396393	0.00714529	0.0173528	-0.0153964	0.0143756	-0.0455937	0.10199	0.0951854	0.118152	0.0645628	0.0313882	0.141119	-0.00178632	0.10114	0.0462742	-0.0983328	0.0730691	0.0275604	0.0254338	-0.00518884	0.0726438	-0.0438925	-0.0200749	0.0705172	0.0641375	0.0292617	0.127084	0.0573324	-0.0596291							91	0.139785	-0.0280009	-0.0304466
		80	2556.4	0.134799	-0.088562	-0.0588327	-0.0130652	0.0256611	-0.00172117	-0.00485057	-0.0658739	0.153184	0.151619	0.121499	0.0577374	0.0401346	0.146534	-0.0388828	0.136364	0.0655609	-0.1179	0.0471757	0.00140823	-0.00093882	-0.00015647	0.0330934	-0.0627445	-0.0533563	0.0812079	0.0655609	-0.00563292	0.123064	0.0229229	-0.0869973							92	0.141321	-0.0279395	-0.0301092
		85	2976.2	0.175996	-0.118003	-0.0880989	-0.0333311	0.0634366	-0.00846717	-0.0172031	-0.113299	0.1807	0.18574	0.157852	0.0876285	0.0725086	0.188092	-0.0823869	0.171292	0.106108	-0.154627	0.00262079	-0.059539	-0.074659	-0.0155232	0.0150528	-0.108595	-0.105907	0.106108	0.0634366	-0.055171	0.17062	-0.050467	-0.120019							93	0.142857	-0.027462	-0.0300328
		90	3749.6	0.22253	-0.132974	-0.106838	-0.0761681	0.09345	-0.043898	-0.0140282	-0.107371	0.223597	0.198261	0.221197	0.140922	0.0881161	0.245199	-0.107105	0.196394	0.131587	-0.162311	-0.0140282	-0.0940367	-0.0692341	-0.0476317	-0.00736079	-0.139908	-0.0993706	0.154523	0.129454	-0.0727011	0.22333	-0.0732345	-0.165244							94	0.144393	-0.0270421	-0.0299693
		95	4872.2	0.1385	-0.0388326	-0.0544313	-0.0952752	0.050039	-0.00106728	0.0440869	-0.0195394	0.191248	0.183038	0.162309	0.0865728	0.0580436	0.194122	-0.0337014	0.141168	0.086778	-0.131809	0.0153524	-0.0137925	-0.0238496	0.00160092	0.0537334	-0.0314437	-0.0197447	0.102172	0.0681007	0.022536	0.161282	-0.0394483	-0.12442							95	0.145929	-0.0270421	-0.0294677
	LaSRC	Percentile	Standard	07-19-20	07-09-22	07-01-19	08-02-19	07-17-19	07-06-21	08-07-21	08-10-22	07-01-22	06-23-22	08-11-22	07-17-22	06-15-22	08-02-22	07-10-22	07-12-20	07-28-20	08-11-19	07-02-22	08-04-20	06-20-21	06-13-21	07-10-19	07-31-21	07-26-22	07-18-22	07-26-19	06-26-20	06-16-22	06-24-19	07-15-21							96	0.147465	-0.0269973	-0.0289148
		1	625.6	-0.0537084	0.00863171	-0.0105499	0.0789642	-0.0233376	0.0533887	-0.0585038	0.101343	0.00223785	0.109335	0.0326087	0.0757673	0.0949488	0.019821	0.0421995	0.216432	0.0917519	0.138107	0.0517903	0.0741688	0.0597826	0.0453964	0.00383632	0.0374041	0.0581841	0.117327	0.130115	0.18766	0.182864	0.170077	0.286765							97	0.149002	-0.0264698	-0.0285836
		3	728	-0.0206044	-0.00824176	0.00137363	0.0412088	-0.0137363	0.032967	-0.0453297	0.0741758	0.0260989	0.0934066	0.0398352	0.0645604	0.0851648	0.0384615	0.0728022	0.193681	0.0631868	0.127747	0.0521978	0.0631868	0.0357143	0.0233516	0.010989	0.0178571	0.0398352	0.0989011	0.145604	0.133242	0.184066	0.146978	0.236264							98	0.150538	-0.0264478	-0.027611
		5	792.4	-0.0131247	-0.0194346	-0.000504796	0.0487128	-0.0156487	0.0285209	-0.0560323	0.0663806	0.0386169	0.0890964	0.0524987	0.0600707	0.0714286	0.0625946	0.0512367	0.16734	0.0663806	0.106764	0.0827865	0.0827865	0.0663806	0.0285209	0.0323069	0.0323069	0.0461888	0.105502	0.143362	0.13579	0.191318	0.138314	0.216557							99	0.152074	-0.0262295	-0.0270884
		10	931.2	-0.00451031	-0.00987973	-0.00343643	0.0491838	-0.0313574	0.020189	-0.034579	0.0470361	0.0491838	0.0792526	0.0674399	0.0255584	0.0320017	0.0588488	0.0362973	0.146907	0.0416667	0.0524055	0.0792526	0.0631443	0.0309278	0.020189	0.00730241	0.0180412	0.0255584	0.0738832	0.105026	0.135095	0.156572	0.136168	0.156572							100	0.15361	-0.0258203	-0.0269628
		15	1052	0.013308	-0.0123574	-0.0114068	0.03327	-0.0228137	0.013308	-0.0294677	0.0123574	0.0475285	0.0741445	0.0579848	0.0380228	0.0228137	0.0731939	0.0247148	0.112167	0.0484791	0.0171103	0.0731939	0.0570342	0.0294677	0.0190114	0.0275665	0.00380228	0.0095057	0.0589354	0.0941065	0.106464	0.138783	0.101711	0.101711							101	0.155146	-0.0256482	-0.0260323
		20	1148.2	0.0259537	-0.0202055	-0.0219474	0.02247	-0.00627068	0.0155025	-0.0289148	0.00679324	0.0503397	0.0695001	0.0677582	0.0364048	0.0128897	0.0738547	0.0381467	0.113917	0.0398885	0.0085351	0.0851768	0.0616617	0.0512106	0.0155025	0.0294374	0.00156767	0.0172444	0.0634036	0.0921442	0.0999826	0.126981	0.0973698	0.0799512							102	0.156682	-0.0251668	-0.0258065
		25	1240	0.0306452	-0.0258065	-0.0217742	0.0209677	-0.00403226	0.0185484	-0.0193548	0.0016129	0.0637097	0.0830645	0.0959677	0.05	0.0217742	0.0830645	0.0362903	0.106452	0.033871	-0.00564516	0.0725806	0.0604839	0.0556452	0.00806452	0.0419355	-0.00564516	0.0169355	0.0709677	0.1	0.0903226	0.129032	0.102419	0.0604839							103	0.158218	-0.0251649	-0.0255561
		30	1332.8	0.0369148	-0.027611	-0.0193577	0.0196579	-0.00960384	0.017407	-0.0111044	0.00090036	0.0601741	0.0811825	0.0886855	0.0564226	0.0384154	0.0976891	0.0301621	0.111945	0.0369148	-0.0148559	0.0714286	0.0496699	0.0541717	0.00015006	0.0406663	-0.00360144	0.00915366	0.0796819	0.0946879	0.0826831	0.127701	0.0886855	0.0444178							104	0.159754	-0.0250055	-0.025329
		35	1431.6	0.0324113	-0.0234702	-0.0220732	0.021235	-0.00810282	0.0149483	-0.00461023	-0.000419111	0.0694328	0.076418	0.0973736	0.0505728	0.0373009	0.107153	0.0352054	0.0980721	0.040095	-0.0269628	0.0827047	0.057558	0.0456832	-0.00111763	0.0359039	-0.00880134	0.0100587	0.0806091	0.0834032	0.0827047	0.129505	0.0799106	0.0310142							105	0.16129	-0.0239844	-0.0242871
		40	1539.4	0.0367676	-0.0340392	-0.0171495	0.0172795	-0.00285826	0.0237755	-0.00350786	-0.00805509	0.0653501	0.0757438	0.103677	0.0530077	0.0224763	0.105626	0.0380668	0.0880863	0.0400156	-0.0372873	0.0828894	0.0601533	0.0367676	-0.000909445	0.0439132	0.00298818	0.0172795	0.0796414	0.0776926	0.0750942	0.110173	0.0783422	0.0075354							106	0.162826	-0.0238496	-0.0234702
		45	1655.2	0.0506283	-0.0430159	-0.0242871	0.0192122	-0.00253746	0.00592073	-0.0158289	-0.0188497	0.0663364	0.0778154	0.0905027	0.057274	0.0288787	0.100773	0.022233	0.0766071	0.0306912	-0.0563074	0.080232	0.0397535	0.0403577	-0.0061624	0.0457951	-0.00737071	0.00471242	0.0645239	0.0596907	0.0566699	0.0983567	0.0645239	-0.00495408							107	0.164363	-0.02264	-0.023371
		50	1761.8	0.0625497	-0.0566466	-0.0328074	0.0154388	0.0114655	-0.00102168	-0.0084005	-0.0299693	0.0767397	0.0773073	0.109661	0.0551708	0.0239528	0.110228	0.019412	0.0761721	0.0324668	-0.0685662	0.0886593	0.0318992	0.0398456	-0.00215689	0.0489272	-0.0197525	-0.00102168	0.0733341	0.0693609	0.0483596	0.106823	0.0619821	-0.0174821							108	0.165899	-0.0222222	-0.0233376
		55	1883.8	0.0616838	-0.0545705	-0.032806	0.0139081	0.0117847	-0.00467141	-0.00148636	-0.0354602	0.0797325	0.0776091	0.115299	0.0616838	0.0165623	0.112645	0.0165623	0.0749549	0.0255866	-0.0773968	0.0823867	0.040981	0.0351417	-0.000955515	0.0489436	-0.0338677	-0.0105107	0.0770782	0.0627455	0.044166	0.0972502	0.0590296	-0.0333369							109	0.167435	-0.0221109	-0.0228137
		60	2005.2	0.0607421	-0.0544584	-0.0325155	0.0153601	0.0108717	-0.0155595	0.00189507	-0.0340116	0.0767006	0.0836824	0.11909	0.0786954	0.0278276	0.125075	0.0158588	0.0757032	0.0248354	-0.0793936	0.0881708	0.0368043	0.0363056	-0.013066	0.055755	-0.0260323	-0.00658288	0.0712148	0.064233	0.0412926	0.101636	0.0462797	-0.0429882							110	0.168971	-0.0218392	-0.0220732
		65	2113	0.0643635	-0.0539517	-0.0378609	0.0123048	0.0151443	-0.00993848	0.0104117	-0.0369143	0.0724089	0.0733554	0.124468	0.0880265	0.0269759	0.13204	0.0123048	0.0676763	0.0283956	-0.0856602	0.0899195	0.0425935	0.0350213	-0.0141978	0.0705159	-0.0255561	-0.00804543	0.0776148	0.0610506	0.034548	0.106957	0.0515854	-0.04354							111	0.170507	-0.0212766	-0.0219474
		70	2222.6	0.0667686	-0.0623594	-0.0403131	0.00602898	0.0298749	-0.0124179	0.0064789	-0.0416629	0.0730676	0.0856654	0.126608	0.094214	0.0339242	0.141456	0.00737875	0.0726177	0.0303248	-0.0974534	0.0816161	0.0321245	0.0348241	-0.0142176	0.0609196	-0.0349141	-0.0151174	0.0744173	0.0600198	0.0334743	0.112661	0.0460722	-0.0533609							112	0.172043	-0.0211278	-0.0218232
		75	2377.4	0.0869017	-0.0687305	-0.0405485	0.00445865	0.0179187	-0.0178346	0.00866493	-0.048961	0.0953142	0.0873223	0.110877	0.0734416	0.0263313	0.128123	-0.00605704	0.0793304	0.0305376	-0.10869	0.0595609	0.00572054	0.0149743	-0.0270884	0.0431564	-0.0498023	-0.0300328	0.0540927	0.0461008	0.0120299	0.0940523	0.0242281	-0.0725162							113	0.173579	-0.0200749	-0.0217742
		80	2584.4	0.129469	-0.084507	-0.0609039	-0.0121498	0.0280916	-0.00595883	-0.0125368	-0.0686426	0.141851	0.139916	0.119022	0.0648506	0.0342826	0.132178	-0.0431048	0.110896	0.0462777	-0.129392	0.0292524	-0.0152453	-0.0133106	-0.023371	0.00719703	-0.0690296	-0.0624516	0.0605943	0.0455038	-0.0218232	0.0826497	-0.01718	-0.107336							114	0.175115	-0.0199923	-0.0206044
		85	3002.4	0.173728	-0.113376	-0.0903944	-0.0344391	0.0644817	-0.0104583	-0.0301092	-0.116707	0.174394	0.169398	0.153744	0.0871303	0.0604849	0.174727	-0.0893952	0.143419	0.0821343	-0.167333	-0.0151212	-0.0707434	-0.0863975	-0.0411005	-0.00679456	-0.117706	-0.122036	0.0811351	0.0381695	-0.0720757	0.119771	-0.0893952	-0.150346							115	0.176651	-0.0199717	-0.0202055
		90	3757.4	0.213605	-0.126524	-0.107095	-0.0711662	0.0911801	-0.0490765	-0.0158088	-0.108958	0.215734	0.180337	0.200564	0.134029	0.0733486	0.217331	-0.112684	0.160111	0.10289	-0.178155	-0.0304466	-0.1047	-0.0762229	-0.0775536	-0.0285836	-0.148081	-0.116943	0.123383	0.0917124	-0.0916591	0.155586	-0.103635	-0.194656							116	0.178187	-0.0197447	-0.0197525
		95	4832.4	0.134426	-0.0367105	-0.0507822	-0.0923765	0.0454433	-0.00608393	0.04296	-0.025329	0.169812	0.156361	0.151602	0.0775184	0.0359242	0.166501	-0.0538863	0.104213	0.0535138	-0.155492	-0.00918798	-0.0362967	-0.0329857	-0.0346412	0.0204039	-0.0505753	-0.0445741	0.0651022	0.0259912	-0.0100157	0.0971774	-0.0747869	-0.168943							117	0.179724	-0.0195394	-0.0194346
																																									118	0.18126	-0.0188525	-0.0193577
																																									119	0.182796	-0.0184461	-0.0193548
	Table 3		Rochester		Green Band 4			Copied values from the Error Table above converted to absolute values that are then averaged														These data feed to "a -Low refl% Error Distr L8.xlsx"																			120	0.184332	-0.0184397	-0.0188497
																																									121	0.185868	-0.0182383	-0.0178346
			Cum. %	890	891	892	893	898	903	904	908	912	916	932	934	937	942	944	945	950	951	954	957	959	962	973	974	982	994	995	996	1009	1018	1062	<-- Image Atm-I						122	0.187404	-0.0182043	-0.0174821
	CMAC		1	0.0111111	-0.015873	-0.0222222	0.0777778	-0.0507937	0.0126984	-0.00634921	0.0444444	0.0111111	0.0888889	0.0412698	-0.0396825	0.0365079	0.031746	0.0301587	0.187302	0.0031746	0.052381	0.0380952	0.0301587	0.0698413	-0.0047619	0.00952381	-0.0444444	0.0269841	0.052381	0.128571	0.144444	0.230159	0.17619	0.122222							123	0.18894	-0.0182043	-0.01718
			3	0.00780597	-0.0256482	-0.0117089	0.0565933	-0.0270421	0.0301087	-0.0367996	0.042654	0.0384723	0.0621689	0.0551993	-0.0270421	0.0342905	0.0538054	0.0635629	0.154168	0.0203513	0.0775021	0.0551993	0.0733203	0.060775	0.0133817	0.0217452	-0.0172846	0.00919989	0.0942292	0.113744	0.123502	0.208531	0.155562	0.115138							124	0.190476	-0.0173279	-0.0171495
			5	0.014253	-0.0315602	-0.00610842	0.0498855	-0.0264698	0.0244337	-0.0404683	0.0422499	0.0282515	0.0715195	0.0320692	-0.013744	0.014253	0.0753372	0.0409773	0.135149	0.0206159	0.0486129	0.0562484	0.0626114	0.0511581	-0.00101807	0.0206159	-0.00738101	-0.00229066	0.0689743	0.0829728	0.0995164	0.180962	0.136421	0.0944261							125	0.192012	-0.0172846	-0.0158289
			10	0.00789647	-0.0250055	0.00350954	0.0462821	-0.0326826	0.0265409	-0.00745778	0.0309278	0.0484755	0.06712	0.0649265	-0.0140382	0.0166703	0.0704102	0.0353148	0.12086	0.0243474	0.0254442	0.0726036	0.0660233	0.0561527	0.00570301	0.0429919	0.00460627	0.0144769	0.0495723	0.079184	0.114279	0.158149	0.140601	0.0605396							126	0.193548	-0.0172681	-0.0158088
			15	0.0254172	-0.0279395	-0.00368646	0.039969	-0.0337602	0.0118355	-0.0182383	0.00795499	0.0487	0.0661622	0.0719829	-0.0104773	0.00310438	0.0681024	0.0428793	0.103027	0.0273574	-0.00271634	0.0758634	0.0506403	0.0506403	0.0108653	0.0331781	-0.0172681	0.00213426	0.0593714	0.0710128	0.0836244	0.145712	0.12534	0.0380287							127	0.195084	-0.0172031	-0.0156487
			20	0.0365854	-0.0385295	-0.00848356	0.028632	-0.0182043	0.0206787	-0.0199717	-0.00318134	0.0471898	0.0604454	0.0798869	0.0144928	-0.00229763	0.0851891	0.0383528	0.102863	0.0295157	-0.0146695	0.082538	0.0560269	0.0569106	0.000353482	0.0427713	-0.0182043	0.004772	0.0639802	0.0648639	0.0798869	0.131142	0.107282	0.0118416							128	0.196621	-0.015919	-0.0155595
			Avg Abs.Value of Error --->	0.0171782	0.027426	0.00928653	0.0498566	0.0314921	0.0210493	0.0215475	0.0285688	0.0370334	0.0693841	0.0575558	0.0199128	0.017854	0.0640984	0.0418743	0.133895	0.0208937	0.0368877	0.0634247	0.0564635	0.0575796	0.00601391	0.028471	0.0181981	0.0099763	0.0647514	0.0900582	0.107542	0.175776	0.140233	0.0736994							129	0.198157	-0.015873	-0.0152453
																																									130	0.199693	-0.0155232	-0.0151212
																																									131	0.201229	-0.0153964	-0.0151174
				890	891	892	893	898	903	904	908	912	916	932	934	937	942	944	945	950	951	954	957	959	962	973	974	982	994	995	996	1009	1018	1062	<-- Image Atm-I						132	0.202765	-0.0147541	-0.0148559
	LaSRC		1	-0.0537084	0.00863171	-0.0105499	0.0789642	-0.0233376	0.0533887	-0.0585038	0.101343	0.00223785	0.109335	0.0326087	0.0757673	0.0949488	0.019821	0.0421995	0.216432	0.0917519	0.138107	0.0517903	0.0741688	0.0597826	0.0453964	0.00383632	0.0374041	0.0581841	0.117327	0.130115	0.18766	0.182864	0.170077	0.286765							133	0.204301	-0.0146695	-0.0142176
			3	-0.0206044	-0.00824176	0.00137363	0.0412088	-0.0137363	0.032967	-0.0453297	0.0741758	0.0260989	0.0934066	0.0398352	0.0645604	0.0851648	0.0384615	0.0728022	0.193681	0.0631868	0.127747	0.0521978	0.0631868	0.0357143	0.0233516	0.010989	0.0178571	0.0398352	0.0989011	0.145604	0.133242	0.184066	0.146978	0.236264							134	0.205837	-0.0141705	-0.0141978
			5	-0.0131247	-0.0194346	-0.000504796	0.0487128	-0.0156487	0.0285209	-0.0560323	0.0663806	0.0386169	0.0890964	0.0524987	0.0600707	0.0714286	0.0625946	0.0512367	0.16734	0.0663806	0.106764	0.0827865	0.0827865	0.0663806	0.0285209	0.0323069	0.0323069	0.0461888	0.105502	0.143362	0.13579	0.191318	0.138314	0.216557							135	0.207373	-0.0140382	-0.0137363
			10	-0.00451031	-0.00987973	-0.00343643	0.0491838	-0.0313574	0.020189	-0.034579	0.0470361	0.0491838	0.0792526	0.0674399	0.0255584	0.0320017	0.0588488	0.0362973	0.146907	0.0416667	0.0524055	0.0792526	0.0631443	0.0309278	0.020189	0.00730241	0.0180412	0.0255584	0.0738832	0.105026	0.135095	0.156572	0.136168	0.156572							136	0.208909	-0.0140282	-0.0133106
			15	0.013308	-0.0123574	-0.0114068	0.03327	-0.0228137	0.013308	-0.0294677	0.0123574	0.0475285	0.0741445	0.0579848	0.0380228	0.0228137	0.0731939	0.0247148	0.112167	0.0484791	0.0171103	0.0731939	0.0570342	0.0294677	0.0190114	0.0275665	0.00380228	0.0095057	0.0589354	0.0941065	0.106464	0.138783	0.101711	0.101711							137	0.210445	-0.0140282	-0.0131247
			20	0.0259537	-0.0202055	-0.0219474	0.02247	-0.00627068	0.0155025	-0.0289148	0.00679324	0.0503397	0.0695001	0.0677582	0.0364048	0.0128897	0.0738547	0.0381467	0.113917	0.0398885	0.0085351	0.0851768	0.0616617	0.0512106	0.0155025	0.0294374	0.00156767	0.0172444	0.0634036	0.0921442	0.0999826	0.126981	0.0973698	0.0799512							138	0.211982	-0.0137925	-0.013066
			Avg Abs.Value of Error --->	0.0218682	0.0131251	0.00820316	0.0456349	0.0188607	0.0273127	0.0421379	0.0513476	0.0356676	0.0857892	0.0530209	0.0500641	0.0532079	0.0544624	0.0442329	0.158408	0.0585589	0.0751116	0.070733	0.0669971	0.0455806	0.0253287	0.0185731	0.0184966	0.0327528	0.0863255	0.118393	0.133039	0.163431	0.13177	0.179637							139	0.213518	-0.013744	-0.0125368
																																									140	0.215054	-0.0130652	-0.0124179
																																									141	0.21659	-0.0127679	-0.0123574
																																									142	0.218126	-0.0117089	-0.0121498
																																									143	0.219662	-0.0113143	-0.0114068
																																									144	0.221198	-0.0104773	-0.0111044
																																									145	0.222734	-0.00921986	-0.0105499
																																									146	0.22427	-0.00849208	-0.0105107
																																									147	0.225806	-0.00848356	-0.0104583
																																									148	0.227343	-0.00846717	-0.0100157
																																									149	0.228879	-0.00755692	-0.00993848
																																									150	0.230415	-0.00747928	-0.00987973
																																									151	0.231951	-0.00745778	-0.00960384
																																									152	0.233487	-0.00745175	-0.00918798
																																									153	0.235023	-0.00738101	-0.00880134
																																									154	0.236559	-0.00737705	-0.0084005
																																									155	0.238095	-0.00736079	-0.00824176
																																									156	0.239631	-0.00670964	-0.00810282
																																									157	0.241167	-0.00655738	-0.00805509
																																									158	0.242704	-0.00634921	-0.00804543
																																									159	0.24424	-0.00610842	-0.00737071
																																									160	0.245776	-0.00609257	-0.00679456
																																									161	0.247312	-0.00563292	-0.00658288
																																									162	0.248848	-0.00562314	-0.00627068
																																									163	0.250384	-0.00518884	-0.0061624
																																									164	0.25192	-0.00518323	-0.00608393
																																									165	0.253456	-0.00516796	-0.00605704
																																									166	0.254992	-0.00485057	-0.00595883
																																									167	0.256528	-0.0047619	-0.00564516
																																									168	0.258065	-0.00420892	-0.00564516
																																									169	0.259601	-0.00407841	-0.00495408
																																									170	0.261137	-0.00368646	-0.00467141
																																									171	0.262673	-0.00364797	-0.00461023
																																									172	0.264209	-0.00364797	-0.00451031
																																									173	0.265745	-0.0035461	-0.00403226
																																									174	0.267281	-0.00322754	-0.00360144
																																									175	0.268817	-0.00318134	-0.00350786
																																									176	0.270353	-0.00271634	-0.00343643
																																									177	0.271889	-0.00229763	-0.00285826
																																									178	0.273425	-0.00229066	-0.00253746
																																									179	0.274962	-0.00215169	-0.00215689
																																									180	0.276498	-0.00212766	-0.00148636
																																									181	0.278034	-0.00195456	-0.00111763
																																									182	0.27957	-0.00178632	-0.00102168
																																									183	0.281106	-0.00172117	-0.00102168
																																									184	0.282642	-0.00136799	-0.000955515
																																									185	0.284178	-0.00106728	-0.000909445
																																									186	0.285714	-0.00101807	-0.000504796
																																									187	0.28725	-0.00093882	-0.000419111
																																									188	0.288786	-0.000909642	0.00015006
																																									189	0.290323	-0.00078937	0.00090036
																																									190	0.291859	-0.000382629	0.00137363
																																									191	0.293395	-0.00015647	0.00156767
																																									192	0.294931	0	0.0016129
																																									193	0.296467	0	0.00189507
																																									194	0.298003	0	0.00223785
																																									195	0.299539	0	0.00298818
																																									196	0.301075	0.000353482	0.00380228
																																									197	0.302611	0.000526247	0.00383632
																																									198	0.304147	0.00140823	0.00445865
																																									199	0.305684	0.00160092	0.00471242
																																									200	0.30722	0.00183613	0.00572054
																																									201	0.308756	0.00209148	0.00592073
																																									202	0.310292	0.00213426	0.00602898
																																									203	0.311828	0.00243198	0.0064789
																																									204	0.313364	0.00262079	0.00679324
																																									205	0.3149	0.00310438	0.00719703
																																									206	0.316436	0.00313321	0.00730241
																																									207	0.317972	0.0031746	0.00737875
																																									208	0.319508	0.00350954	0.0075354
																																									209	0.321045	0.00354263	0.00806452
																																									210	0.322581	0.00460627	0.0085351
																																									211	0.324117	0.00476423	0.00863171
																																									212	0.325653	0.004772	0.00866493
																																									213	0.327189	0.00491803	0.00915366
																																									214	0.328725	0.00570301	0.0095057
																																									215	0.330261	0.00585265	0.0100587
																																									216	0.331797	0.00642644	0.0104117
																																									217	0.333333	0.00655738	0.0108717
																																									218	0.334869	0.0070922	0.010989
																																									219	0.336406	0.00709284	0.0114655
																																									220	0.337942	0.00714529	0.0117847
																																									221	0.339478	0.00780597	0.0120299
																																									222	0.341014	0.00789647	0.0123048
																																									223	0.34255	0.00795499	0.0123048
																																									224	0.344086	0.00841994	0.0123574
																																									225	0.345622	0.0091447	0.0128897
																																									226	0.347158	0.00919749	0.013308
																																									227	0.348694	0.00919989	0.013308
																																									228	0.35023	0.00952381	0.0139081
																																									229	0.351767	0.00983607	0.0149483
																																									230	0.353303	0.0108653	0.0149743
																																									231	0.354839	0.0111111	0.0151443
																																									232	0.356375	0.0111111	0.0153601
																																									233	0.357911	0.0112964	0.0154388
																																									234	0.359447	0.0117243	0.0155025
																																									235	0.360983	0.0117243	0.0155025
																																									236	0.362519	0.0118355	0.0158588
																																									237	0.364055	0.0118416	0.0165623
																																									238	0.365591	0.0120528	0.0165623
																																									239	0.367127	0.0120528	0.0169355
																																									240	0.368664	0.0120567	0.0171103
																																									241	0.3702	0.0126984	0.0172444
																																									242	0.371736	0.0131148	0.0172795
																																									243	0.373272	0.0133817	0.0172795
																																									244	0.374808	0.0134481	0.017407
																																									245	0.376344	0.0134582	0.0178571
																																									246	0.37788	0.0138857	0.0179187
																																									247	0.379416	0.014253	0.0180412
																																									248	0.380952	0.014253	0.0185484
																																									249	0.382488	0.0143756	0.0190114
																																									250	0.384025	0.0144769	0.0192122
																																									251	0.385561	0.0144928	0.019412
																																									252	0.387097	0.0145239	0.0196579
																																									253	0.388633	0.014998	0.019821
																																									254	0.390169	0.0150528	0.020189
																																									255	0.391705	0.0153524	0.020189
																																									256	0.393241	0.0157316	0.0204039
																																									257	0.394777	0.0166703	0.0209677
																																									258	0.396313	0.0172131	0.021235
																																									259	0.397849	0.0173139	0.0217742
																																									260	0.399386	0.0173528	0.022233
																																									261	0.400922	0.017591	0.02247
																																									262	0.402458	0.0182018	0.0224763
																																									263	0.403994	0.0182871	0.0228137
																																									264	0.40553	0.018476	0.0233516
																																									265	0.407066	0.0188525	0.0237755
																																									266	0.408602	0.0192271	0.0239528
																																									267	0.410138	0.0194234	0.0242281
																																									268	0.411674	0.0196027	0.0247148
																																									269	0.41321	0.0203513	0.0248354
																																									270	0.414747	0.0205674	0.0255584
																																									271	0.416283	0.0206159	0.0255584
																																									272	0.417819	0.0206159	0.0255866
																																									273	0.419355	0.0206787	0.0259537
																																									274	0.420891	0.0217452	0.0259912
																																									275	0.422427	0.0220549	0.0260989
																																									276	0.423963	0.0221311	0.0263313
																																									277	0.425499	0.0221918	0.0269759
																																									278	0.427035	0.022536	0.0275665
																																									279	0.428571	0.0229229	0.0278276
																																									280	0.430108	0.0229518	0.0280916
																																									281	0.431644	0.0230663	0.0283956
																																									282	0.43318	0.0243474	0.0285209
																																									283	0.434716	0.0244337	0.0285209
																																									284	0.436252	0.0254172	0.0288787
																																									285	0.437788	0.0254338	0.0292524
																																									286	0.439324	0.0254442	0.0294374
																																									287	0.44086	0.0256611	0.0294677
																																									288	0.442396	0.026189	0.0298749
																																									289	0.443932	0.0265409	0.0301621
																																									290	0.445469	0.0269841	0.0303248
																																									291	0.447005	0.0273574	0.0305376
																																									292	0.448541	0.0273903	0.0306452
																																									293	0.450077	0.0275118	0.0306912
																																									294	0.451613	0.0275604	0.0309278
																																									295	0.453149	0.0282515	0.0310142
																																									296	0.454685	0.0282718	0.0318992
																																									297	0.456221	0.0283688	0.0320017
																																									298	0.457757	0.028632	0.0321245
																																									299	0.459293	0.0287928	0.0323069
																																									300	0.460829	0.0290318	0.0323069
																																									301	0.462366	0.0292617	0.0324113
																																									302	0.463902	0.0295157	0.0324668
																																									303	0.465438	0.0297872	0.0326087
																																									304	0.466974	0.0297918	0.032967
																																									305	0.46851	0.0301087	0.03327
																																									306	0.470046	0.0301237	0.0334743
																																									307	0.471582	0.0301587	0.033871
																																									308	0.473118	0.0301587	0.0339242
																																									309	0.474654	0.0304225	0.0342826
																																									310	0.47619	0.0309278	0.034548
																																									311	0.477727	0.0311475	0.0348241
																																									312	0.479263	0.0313882	0.0350213
																																									313	0.480799	0.0314432	0.0351417
																																									314	0.482335	0.0316732	0.0352054
																																									315	0.483871	0.031746	0.0357143
																																									316	0.485407	0.0320692	0.0359039
																																									317	0.486943	0.0327588	0.0359242
																																									318	0.488479	0.0330934	0.0362903
																																									319	0.490015	0.0331781	0.0362973
																																									320	0.491551	0.0340826	0.0363056
																																									321	0.493088	0.0342905	0.0364048
																																									322	0.494624	0.0344653	0.0367676
																																									323	0.49616	0.0350105	0.0367676
																																									324	0.497696	0.0353148	0.0368043
																																									325	0.499232	0.0360479	0.0369148
																																									326	0.500768	0.0360656	0.0369148
																																									327	0.502304	0.0365079	0.0373009
																																									328	0.50384	0.0365854	0.0374041
																																									329	0.505376	0.0374111	0.0380228
																																									330	0.506912	0.0375557	0.0380668
																																									331	0.508449	0.0380287	0.0381467
																																									332	0.509985	0.0380952	0.0381695
																																									333	0.511521	0.0383528	0.0384154
																																									334	0.513057	0.0384723	0.0384615
																																									335	0.514593	0.0393443	0.0386169
																																									336	0.516129	0.0397163	0.0397535
																																									337	0.517665	0.039969	0.0398352
																																									338	0.519201	0.0401346	0.0398352
																																									339	0.520737	0.0401906	0.0398456
																																									340	0.522273	0.0404255	0.0398885
																																									341	0.52381	0.0406525	0.0400156
																																									342	0.525346	0.0409773	0.040095
																																									343	0.526882	0.0412698	0.0403577
																																									344	0.528418	0.0421024	0.0406663
																																									345	0.529954	0.0422499	0.040981
																																									346	0.53149	0.0425532	0.0412088
																																									347	0.533026	0.0425752	0.0412926
																																									348	0.534562	0.042654	0.0416667
																																									349	0.536098	0.0427117	0.0419355
																																									350	0.537634	0.0427713	0.0421995
																																									351	0.539171	0.0428793	0.0425935
																																									352	0.540707	0.0429919	0.04296
																																									353	0.542243	0.043149	0.0431564
																																									354	0.543779	0.0434664	0.0439132
																																									355	0.545315	0.0434664	0.044166
																																									356	0.546851	0.0438554	0.0444178
																																									357	0.548387	0.0440869	0.0453964
																																									358	0.549923	0.0444444	0.0454433
																																									359	0.551459	0.0444662	0.0455038
																																									360	0.552995	0.0445725	0.0456832
																																									361	0.554531	0.0450545	0.0457951
																																									362	0.556068	0.0450778	0.0460722
																																									363	0.557604	0.0452572	0.0461008
																																									364	0.55914	0.0461944	0.0461888
																																									365	0.560676	0.0462742	0.0462777
																																									366	0.562212	0.0462821	0.0462797
																																									367	0.563748	0.0464894	0.0470361
																																									368	0.565284	0.0471757	0.0475285
																																									369	0.56682	0.0471898	0.0483596
																																									370	0.568356	0.0480316	0.0484791
																																									371	0.569892	0.0483131	0.0487128
																																									372	0.571429	0.0483607	0.0489272
																																									373	0.572965	0.0484755	0.0489436
																																									374	0.574501	0.0486129	0.0491838
																																									375	0.576037	0.0487	0.0491838
																																									376	0.577573	0.048951	0.0496699
																																									377	0.579109	0.0491803	0.05
																																									378	0.580645	0.0493526	0.0503397
																																									379	0.582181	0.049489	0.0505728
																																									380	0.583717	0.049489	0.0506283
																																									381	0.585253	0.0495723	0.0512106
																																									382	0.58679	0.0498619	0.0512367
																																									383	0.588326	0.0498855	0.0515854
																																									384	0.589862	0.0500269	0.0517903
																																									385	0.591398	0.050039	0.0521978
																																									386	0.592934	0.0503546	0.0524055
																																									387	0.59447	0.0506403	0.0524987
																																									388	0.596006	0.0506403	0.0530077
																																									389	0.597542	0.0511581	0.0533887
																																									390	0.599078	0.0517505	0.0535138
																																									391	0.600614	0.052381	0.0540927
																																									392	0.602151	0.052381	0.0541717
																																									393	0.603687	0.0524823	0.0551708
																																									394	0.605223	0.0533516	0.0556452
																																									395	0.606759	0.0537334	0.055755
																																									396	0.608295	0.0538054	0.0564226
																																									397	0.609831	0.0548497	0.0566699
																																									398	0.611367	0.0551993	0.0570342
																																									399	0.612903	0.0551993	0.057274
																																									400	0.614439	0.0560269	0.057558
																																									401	0.615975	0.0560284	0.0579848
																																									402	0.617512	0.0561527	0.0581841
																																									403	0.619048	0.0561957	0.0588488
																																									404	0.620584	0.0562484	0.0589354
																																									405	0.62212	0.0563461	0.0590296
																																									406	0.623656	0.0565933	0.0595609
																																									407	0.625192	0.0569106	0.0596907
																																									408	0.626728	0.0573324	0.0597826
																																									409	0.628264	0.0577374	0.0600198
																																									410	0.6298	0.0580436	0.0600707
																																									411	0.631336	0.0585145	0.0601533
																																									412	0.632873	0.0593714	0.0601741
																																									413	0.634409	0.0594315	0.0604839
																																									414	0.635945	0.0603469	0.0604839
																																									415	0.637481	0.0604454	0.0604849
																																									416	0.639017	0.0605396	0.0605943
																																									417	0.640553	0.060775	0.0607421
																																									418	0.642089	0.0614754	0.0609196
																																									419	0.643625	0.0614754	0.0610506
																																									420	0.645161	0.0621689	0.0616617
																																									421	0.646697	0.0626114	0.0616838
																																									422	0.648233	0.0627901	0.0616838
																																									423	0.64977	0.063018	0.0619821
																																									424	0.651306	0.0634366	0.0625497
																																									425	0.652842	0.0634366	0.0625946
																																									426	0.654378	0.0635629	0.0627455
																																									427	0.655914	0.0639802	0.0631443
																																									428	0.65745	0.0639915	0.0631868
																																									429	0.658986	0.0641375	0.0631868
																																									430	0.660522	0.0645628	0.0634036
																																									431	0.662058	0.0647867	0.0637097
																																									432	0.663594	0.0648639	0.064233
																																									433	0.665131	0.0649265	0.0643635
																																									434	0.666667	0.0652482	0.0644817
																																									435	0.668203	0.0655609	0.0645239
																																									436	0.669739	0.0655609	0.0645239
																																									437	0.671275	0.0656267	0.0645604
																																									438	0.672811	0.0660233	0.0648506
																																									439	0.674347	0.0661622	0.0651022
																																									440	0.675883	0.0661646	0.0653501
																																									441	0.677419	0.0663071	0.0663364
																																									442	0.678955	0.0670557	0.0663806
																																									443	0.680492	0.06712	0.0663806
																																									444	0.682028	0.0672405	0.0663806
																																									445	0.683564	0.0678219	0.0667686
																																									446	0.6851	0.0681007	0.0674399
																																									447	0.686636	0.0681024	0.0676763
																																									448	0.688172	0.0682873	0.0677582
																																									449	0.689708	0.0683957	0.0693609
																																									450	0.691244	0.0689383	0.0694328
																																									451	0.69278	0.0689743	0.0695001
																																									452	0.694316	0.0693826	0.0705159
																																									453	0.695853	0.0698413	0.0709677
																																									454	0.697389	0.0701171	0.0712148
																																									455	0.698925	0.0704102	0.0714286
																																									456	0.700461	0.0705172	0.0714286
																																									457	0.701997	0.070851	0.0724089
																																									458	0.703533	0.0710128	0.0725806
																																									459	0.705069	0.0713115	0.0726177
																																									460	0.706605	0.0713564	0.0728022
																																									461	0.708141	0.0713602	0.0730676
																																									462	0.709677	0.0715195	0.0731939
																																									463	0.711214	0.0719829	0.0731939
																																									464	0.71275	0.0722273	0.0733341
																																									465	0.714286	0.0723514	0.0733486
																																									466	0.715822	0.0723671	0.0733554
																																									467	0.717358	0.0725086	0.0734416
																																									468	0.718894	0.0726036	0.0738547
																																									469	0.72043	0.0726438	0.0738832
																																									470	0.721966	0.0728724	0.0741445
																																									471	0.723502	0.0730691	0.0741688
																																									472	0.725038	0.0733203	0.0741758
																																									473	0.726575	0.0737589	0.0744173
																																									474	0.728111	0.0737845	0.0749549
																																									475	0.729647	0.0738714	0.0750942
																																									476	0.731183	0.0743839	0.0757032
																																									477	0.732719	0.0744681	0.0757438
																																									478	0.734255	0.0745902	0.0757673
																																									479	0.735791	0.0753372	0.0761721
																																									480	0.737327	0.0756648	0.076418
																																									481	0.738863	0.0756648	0.0766071
																																									482	0.740399	0.0758549	0.0767006
																																									483	0.741935	0.0758634	0.0767397
																																									484	0.743472	0.0766573	0.0770782
																																									485	0.745008	0.076832	0.0773073
																																									486	0.746544	0.0770492	0.0775184
																																									487	0.74808	0.0770997	0.0776091
																																									488	0.749616	0.0775021	0.0776148
																																									489	0.751152	0.0777778	0.0776926
																																									490	0.752688	0.0779989	0.0778154
																																									491	0.754224	0.0780213	0.0783422
																																									492	0.75576	0.0787239	0.0786954
																																									493	0.757296	0.079184	0.0789642
																																									494	0.758833	0.0791914	0.0792526
																																									495	0.760369	0.0794326	0.0792526
																																									496	0.761905	0.0794421	0.0793304
																																									497	0.763441	0.0794632	0.0796414
																																									498	0.764977	0.0794911	0.0796819
																																									499	0.766513	0.0796127	0.0797325
																																									500	0.768049	0.0798715	0.0799106
																																									501	0.769585	0.0798869	0.0799512
																																									502	0.771121	0.0798869	0.080232
																																									503	0.772657	0.0799514	0.0806091
																																									504	0.774194	0.080926	0.0811351
																																									505	0.77573	0.0811141	0.0811825
																																									506	0.777266	0.0812079	0.0816161
																																									507	0.778802	0.0817249	0.0821343
																																									508	0.780338	0.0819672	0.0823867
																																									509	0.781874	0.082538	0.0826497
																																									510	0.78341	0.0829728	0.0826831
																																									511	0.784946	0.0829913	0.0827047
																																									512	0.786482	0.0833142	0.0827047
																																									513	0.788018	0.0834773	0.0827865
																																									514	0.789555	0.0836066	0.0827865
																																									515	0.791091	0.0836244	0.0828894
																																									516	0.792627	0.0851891	0.0830645
																																									517	0.794163	0.0858156	0.0830645
																																									518	0.795699	0.0865728	0.0834032
																																									519	0.797235	0.0866057	0.0836824
																																									520	0.798771	0.086778	0.0851648
																																									521	0.800307	0.0875693	0.0851768
																																									522	0.801843	0.0876285	0.0856654
																																									523	0.803379	0.088024	0.0869017
																																									524	0.804916	0.0881161	0.0871303
																																									525	0.806452	0.0883804	0.0873223
																																									526	0.807988	0.0887574	0.0880265
																																									527	0.809524	0.0888889	0.0880863
																																									528	0.81106	0.0890545	0.0881708
																																									529	0.812596	0.0898332	0.0886593
																																									530	0.814132	0.0900546	0.0886855
																																									531	0.815668	0.0902761	0.0886855
																																									532	0.817204	0.0902974	0.0890964
																																									533	0.81874	0.09097	0.0899195
																																									534	0.820276	0.0913038	0.0903226
																																									535	0.821813	0.0916614	0.0905027
																																									536	0.823349	0.092076	0.0911801
																																									537	0.824885	0.0929078	0.0917124
																																									538	0.826421	0.09345	0.0917519
																																									539	0.827957	0.0935921	0.0921442
																																									540	0.829493	0.0936424	0.0934066
																																									541	0.831029	0.0942292	0.0940523
																																									542	0.832565	0.094318	0.0941065
																																									543	0.834101	0.0944261	0.094214
																																									544	0.835637	0.0945928	0.0946879
																																									545	0.837174	0.0951854	0.0949488
																																									546	0.83871	0.0952987	0.0953142
																																									547	0.840246	0.0965662	0.0959677
																																									548	0.841782	0.0966712	0.0971774
																																									549	0.843318	0.09844	0.0972502
																																									550	0.844854	0.0989512	0.0973698
																																									551	0.84639	0.0995164	0.0973736
																																									552	0.847926	0.1	0.0976891
																																									553	0.849462	0.10114	0.0980721
																																									554	0.850998	0.101678	0.0983567
																																									555	0.852535	0.10199	0.0989011
																																									556	0.854071	0.102172	0.0999826
																																									557	0.855607	0.102459	0.1
																																									558	0.857143	0.102823	0.100773
																																									559	0.858679	0.102863	0.101343
																																									560	0.860215	0.103027	0.101636
																																									561	0.861751	0.103144	0.101711
																																									562	0.863287	0.103884	0.101711
																																									563	0.864823	0.104965	0.102419
																																									564	0.866359	0.106108	0.10289
																																									565	0.867896	0.106108	0.103677
																																									566	0.869432	0.106557	0.104213
																																									567	0.870968	0.106557	0.105026
																																									568	0.872504	0.107282	0.105502
																																									569	0.87404	0.107801	0.105626
																																									570	0.875576	0.108071	0.106452
																																									571	0.877112	0.108511	0.106464
																																									572	0.878648	0.111871	0.106764
																																									573	0.880184	0.112265	0.106823
																																									574	0.88172	0.113744	0.106957
																																									575	0.883257	0.114279	0.107153
																																									576	0.884793	0.115138	0.109335
																																									577	0.886329	0.117762	0.109661
																																									578	0.887865	0.118152	0.110173
																																									579	0.889401	0.119858	0.110228
																																									580	0.890937	0.120037	0.110877
																																									581	0.892473	0.120495	0.110896
																																									582	0.894009	0.12086	0.111945
																																									583	0.895545	0.120905	0.112167
																																									584	0.897081	0.121499	0.112645
																																									585	0.898618	0.122222	0.112661
																																									586	0.900154	0.123064	0.113917
																																									587	0.90169	0.123502	0.115299
																																									588	0.903226	0.124627	0.117327
																																									589	0.904762	0.125336	0.119022
																																									590	0.906298	0.12534	0.11909
																																									591	0.907834	0.125407	0.119771
																																									592	0.90937	0.126825	0.123383
																																									593	0.910906	0.127084	0.124468
																																									594	0.912442	0.128571	0.125075
																																									595	0.913978	0.129399	0.126608
																																									596	0.915515	0.129454	0.126981
																																									597	0.917051	0.130483	0.127701
																																									598	0.918587	0.131142	0.127747
																																									599	0.920123	0.131253	0.128123
																																									600	0.921659	0.131587	0.129032
																																									601	0.923195	0.133515	0.129469
																																									602	0.924731	0.134799	0.129505
																																									603	0.926267	0.135149	0.130115
																																									604	0.927803	0.136364	0.13204
																																									605	0.929339	0.136421	0.132178
																																									606	0.930876	0.1385	0.133242
																																									607	0.932412	0.139755	0.134029
																																									608	0.933948	0.140601	0.134426
																																									609	0.935484	0.140922	0.135095
																																									610	0.93702	0.141119	0.13579
																																									611	0.938556	0.141168	0.136168
																																									612	0.940092	0.142612	0.138107
																																									613	0.941628	0.143039	0.138314
																																									614	0.943164	0.144444	0.138783
																																									615	0.9447	0.145712	0.139916
																																									616	0.946237	0.145973	0.141456
																																									617	0.947773	0.146534	0.141851
																																									618	0.949309	0.147518	0.143362
																																									619	0.950845	0.147541	0.143419
																																									620	0.952381	0.147591	0.145604
																																									621	0.953917	0.151619	0.146907
																																									622	0.955453	0.153184	0.146978
																																									623	0.956989	0.154168	0.151602
																																									624	0.958525	0.154523	0.153744
																																									625	0.960061	0.15486	0.155586
																																									626	0.961598	0.155562	0.156361
																																									627	0.963134	0.157852	0.156572
																																									628	0.96467	0.158149	0.156572
																																									629	0.966206	0.161282	0.160111
																																									630	0.967742	0.162309	0.166501
																																									631	0.969278	0.17062	0.16734
																																									632	0.970814	0.171292	0.169398
																																									633	0.97235	0.175996	0.169812
																																									634	0.973886	0.17619	0.170077
																																									635	0.975422	0.1807	0.173728
																																									636	0.976959	0.180962	0.174394
																																									637	0.978495	0.183038	0.174727
																																									638	0.980031	0.18574	0.180337
																																									639	0.981567	0.187302	0.182864
																																									640	0.983103	0.188092	0.184066
																																									641	0.984639	0.191248	0.18766
																																									642	0.986175	0.194122	0.191318
																																									643	0.987711	0.196394	0.193681
																																									644	0.989247	0.198261	0.200564
																																									645	0.990783	0.208531	0.213605
																																									646	0.99232	0.221197	0.215734
																																									647	0.993856	0.22253	0.216432
																																									648	0.995392	0.22333	0.216557
																																									649	0.996928	0.223597	0.217331
																																									650	0.998464	0.230159	0.236264
																																									651	1	0.245199	0.286765

## Sheet: B5
B5
			There are four tables in this spreadsheet. The three stacked below examine (1) statistics of precision, (2) assessment and error, and (3) preparation of data for examination of error for low reflectance data. The last table (scroll to the right) ranks the % error.																																						Values from the error tables that are ranked and displayed
																																									n=651
		Table 1 Reflectance Values, Average, Stdev and CoV%
			SZA	23.22	26.41	24.48	22.54	27.86	23	27.37	24.11	22.01	22.6	23.4	27.44	26.48	22.59	25.75	21.84	24.18	26.9	21.78	23.64	23.33	21.94	26.17	28.03	25.31	24.23	25.39	22.27	21.76	22.09	23.94								%	Ranked % Error
			Atm-I	890	891	892	893	898	903	904	908	912	916	932	934	937	942	944	945	950	951	954	957	959	962	973	974	982	994	995	996	1009	1018	1062							Step	Cum. Step	CMAC	LaSRC
			SENSOR	L8	L8	L8	L8	L8	L8	L8	L8	L8	L9	L9	L9	L9	L8	L8	L9	L9	L8	L8	L8	L8	L8	L8	L8	L8	L8	L9	L8	L8	L8	L8							1	0.0015361	-0.158828	-0.1683
			TOA	07-09-22	08-02-19	07-19-20	07-01-19	08-10-22	07-06-21	08-07-21	07-17-19	06-23-22	07-01-22	07-10-22	08-11-22	08-02-22	07-02-22	07-28-20	06-15-22	07-17-22	08-04-20	06-13-21	07-12-20	07-10-19	06-20-21	07-31-21	08-11-19	07-26-19	07-18-22	07-26-22	06-26-20	06-16-22	06-24-19	07-15-21	Avg	StDev	CV%				2	0.0030722	-0.132505	-0.142022
			1	1392	1283	1307	1315	1292	1359	1298	1306	1456	1472	1374	1280	1432	1420	1343	1548	1459	1352	1409	1280	1334	1414	1363	1262	1280	1432	1421	1371	1483	1421	1456	1374.65	74.0853	0.0538942				3	0.00460829	-0.120021	-0.123608
			3	1585	1448	1486	1547	1506	1569	1505	1521	1637	1622	1624	1495	1571	1614	1547	1666	1612	1537	1560	1559	1568	1556	1574	1487	1532	1648	1645	1619	1691	1659	1644	1575.29	61.5728	0.0390867				4	0.00614439	-0.118884	-0.122735
			5	1663	1547	1580	1643	1595	1658	1601	1620	1692	1696	1719	1629	1656	1731	1661	1754	1674	1624	1709	1701	1684	1659	1685	1617	1662	1753	1755	1759	1830	1763	1720	1678.71	62.6616	0.0373273				5	0.00768049	-0.118569	-0.119813
			10	1765	1685	1727	1769	1719	1774	1734	1747	1811	1824	1866	1793	1780	1894	1811	1876	1800	1738	1880	1869	1849	1793	1876	1773	1803	1877	1885	1921	1954	1916	1877	1818.9	68.1089	0.037445				6	0.00921659	-0.11723	-0.118936
			15	1856	1767	1809	1862	1801	1852	1822	1825	1904	1907	1966	1884	1867	1982	1902	1946	1869	1810	1969	1964	1936	1863	1967	1856	1899	1968	1955	2013	2034	2016	1954	1904.03	70.4805	0.0370164				7	0.0107527	-0.111892	-0.114287
			20	1914	1831	1865	1927	1867	1914	1889	1886	1977	1966	2045	1961	1943	2054	1987	2009	1937	1871	2045	2029	2023	1922	2042	1918	1974	2046	2032	2081	2111	2077	2009	1972.65	74.3073	0.0376688				8	0.0122888	-0.110612	-0.113331
			25	1985	1890	1925	1983	1936	1972	1950	1944	2043	2032	2112	2029	1997	2132	2053	2073	1996	1916	2122	2101	2092	1986	2112	1983	2032	2108	2102	2139	2173	2150	2069	2036.68	77.9176	0.0382572				9	0.0138249	-0.11044	-0.111419
			30	2050	1947	1987	2047	1999	2032	2020	1998	2102	2099	2186	2094	2048	2197	2109	2136	2049	1973	2186	2155	2150	2038	2172	2047	2092	2177	2168	2207	2232	2205	2122	2097.55	79.2346	0.0377749				10	0.015361	-0.110376	-0.111202
			35	2115	2004	2045	2102	2055	2091	2072	2057	2168	2169	2253	2164	2112	2264	2175	2192	2113	2028	2250	2218	2210	2099	2236	2114	2142	2246	2232	2265	2291	2260	2171	2158.48	80.9563	0.0375061				11	0.0168971	-0.104911	-0.109293
			40	2178	2054	2101	2162	2113	2146	2128	2113	2229	2236	2319	2226	2170	2341	2229	2256	2181	2075	2313	2278	2264	2148	2296	2169	2204	2313	2292	2319	2358	2317	2231	2218.03	84.6119	0.0381473				12	0.0184332	-0.102885	-0.108073
			45	2249	2104	2162	2215	2182	2192	2193	2164	2298	2300	2395	2301	2233	2410	2288	2311	2237	2113	2371	2340	2328	2206	2368	2221	2267	2378	2348	2371	2416	2378	2278	2277.97	88.3668	0.038792				13	0.0199693	-0.0995037	-0.106085
			50	2310	2158	2208	2272	2257	2239	2254	2216	2363	2366	2469	2364	2298	2483	2332	2370	2307	2162	2430	2394	2383	2268	2428	2263	2311	2436	2404	2419	2475	2429	2322	2335.16	90.9517	0.0389488				14	0.0215054	-0.095013	-0.103054
			55	2390	2206	2253	2331	2324	2294	2309	2261	2439	2432	2536	2433	2362	2549	2380	2435	2367	2205	2493	2446	2426	2318	2479	2307	2354	2499	2465	2466	2545	2477	2367	2391.87	95.7047	0.0400125				15	0.0230415	-0.0863787	-0.0996675
			60	2478	2259	2308	2384	2411	2361	2372	2311	2509	2522	2600	2519	2454	2628	2427	2527	2455	2254	2543	2495	2475	2386	2537	2358	2406	2565	2534	2509	2602	2530	2416	2455.97	99.3041	0.0404338				16	0.0245776	-0.086343	-0.0986782
			65	2587	2330	2395	2455	2504	2451	2453	2381	2611	2631	2682	2596	2524	2707	2497	2633	2546	2317	2618	2557	2544	2465	2613	2425	2469	2632	2608	2579	2672	2587	2473	2533.61	102.426	0.0404268				17	0.0261137	-0.0853226	-0.0977965
			70	2748	2401	2470	2539	2627	2563	2553	2461	2800	2798	2811	2692	2659	2832	2564	2782	2699	2386	2698	2615	2615	2571	2696	2490	2533	2744	2705	2637	2811	2657	2541	2635.42	124.827	0.0473652				18	0.0276498	-0.0851794	-0.0908825
			75	3014	2513	2606	2676	2842	2730	2702	2580	3112	3026	3007	2871	2866	3048	2659	3036	2912	2509	2810	2721	2697	2720	2812	2576	2623	2911	2896	2735	2983	2731	2637	2792.29	170.739	0.0611466				19	0.0291859	-0.084645	-0.0885447
			80	3415	2705	2842	2904	3105	2983	2972	2777	3437	3468	3339	3161	3181	3356	2806	3342	3222	2680	3008	2900	2825	2964	3029	2731	2747	3212	3178	2922	3289	2871	2839	3039.03	238.931	0.0786206				20	0.030722	-0.0845464	-0.0863247
			85	4015	3093	3206	3316	3654	3470	3415	3060	4047	4058	3885	3658	3699	3922	3158	3896	3771	2988	3357	3220	3131	3436	3440	3020	3039	3718	3646	3234	3762	3138	3206	3472.84	340.387	0.098014				21	0.0322581	-0.0832434	-0.0852974
			90	4952	3729	3808	3954	4590	4049	4157	3749	5021	5036	4860	4556	4565	4949	3726	4821	4711	3517	4006	3824	3820	4024	4181	3656	3737	4636	4520	3827	4753	3817	3691	4233.61	494.042	0.116695				22	0.0337942	-0.0818229	-0.0844128
			95	5973	5157	4958	4867	5529	5247	5426	5131	6199	6088	5858	5528	5543	5950	4957	5888	5596	4762	5166	5109	5039	5199	5340	5029	5109	5512	5390	5200	5646	4890	4680	5353.74	403.403	0.0753497				23	0.0353303	-0.0814075	-0.0840627
			CMAC	07-09-22	08-02-19	07-19-20	07-01-19	08-10-22	07-06-21	08-07-21	07-17-19	06-23-22	07-01-22	07-10-22	08-11-22	08-02-22	07-02-22	07-28-20	06-15-22	07-17-22	08-04-20	06-13-21	07-12-20	07-10-19	06-20-21	07-31-21	08-11-19	07-26-19	07-18-22	07-26-22	06-26-20	06-16-22	06-24-19	07-15-21	Avg	StDev	CV%				24	0.0368664	-0.0791775	-0.0822618
			1	1286	1165	1194	1201	1174	1241	1178	1185	1341	1359	1246	1136	1294	1289	1193	1422	1321	1205	1267	1123	1188	1264	1206	1100	1114	1265	1262	1203	1326	1247	1259	1234	75.2223	0.0609581				25	0.0384025	-0.0787048	-0.0819304
			3	1483	1336	1381	1442	1394	1460	1392	1410	1525	1510	1512	1365	1453	1494	1426	1551	1486	1403	1432	1427	1439	1423	1439	1344	1384	1507	1503	1478	1553	1518	1474	1449.81	58.7925	0.040552				26	0.0399386	-0.0765385	-0.0815313
			5	1565	1443	1477	1542	1490	1554	1493	1514	1586	1591	1610	1512	1543	1619	1545	1640	1556	1500	1592	1579	1561	1535	1560	1483	1530	1625	1627	1638	1708	1634	1565	1561.84	58.8383	0.0376724				27	0.0414747	-0.076472	-0.0808265
			10	1671	1586	1630	1673	1618	1676	1636	1648	1714	1728	1767	1688	1675	1794	1705	1775	1692	1624	1777	1763	1743	1679	1768	1655	1686	1765	1772	1816	1847	1806	1749	1713.74	66.1866	0.0386211				28	0.0430108	-0.0762008	-0.0789159
			15	1765	1673	1717	1772	1708	1759	1726	1729	1811	1815	1875	1786	1767	1891	1805	1851	1768	1701	1875	1868	1837	1757	1869	1746	1792	1867	1852	1916	1941	1916	1836	1806.16	70.7084	0.0391484				29	0.0445469	-0.0747508	-0.0786349
			20	1826	1739	1775	1838	1774	1824	1796	1794	1888	1878	1961	1869	1849	1968	1896	1918	1840	1767	1957	1940	1933	1822	1951	1815	1876	1953	1938	1991	2025	1986	1902	1880.29	76.3052	0.0405816				30	0.0460829	-0.073859	-0.0762603
			25	1901	1800	1838	1899	1848	1885	1861	1855	1958	1947	2031	1942	1908	2053	1967	1989	1905	1817	2041	2018	2008	1891	2029	1886	1940	2023	2016	2058	2095	2069	1972	1950	81.5316	0.0418111				31	0.047619	-0.0692508	-0.075979
			30	1968	1861	1903	1965	1913	1948	1935	1912	2021	2019	2111	2011	1962	2123	2028	2056	1963	1879	2111	2077	2071	1948	2095	1958	2006	2100	2090	2134	2162	2131	2032	2015.9	84.1492	0.0417427				32	0.0491551	-0.0690234	-0.0731238
			35	2037	1921	1963	2023	1973	2010	1991	1975	2092	2093	2182	2087	2031	2195	2099	2117	2031	1939	2181	2146	2137	2015	2166	2031	2061	2177	2162	2198	2228	2193	2090	2082.06	86.9202	0.0417471				33	0.0506912	-0.0672757	-0.0669199
			40	2102	1973	2022	2085	2034	2068	2050	2033	2156	2164	2253	2154	2094	2279	2157	2187	2105	1990	2249	2211	2196	2069	2232	2092	2130	2252	2229	2260	2303	2258	2160	2146.68	92.0237	0.042868				34	0.0522273	-0.0658242	-0.0629033
			45	2177	2025	2085	2141	2106	2117	2118	2087	2230	2232	2333	2235	2161	2353	2221	2246	2166	2031	2313	2279	2266	2133	2312	2149	2200	2325	2291	2317	2370	2329	2215	2211.71	97.1649	0.043932				35	0.0537634	-0.0657459	-0.0627004
			50	2240	2081	2134	2201	2185	2167	2183	2143	2299	2302	2413	2301	2232	2432	2268	2310	2242	2085	2376	2338	2326	2201	2378	2196	2249	2389	2354	2371	2436	2385	2266	2273.65	100.354	0.0441379				36	0.0552995	-0.0645238	-0.0622443
			55	2325	2131	2181	2263	2256	2226	2241	2190	2379	2372	2487	2377	2300	2505	2321	2380	2307	2131	2445	2394	2373	2255	2434	2244	2297	2461	2422	2424	2513	2439	2319	2335.23	106.237	0.0454933				37	0.0568356	-0.0640706	-0.0622151
			60	2417	2186	2238	2318	2347	2294	2308	2243	2453	2468	2555	2470	2399	2588	2373	2481	2404	2185	2500	2448	2426	2330	2498	2300	2354	2533	2499	2472	2580	2502	2377	2404.71	110.509	0.0459551				38	0.0583717	-0.0626329	-0.0594391
			65	2530	2262	2329	2393	2446	2389	2391	2318	2563	2584	2645	2553	2475	2674	2447	2596	2502	2254	2581	2516	2501	2417	2583	2375	2423	2608	2583	2552	2657	2564	2442	2488.81	113.785	0.0457188				39	0.0599078	-0.0606634	-0.0587967
			70	2702	2336	2409	2480	2576	2509	2499	2401	2760	2761	2784	2655	2623	2809	2519	2758	2668	2328	2669	2580	2580	2533	2675	2447	2495	2734	2692	2616	2816	2646	2523	2599.45	137.096	0.0527405				40	0.0614439	-0.058762	-0.0587355
			75	2979	2453	2551	2622	2802	2684	2656	2527	3095	3002	2994	2848	2841	3038	2626	3029	2900	2462	2793	2696	2670	2699	2803	2542	2596	2921	2902	2725	3011	2732	2637	2768.9	183.528	0.0662819				41	0.06298	-0.0576923	-0.05862
			80	3403	2656	2797	2864	3083	2952	2940	2735	3443	3476	3354	3156	3180	3381	2781	3366	3230	2650	3006	2891	2810	2966	3041	2710	2734	3259	3219	2934	3354	2888	2871	3036.45	256.206	0.0843767				42	0.0645161	-0.0575819	-0.0584454
			85	4025	3064	3181	3299	3653	3467	3411	3036	4092	4104	3949	3692	3743	3989	3164	3970	3836	2988	3388	3242	3147	3484	3495	3031	3059	3825	3754	3288	3897	3190	3301	3508.52	362.442	0.103304				43	0.0660522	-0.0564784	-0.0546187
			90	5006	3728	3810	3966	4645	4079	4197	3763	5117	5125	4976	4660	4676	5098	3764	4967	4857	3559	4095	3896	3898	4131	4313	3735	3829	4847	4723	3938	5012	3958	3870	4330.26	525.191	0.121284				44	0.0675883	-0.0552591	-0.0527417
			95	6071	5230	5019	4918	5623	5350	5540	5234	6367	6252	6052	5707	5735	6183	5116	6128	5818	4925	5362	5304	5223	5415	5598	5253	5370	5820	5707	5489	6026	5178	5028	5549.71	413.92	0.0745841				45	0.0691244	-0.0543478	-0.0525137
			LaSRC_Surface	07-09-22	08-02-19	07-19-20	07-01-19	08-10-22	07-06-21	08-07-21	07-17-19	06-23-22	07-01-22	07-10-22	08-11-22	08-02-22	07-02-22	07-28-20	06-15-22	07-17-22	08-04-20	06-13-21	07-12-20	07-10-19	06-20-21	07-31-21	08-11-19	07-26-19	07-18-22	07-26-22	06-26-20	06-16-22	06-24-19	07-15-21	Avg	StDev	CV%				46	0.0706605	-0.0519878	-0.0523756
			1	1286	1136	1197	1176	1168	1250	1147	1194	1340	1365	1225	1183	1300	1287	1164	1441	1318	1233	1283	1160	1223	1290	1233	1144	1159	1296	1304	1229	1335	1280	1335	1247.77	76.1878	0.061059				47	0.0721966	-0.0508681	-0.0521745
			3	1485	1350	1384	1427	1402	1452	1378	1420	1532	1521	1527	1420	1474	1505	1441	1561	1504	1437	1447	1445	1459	1449	1450	1385	1431	1533	1543	1505	1569	1520	1537	1467.52	58.4716	0.0398439				48	0.0737327	-0.0505969	-0.051079
			5	1567	1455	1488	1534	1497	1560	1493	1526	1596	1592	1626	1565	1558	1617	1566	1659	1569	1523	1606	1587	1587	1555	1576	1522	1545	1634	1652	1657	1712	1637	1622	1576.87	57.9412	0.0367444				49	0.0752688	-0.0504954	-0.0474593
			10	1675	1600	1636	1684	1634	1686	1636	1657	1716	1733	1784	1737	1688	1801	1722	1784	1707	1647	1791	1780	1755	1689	1793	1684	1712	1784	1794	1830	1863	1807	1788	1728.94	67.1967	0.0388659				50	0.0768049	-0.0500608	-0.0471632
			15	1765	1684	1719	1774	1714	1765	1727	1738	1815	1818	1892	1825	1784	1903	1817	1856	1781	1721	1890	1881	1854	1763	1885	1775	1811	1881	1880	1928	1945	1911	1870	1818.45	71.6928	0.0394252				51	0.078341	-0.0486313	-0.047138
			20	1830	1753	1779	1842	1782	1834	1800	1801	1889	1886	1967	1909	1859	1976	1915	1918	1848	1785	1967	1952	1942	1829	1961	1845	1893	1966	1961	1999	2025	1984	1934	1891.32	75.6286	0.0399872				52	0.0798771	-0.04769	-0.0464075
			25	1898	1814	1840	1903	1854	1889	1863	1860	1958	1953	2043	1983	1917	2056	1980	1988	1908	1830	2045	2028	2014	1893	2031	1909	1958	2030	2034	2068	2092	2059	1999	1957.97	80.7005	0.0412164				53	0.0814132	-0.045407	-0.0445007
			30	1969	1871	1906	1966	1920	1951	1934	1917	2019	2020	2122	2047	1970	2130	2038	2056	1968	1895	2114	2085	2076	1952	2102	1974	2017	2108	2105	2134	2158	2124	2050	2022.52	83.1388	0.0411066				54	0.0829493	-0.0449119	-0.0438998
			35	2039	1934	1967	2028	1981	2013	1996	1978	2085	2098	2193	2118	2036	2199	2113	2112	2030	1946	2182	2157	2139	2013	2171	2048	2072	2176	2172	2201	2224	2182	2107	2087.42	85.5577	0.0409873				55	0.0844854	-0.0449086	-0.0430021
			40	2102	1981	2023	2090	2039	2068	2053	2038	2158	2161	2260	2190	2095	2286	2167	2178	2101	1995	2251	2217	2198	2065	2235	2110	2143	2249	2234	2254	2291	2247	2170	2149.97	90.3609	0.042029				56	0.0860215	-0.0449086	-0.0422815
			45	2174	2038	2083	2141	2102	2121	2116	2088	2224	2228	2340	2266	2162	2350	2227	2236	2164	2037	2313	2284	2266	2123	2313	2159	2206	2321	2293	2312	2354	2310	2225	2212.13	95.0431	0.0429645				57	0.0875576	-0.0422134	-0.0420807
			50	2235	2088	2131	2199	2184	2167	2181	2142	2291	2294	2414	2329	2227	2426	2275	2296	2234	2085	2373	2341	2326	2182	2369	2203	2254	2383	2352	2357	2413	2363	2269	2270.42	97.6206	0.0429967				58	0.0890937	-0.0416328	-0.0409158
			55	2319	2132	2176	2255	2257	2224	2237	2189	2370	2367	2489	2407	2297	2497	2328	2366	2298	2130	2438	2390	2370	2240	2426	2248	2299	2447	2418	2411	2486	2413	2318	2330.39	103.355	0.0443508				59	0.0906298	-0.0402177	-0.0407513
			60	2410	2190	2236	2316	2340	2291	2300	2241	2442	2456	2558	2495	2387	2584	2377	2458	2386	2181	2492	2438	2420	2310	2488	2303	2352	2512	2487	2454	2553	2470	2367	2396.58	107.053	0.0446689				60	0.0921659	-0.0401756	-0.0403012
			65	2522	2263	2327	2391	2442	2381	2387	2313	2551	2572	2644	2576	2465	2665	2448	2572	2482	2247	2570	2505	2489	2388	2561	2377	2422	2585	2568	2530	2625	2529	2426	2478.16	109.715	0.0442729				61	0.093702	-0.0398304	-0.0401988
			70	2695	2338	2401	2472	2566	2502	2494	2395	2742	2744	2776	2678	2601	2797	2518	2726	2646	2312	2654	2576	2568	2501	2651	2443	2489	2707	2673	2591	2769	2603	2496	2584.65	132.279	0.0511786				62	0.0952381	-0.0388267	-0.0398493
			75	2964	2454	2547	2611	2789	2677	2643	2516	3038	2976	2985	2864	2816	3026	2621	2986	2864	2445	2763	2681	2658	2658	2777	2533	2586	2886	2875	2693	2956	2686	2599	2747.52	176.183	0.0641244				63	0.0967742	-0.0383728	-0.038856
			80	3379	2654	2793	2852	3061	2937	2915	2723	3400	3429	3337	3166	3140	3350	2775	3301	3185	2620	2982	2863	2794	2913	3009	2700	2716	3201	3165	2893	3276	2829	2811	3005.45	246.712	0.082088				64	0.0983103	-0.0366312	-0.0382358
			85	4002	3048	3162	3278	3620	3429	3388	3012	4029	4040	3914	3681	3668	3935	3143	3865	3745	2936	3347	3209	3111	3398	3443	3002	3015	3720	3661	3222	3779	3119	3193	3455.29	350.475	0.101432				65	0.0998464	-0.0361491	-0.0380179
			90	4947	3710	3775	3921	4568	4016	4129	3718	4994	5002	4878	4599	4562	4980	3732	4793	4705	3480	4013	3840	3831	3998	4194	3667	3753	4679	4540	3854	4773	3823	3706	4231.61	497.092	0.117471				66	0.101382	-0.0359787	-0.0374439
			95	5929	5122	4938	4840	5499	5229	5436	5107	6157	6044	5875	5585	5516	5967	4978	5856	5592	4746	5184	5140	5061	5177	5360	5072	5138	5557	5438	5225	5683	4956	4707	5358.52	394.171	0.0735597				67	0.102919	-0.0359253	-0.0367669
																																									68	0.104455	-0.0343579	-0.0366338
																																									69	0.105991	-0.0326285	-0.0352738
	Table 2 Estimated correction error treating the percentile averages of the five lowest Atm-I images as the estimate closest to surface reflectance (standard)																								% error = (value-standard)/standard/standard								These data feed to Table 4, this spreadsheet								70	0.107527	-0.032392	-0.0334978
			SZA	24.48	23.22	22.54	26.41	24.11	23	27.37	27.86	22.6	22.01	27.44	24.18	21.84	26.48	23.4	23.64	25.75	28.03	22.59	26.9	21.94	21.78	23.33	26.17	25.39	24.23	25.31	22.27	21.76	22.09	23.94							71	0.109063	-0.0321437	-0.0330233
			Atm-I	890	891	892	893	898	903	904	908	912	916	932	934	937	942	944	945	950	951	954	957	959	962	973	974	982	994	995	996	1009	1018	1062							72	0.110599	-0.031849	-0.0325477
			SENSOR	L8	L8	L8	L8	L8	L8	L8	L8	L9	L8	L9	L9	L9	L9	L9	L8	L8	L8	L8	L8	L8	L8	L8	L8	L9	L8	L8	L8	L8	L8	L8							73	0.112135	-0.0317378	-0.0324988
	CMAC	Percentile	Standard	07-19-20	07-09-22	07-01-19	08-02-19	07-17-19	07-06-21	08-07-21	08-10-22	07-01-22	06-23-22	08-11-22	07-17-22	06-15-22	08-02-22	07-10-22	07-12-20	07-28-20	08-11-19	07-02-22	08-04-20	06-20-21	06-13-21	07-10-19	07-31-21	07-26-22	07-18-22	07-26-19	06-26-20	06-16-22	06-24-19	07-15-21							74	0.113671	-0.0314611	-0.0322423
		1	1204	0.0681063	-0.032392	-0.00830565	-0.00249169	-0.0249169	0.0307309	-0.0215947	-0.0157807	0.113787	0.128738	0.0348837	-0.0564784	0.0747508	0.070598	-0.00913621	0.181063	0.0971761	0.000830565	0.0523256	-0.0672757	-0.013289	0.0498339	0.00166113	-0.0863787	-0.0747508	0.0506645	0.0481728	-0.000830565	0.101329	0.0357143	0.0456811							75	0.115207	-0.0312681	-0.0318125
		3	1407.2	0.0538658	-0.0505969	-0.0186185	0.02473	-0.00938033	0.0375213	-0.0108016	0.00198977	0.0837123	0.0730529	0.0744741	-0.0299886	0.0325469	0.0616828	0.0133599	0.102189	0.0559977	-0.00298465	0.0176236	0.0140705	0.0225981	0.011228	0.0225981	-0.0449119	-0.0164866	0.070921	0.0680785	0.0503127	0.10361	0.0787379	0.0474702							76	0.116743	-0.0309365	-0.03012
		5	1503.4	0.0409738	-0.0401756	-0.0175602	0.0256751	-0.00891313	0.033657	-0.00691765	0.00705069	0.0549421	0.0582679	0.0709059	0.00572037	0.0263403	0.0768924	0.0276706	0.0908607	0.0349874	-0.00226154	0.0589331	0.050286	0.0383132	0.021019	0.037648	-0.0135692	0.0176932	0.0808833	0.0822136	0.0895304	0.136092	0.0868698	0.0409738							77	0.11828	-0.0307991	-0.0287672
		10	1635.6	0.0216434	-0.0303253	-0.00342382	0.0228662	-0.0107606	0.0247004	0.000244559	0.00758132	0.0479335	0.056493	0.0803375	0.0320372	0.024089	0.0968452	0.0424309	0.0852287	0.0344828	-0.0070922	0.0864515	0.0778919	0.065664	0.0265346	0.0809489	0.0118611	0.0308144	0.0791147	0.0833945	0.110296	0.129249	0.104182	0.0693324							78	0.119816	-0.0303253	-0.0287583
		15	1727	0.0220035	-0.0312681	-0.00579039	0.0260567	-0.0110017	0.0185292	-0.000579039	0.00115808	0.0486393	0.0509554	0.0856977	0.0341633	0.0231616	0.0949624	0.045165	0.0718008	0.0237406	-0.015055	0.0856977	0.0816445	0.0636943	0.0173712	0.0822235	0.0110017	0.0376375	0.0810654	0.0723798	0.109438	0.123914	0.109438	0.0631152							79	0.121352	-0.0302641	-0.0281737
		20	1790.4	0.0198838	-0.0287087	-0.00860143	0.0265862	-0.00915996	0.0187668	0.00312779	0.00201072	0.054513	0.0489276	0.095286	0.0439008	0.0327301	0.0991957	0.0589812	0.071269	0.0277033	-0.0130697	0.0930518	0.0835567	0.079647	0.0176497	0.0897006	0.0137399	0.0478105	0.0908177	0.0824397	0.112042	0.131032	0.109249	0.0623324							80	0.122888	-0.0299886	-0.028043
		25	1857.2	0.0235839	-0.0307991	-0.0103381	0.022507	-0.00495369	0.0149688	0.00204609	-0.00118458	0.0542753	0.0483524	0.0935817	0.0456601	0.027353	0.105428	0.0591213	0.070967	0.0257377	-0.0216455	0.0989662	0.086582	0.0811975	0.0181994	0.0925048	0.0155072	0.0445832	0.0892742	0.0855051	0.10812	0.128042	0.114043	0.0618135							81	0.124424	-0.0287087	-0.0278284
		30	1922	0.0239334	-0.0317378	-0.00988554	0.0223725	-0.00468262	0.0135276	0.00676379	-0.00520291	0.0515088	0.0504683	0.0983351	0.0463059	0.0208117	0.104579	0.0551509	0.069719	0.0213319	-0.0223725	0.0983351	0.0806452	0.0775234	0.0135276	0.0900104	0.0187305	0.0437045	0.0926119	0.0874089	0.110302	0.12487	0.108741	0.057232							82	0.12596	-0.0277726	-0.0276842
		35	1983.4	0.0270243	-0.0314611	-0.0102854	0.0199657	-0.00524352	0.0134113	0.0038318	-0.00423515	0.0547545	0.0552586	0.100131	0.0522335	0.0239992	0.106685	0.0582838	0.0673591	0.0239992	-0.0223858	0.0996269	0.0819804	0.0774428	0.0159322	0.0920641	0.0239992	0.0391247	0.0976102	0.0900474	0.108198	0.123324	0.105677	0.0537461							83	0.127496	-0.0274639	-0.0273352
		40	2043.2	0.0287784	-0.0343579	-0.0103759	0.0204581	-0.00450274	0.0121378	0.00332811	-0.00499217	0.0552075	0.0591229	0.102682	0.0542287	0.024863	0.115407	0.0556969	0.0703798	0.0302467	-0.0260376	0.100724	0.0821261	0.0747847	0.0126273	0.0924041	0.0238841	0.0424824	0.102193	0.0909358	0.106108	0.127153	0.105129	0.0571652							84	0.129032	-0.0264696	-0.0272713
		45	2106.8	0.0333207	-0.0388267	-0.0103474	0.0162331	-0.000379723	0.00484147	0.00531612	-0.00939814	0.0584773	0.0594266	0.107367	0.0608506	0.0257262	0.11686	0.0542054	0.0660718	0.0280995	-0.0359787	0.0978736	0.0817353	0.0755648	0.0124359	0.0973989	0.0200304	0.0442377	0.103569	0.0874312	0.0997722	0.124929	0.105468	0.0513575							85	0.130568	-0.0263378	-0.0272643
		50	2168.2	0.033115	-0.0402177	-0.0157735	0.0151278	0.00774836	-0.000553454	0.00682594	-0.0116225	0.0603265	0.0617102	0.112905	0.061249	0.0294253	0.121668	0.046029	0.0653999	0.0340375	-0.0383728	0.0958399	0.0783138	0.0727793	0.0151278	0.0967623	0.0128217	0.0372659	0.101836	0.0856932	0.0935338	0.123513	0.0999908	0.0451065							86	0.132104	-0.0260376	-0.0271493
		55	2231.2	0.0420402	-0.0449086	-0.0224991	0.0142524	0.0111151	-0.00233058	0.00439226	-0.0184654	0.0662424	0.0631051	0.114647	0.065346	0.0308354	0.122714	0.0402474	0.0666906	0.0339728	-0.0449086	0.0958229	0.0729652	0.0635532	0.0106669	0.0908928	0.00573682	0.0294909	0.102994	0.0855145	0.0864109	0.1263	0.0931337	0.039351							87	0.133641	-0.025725	-0.0259523
		60	2301.2	0.0503216	-0.0500608	-0.0274639	0.00730054	0.0199027	-0.0031288	0.00295498	-0.0252912	0.0659656	0.0724839	0.11029	0.073353	0.0424996	0.124631	0.0312011	0.0781331	0.0446723	-0.0504954	0.0863897	0.0637928	0.0542326	0.0125152	0.0855206	-0.000521467	0.0229446	0.10073	0.0859552	0.0742221	0.121154	0.0872588	0.0329393							88	0.135177	-0.0252912	-0.0256741
		65	2392	0.0576923	-0.0543478	-0.0263378	0.00041806	0.0225753	-0.00125418	-0.00041806	-0.0309365	0.0714883	0.0802676	0.105769	0.0673077	0.034699	0.117893	0.0229933	0.0852843	0.0459866	-0.0576923	0.0790134	0.0518395	0.0455686	0.0104515	0.0798495	-0.00710702	0.0129599	0.090301	0.0798495	0.0668896	0.110786	0.0719064	0.020903							89	0.136713	-0.0249169	-0.025403
		70	2500.6	0.0805407	-0.0658242	-0.0366312	-0.00823802	0.0301528	0.00335919	-0.000639846	-0.0398304	0.103735	0.104135	0.113333	0.0617452	0.0489483	0.12333	0.00735823	0.102935	0.0669439	-0.0690234	0.0673438	0.0317524	0.0317524	0.0129569	0.0697433	-0.0214349	-0.00223946	0.0933376	0.0765416	0.0461489	0.12613	0.058146	0.00895785							90	0.138249	-0.0245221	-0.0249739
		75	2681.4	0.110987	-0.0851794	-0.0486313	-0.0221526	0.0449765	0.000969643	-0.00947266	-0.0575819	0.154248	0.119564	0.116581	0.0621317	0.0595211	0.13299	-0.0206608	0.129634	0.0815246	-0.0818229	0.04162	0.00544492	-0.00425151	0.00656374	0.0453494	-0.0519878	-0.031849	0.0893563	0.0822705	0.0162602	0.122921	0.0188707	-0.0165585							91	0.139785	-0.0236351	-0.0245938
		80	2960.6	0.149429	-0.102885	-0.0552591	-0.0326285	0.041343	-0.00290482	-0.00695805	-0.0762008	0.16294	0.174086	0.132878	0.0660001	0.0741066	0.141998	-0.0606634	0.136932	0.0909951	-0.104911	0.0153347	-0.0235087	-0.0508681	0.00182395	0.0271567	-0.084645	-0.0765385	0.10079	0.0872796	-0.00898467	0.132878	-0.0245221	-0.0302641							92	0.141321	-0.0235087	-0.0242328
		85	3444.4	0.168563	-0.11044	-0.076472	-0.0422134	0.0605621	0.00656137	-0.0096969	-0.118569	0.188015	0.191499	0.146499	0.0718848	0.0866914	0.158112	-0.0814075	0.152596	0.113692	-0.132505	-0.0163744	-0.058762	-0.086343	0.0114969	0.0146905	-0.120021	-0.111892	0.110498	0.089885	-0.045407	0.131402	-0.073859	-0.0416328							93	0.142857	-0.0224991	-0.0239812
		90	4231	0.183172	-0.118884	-0.0995037	-0.0626329	0.0978492	-0.0359253	-0.00803593	-0.110612	0.209407	0.211298	0.176081	0.101394	0.105176	0.204916	-0.110376	0.173954	0.147956	-0.158828	-0.0321437	-0.0791775	-0.0787048	-0.0236351	0.0193808	-0.11723	-0.095013	0.145592	0.116285	-0.0692508	0.18459	-0.0645238	-0.0853226							94	0.144393	-0.0223858	-0.0238529
		95	5372.2	0.130077	-0.0264696	-0.0657459	-0.0845464	0.0466848	-0.00413239	0.0312349	-0.025725	0.185176	0.163769	0.12654	0.0623208	0.0675329	0.150925	-0.04769	0.140687	0.0829828	-0.0832434	-0.00189866	-0.012695	-0.0277726	0.00796694	0.0420312	-0.0221883	-0.000409516	0.0833551	0.0623208	0.0217416	0.121701	-0.0361491	-0.0640706							95	0.145929	-0.0223725	-0.0232516
	LaSRC	Percentile	Standard	07-19-20	07-09-22	07-01-19	08-02-19	07-17-19	07-06-21	08-07-21	08-10-22	07-01-22	06-23-22	08-11-22	07-17-22	06-15-22	08-02-22	07-10-22	07-12-20	07-28-20	08-11-19	07-02-22	08-04-20	06-20-21	06-13-21	07-10-19	07-31-21	07-26-22	07-18-22	07-26-19	06-26-20	06-16-22	06-24-19	07-15-21							96	0.147465	-0.0221883	-0.0231949
		1	1192.6	0.0783163	-0.0474593	0.00368942	-0.0139192	-0.0206272	0.0481301	-0.0382358	0.00117391	0.123596	0.144558	0.0271675	-0.00804964	0.0900553	0.0791548	-0.0239812	0.208284	0.105148	0.0338756	0.0758008	-0.0273352	0.0254905	0.0816703	0.0338756	-0.0407513	-0.0281737	0.0867013	0.0934094	0.0305215	0.119403	0.0732853	0.119403							97	0.149002	-0.0221526	-0.0224177
		3	1409.6	0.0534904	-0.0422815	-0.0181612	0.0123439	-0.0053916	0.0300795	-0.0224177	0.00737798	0.0868331	0.0790295	0.083286	0.00737798	0.0456867	0.0676788	0.0222758	0.107406	0.0669694	0.0194381	0.0265323	0.0251135	0.0350454	0.0279512	0.0286606	-0.0174518	0.0151816	0.0875426	0.0946368	0.0676788	0.113082	0.0783201	0.0903802							98	0.150538	-0.0216455	-0.0220123
		5	1508.2	0.0389869	-0.0352738	-0.0133934	0.0171065	-0.00742607	0.0343456	-0.0100782	0.0118021	0.0582151	0.0555629	0.0781064	0.0376608	0.0330195	0.072139	0.0383238	0.0999867	0.040313	0.00981302	0.0648455	0.0522477	0.0522477	0.0310304	0.0449543	0.00914998	0.0243999	0.0834107	0.0953454	0.0986607	0.135128	0.0853998	0.0754542							99	0.152074	-0.0215947	-0.021917
		10	1645.8	0.0177421	-0.0278284	-0.00595455	0.0232106	-0.00716977	0.0244258	-0.00595455	0.0068052	0.042654	0.0529834	0.0839713	0.0554138	0.025641	0.0943006	0.0462997	0.0839713	0.0371856	0.000729129	0.0882246	0.0815409	0.0663507	0.0262486	0.0894398	0.0232106	0.0402236	0.0839713	0.0900474	0.111921	0.131972	0.0979463	0.0864017							100	0.15361	-0.0214349	-0.0206272
		15	1731.2	0.019524	-0.0272643	-0.00704713	0.0247227	-0.0099353	0.019524	-0.00242606	0.00392791	0.0484057	0.0501386	0.0928835	0.0541821	0.0304991	0.0992375	0.049561	0.0720887	0.0287662	-0.00589187	0.0917283	0.0865296	0.0709335	0.0183688	0.0888401	0.0253004	0.0460952	0.0865296	0.0859519	0.113678	0.123498	0.103859	0.0801756							101	0.155146	-0.0206608	-0.0206062
		20	1797.2	0.0182506	-0.0245938	-0.0101269	0.0249277	-0.0084576	0.0204763	0.00155798	0.0021144	0.0510795	0.0494102	0.0944803	0.0622079	0.0343868	0.0994881	0.0655464	0.0672157	0.0282662	-0.00678834	0.0944803	0.086134	0.0805698	0.0176942	0.0911418	0.0265969	0.0533051	0.0939239	0.0911418	0.112286	0.126753	0.103939	0.0761184							102	0.156682	-0.0186185	-0.0194538
		25	1861.8	0.0194435	-0.0256741	-0.0117091	0.0221291	-0.00418949	0.0146095	0.000644538	-0.000966806	0.0516704	0.0489849	0.0973252	0.0650983	0.0296487	0.104308	0.0634869	0.0677839	0.0248147	-0.0170802	0.0983994	0.0892684	0.0817488	0.016758	0.0908798	0.0253518	0.0516704	0.0903427	0.0924911	0.110753	0.123644	0.105919	0.0736921							103	0.158218	-0.0184654	-0.0185901
		30	1926.4	0.0221138	-0.0287583	-0.0105897	0.0205565	-0.00332226	0.0127699	0.00394518	-0.00487957	0.0480689	0.048588	0.101537	0.0626038	0.0226329	0.105689	0.0579319	0.0672757	0.0215947	-0.0162998	0.0973837	0.0823297	0.0776578	0.013289	0.0911545	0.0247093	0.0470307	0.0942691	0.0927118	0.107766	0.120224	0.102575	0.0641611							104	0.159754	-0.0175602	-0.0181612
		35	1989.8	0.0247261	-0.028043	-0.0114584	0.0191979	-0.00442256	0.0116595	0.00311589	-0.00593024	0.047844	0.0543773	0.102121	0.0644286	0.0232184	0.105136	0.0619158	0.0614132	0.020203	-0.0220123	0.0965926	0.0840285	0.0749824	0.0116595	0.0910644	0.0292492	0.0413107	0.0935772	0.091567	0.106141	0.1177	0.0965926	0.0589004							105	0.16129	-0.0165585	-0.0174518
		40	2047	0.0268686	-0.0322423	-0.0117245	0.0210064	-0.00390816	0.0102589	0.00293112	-0.00439668	0.0542257	0.0556913	0.104055	0.0698583	0.0234489	0.116756	0.0586224	0.0639961	0.0263801	-0.025403	0.099658	0.0830484	0.0737665	0.00879336	0.0918417	0.0307767	0.0468979	0.098681	0.0913532	0.101124	0.119199	0.097704	0.0600879							106	0.162826	-0.0164866	-0.0174163
		45	2107.6	0.031505	-0.0330233	-0.011672	0.0158474	-0.00265705	0.00635794	0.00398558	-0.00929968	0.0552287	0.0571266	0.110268	0.0751566	0.0258113	0.115012	0.0566521	0.0609224	0.0267603	-0.0334978	0.0974568	0.0836971	0.0751566	0.00730689	0.0974568	0.0243879	0.0466882	0.101253	0.0879674	0.0969823	0.11691	0.0960334	0.0557032							107	0.164363	-0.0163744	-0.0170802
		50	2167.4	0.0311894	-0.0366338	-0.0167943	0.0145797	0.00765895	-0.000184553	0.0062748	-0.0117191	0.0570269	0.058411	0.113777	0.0745594	0.0274984	0.119313	0.0496447	0.0593338	0.0307281	-0.0380179	0.0948602	0.080096	0.0731752	0.00673618	0.0930147	0.0164252	0.0399557	0.099474	0.0851712	0.0874781	0.113315	0.0902464	0.0468764							108	0.165899	-0.0157807	-0.0168262
		55	2227.8	0.0409372	-0.0430021	-0.0232516	0.0122094	0.0131071	-0.00170572	0.00412963	-0.0174163	0.0638298	0.0624832	0.117246	0.0804381	0.031062	0.120837	0.0449771	0.0620343	0.0315109	-0.0438998	0.0943532	0.0728073	0.0638298	0.00547625	0.0889667	0.00906724	0.0319598	0.098393	0.0853757	0.0822336	0.115899	0.0831313	0.0404884							109	0.167435	-0.0157735	-0.0167943
		60	2298.4	0.0485555	-0.0471632	-0.0271493	0.0076575	0.0180995	-0.00321963	0.000696136	-0.0249739	0.0624782	0.0685694	0.112948	0.0855378	0.0385486	0.12426	0.0341977	0.0694396	0.0381135	-0.051079	0.0842325	0.0607379	0.0529064	0.00504699	0.0824922	0.00200139	0.0233206	0.0929342	0.0820571	0.0676993	0.110773	0.0746606	0.0298468							110	0.168971	-0.015055	-0.0162998
		65	2389	0.0556718	-0.0527417	-0.0259523	0.00083717	0.022185	-0.00334868	-0.00083717	-0.0318125	0.0678108	0.0766011	0.106739	0.0782754	0.0318125	0.11553	0.0246965	0.0766011	0.0389284	-0.0594391	0.0757639	0.0485559	0.0418585	-0.000418585	0.0719967	-0.00502302	0.0138133	0.0820427	0.0749267	0.0590205	0.0987861	0.0586019	0.0154877							111	0.170507	-0.0135692	-0.0154968
		70	2494.4	0.0804201	-0.0627004	-0.0374439	-0.00898012	0.0287043	0.00304682	-0.000160359	-0.0398493	0.0992623	0.100064	0.112893	0.0736049	0.0427357	0.121312	0.00946119	0.092848	0.0607761	-0.0731238	0.0639833	0.0327133	0.0295061	0.00264593	0.0627806	-0.0206062	-0.00216485	0.0852309	0.0716004	0.0387267	0.110087	0.0435375	0.000641437							112	0.172043	-0.013289	-0.0139192
		75	2673	0.108866	-0.0819304	-0.047138	-0.0231949	0.0433969	0.00149645	-0.0112233	-0.0587355	0.136551	0.113356	0.116723	0.0714553	0.0534979	0.132061	-0.0194538	0.117097	0.0714553	-0.0852974	0.03367	0.00299289	-0.00561167	-0.00561167	0.0389076	-0.0523756	-0.0325477	0.0796857	0.0755705	0.00748223	0.105874	0.00486345	-0.0276842							113	0.173579	-0.0130697	-0.0133934
		80	2947.8	0.146279	-0.0996675	-0.0525137	-0.0324988	0.0384015	-0.00366375	-0.0111269	-0.0762603	0.153403	0.16324	0.132031	0.0740213	0.0652012	0.136441	-0.05862	0.119818	0.0804668	-0.111202	0.0116019	-0.0287672	-0.0521745	-0.0118054	0.0207612	-0.0840627	-0.0786349	0.0858946	0.0736821	-0.0185901	0.111337	-0.0403012	-0.0464075							114	0.175115	-0.012695	-0.0131925
		85	3422	0.169492	-0.109293	-0.075979	-0.0420807	0.0578609	0.00204559	-0.00993571	-0.119813	0.177382	0.180596	0.143776	0.0756867	0.0718878	0.149912	-0.0815313	0.129456	0.0943892	-0.142022	-0.021917	-0.0622443	-0.0908825	-0.00701344	0.00613676	-0.122735	-0.118936	0.0870836	0.0698422	-0.0584454	0.104325	-0.0885447	-0.0669199							115	0.176651	-0.0116225	-0.0118054
		90	4184.2	0.182305	-0.113331	-0.0977965	-0.0629033	0.091726	-0.0401988	-0.0131925	-0.111419	0.193538	0.19545	0.165814	0.0991348	0.0902921	0.190192	-0.108073	0.1455	0.124468	-0.1683	-0.0409158	-0.0822618	-0.0844128	-0.0445007	0.00234214	-0.123608	-0.103054	0.118254	0.0850342	-0.0789159	0.14072	-0.0863247	-0.114287							116	0.178187	-0.0110017	-0.0117245
		95	5265.6	0.125988	-0.0272713	-0.0622151	-0.0808265	0.0443254	-0.00695077	0.032361	-0.03012	0.169287	0.147827	0.115732	0.0606579	0.0475539	0.133204	-0.0546187	0.112124	0.0619872	-0.0986782	-0.0154968	-0.0238529	-0.038856	-0.0168262	0.0179277	-0.0367669	-0.0242328	0.0553403	0.0327408	-0.00771042	0.0792692	-0.0587967	-0.106085							117	0.179724	-0.0108016	-0.0117191
																																									118	0.18126	-0.0107606	-0.0117091
																																									119	0.182796	-0.0103759	-0.011672
	Table 3		Rochestere		NIR Band 5			Copied values from the Error Table above converted to absolute values that are then averaged														These data feed to "a -Low refl% Error Distr L8.xlsx"																			120	0.184332	-0.0103474	-0.0114584
																																									121	0.185868	-0.0103381	-0.0112233
			Cum. %	890	891	892	893	898	903	904	908	912	916	932	934	937	942	944	945	950	951	954	957	959	962	973	974	982	994	995	996	1009	1018	1062	<-- Image Atm-I						122	0.187404	-0.0102854	-0.0111269
	CMAC		1	0.0681063	-0.032392	-0.00830565	-0.00249169	-0.0249169	0.0307309	-0.0215947	-0.0157807	0.113787	0.128738	0.0348837	-0.0564784	0.0747508	0.070598	-0.00913621	0.181063	0.0971761	0.000830565	0.0523256	-0.0672757	-0.013289	0.0498339	0.00166113	-0.0863787	-0.0747508	0.0506645	0.0481728	-0.000830565	0.101329	0.0357143	0.0456811							123	0.18894	-0.00988554	-0.0105897
			3	0.0538658	-0.0505969	-0.0186185	0.02473	-0.00938033	0.0375213	-0.0108016	0.00198977	0.0837123	0.0730529	0.0744741	-0.0299886	0.0325469	0.0616828	0.0133599	0.102189	0.0559977	-0.00298465	0.0176236	0.0140705	0.0225981	0.011228	0.0225981	-0.0449119	-0.0164866	0.070921	0.0680785	0.0503127	0.10361	0.0787379	0.0474702							124	0.190476	-0.0096969	-0.0101269
			5	0.0409738	-0.0401756	-0.0175602	0.0256751	-0.00891313	0.033657	-0.00691765	0.00705069	0.0549421	0.0582679	0.0709059	0.00572037	0.0263403	0.0768924	0.0276706	0.0908607	0.0349874	-0.00226154	0.0589331	0.050286	0.0383132	0.021019	0.037648	-0.0135692	0.0176932	0.0808833	0.0822136	0.0895304	0.136092	0.0868698	0.0409738							125	0.192012	-0.00947266	-0.0100782
			10	0.0216434	-0.0303253	-0.00342382	0.0228662	-0.0107606	0.0247004	0.000244559	0.00758132	0.0479335	0.056493	0.0803375	0.0320372	0.024089	0.0968452	0.0424309	0.0852287	0.0344828	-0.0070922	0.0864515	0.0778919	0.065664	0.0265346	0.0809489	0.0118611	0.0308144	0.0791147	0.0833945	0.110296	0.129249	0.104182	0.0693324							126	0.193548	-0.00939814	-0.00993571
			15	0.0220035	-0.0312681	-0.00579039	0.0260567	-0.0110017	0.0185292	-0.000579039	0.00115808	0.0486393	0.0509554	0.0856977	0.0341633	0.0231616	0.0949624	0.045165	0.0718008	0.0237406	-0.015055	0.0856977	0.0816445	0.0636943	0.0173712	0.0822235	0.0110017	0.0376375	0.0810654	0.0723798	0.109438	0.123914	0.109438	0.0631152							127	0.195084	-0.00938033	-0.0099353
			20	0.0198838	-0.0287087	-0.00860143	0.0265862	-0.00915996	0.0187668	0.00312779	0.00201072	0.054513	0.0489276	0.095286	0.0439008	0.0327301	0.0991957	0.0589812	0.071269	0.0277033	-0.0130697	0.0930518	0.0835567	0.079647	0.0176497	0.0897006	0.0137399	0.0478105	0.0908177	0.0824397	0.112042	0.131032	0.109249	0.0623324							128	0.196621	-0.00915996	-0.00929968
			Avg Abs.Value of Error --->	0.0377461	0.0355778	0.0103833	0.021401	0.0123554	0.0273176	0.00721089	0.00592855	0.0672546	0.0694057	0.0735975	0.0337148	0.0356031	0.0833627	0.0327906	0.100402	0.0456813	0.00688228	0.0656806	0.0624542	0.0472009	0.0239394	0.0524634	0.0302438	0.0375322	0.0755778	0.0727798	0.0787416	0.120871	0.0873653	0.0548175							129	0.198157	-0.00913621	-0.00898012
																																									130	0.199693	-0.00898467	-0.0084576
																																									131	0.201229	-0.00891313	-0.00804964
				890	891	892	893	898	903	904	908	912	916	932	934	937	942	944	945	950	951	954	957	959	962	973	974	982	994	995	996	1009	1018	1062	<-- Image Atm-I						132	0.202765	-0.00860143	-0.00771042
	LaSRC		1	0.0783163	-0.0474593	0.00368942	-0.0139192	-0.0206272	0.0481301	-0.0382358	0.00117391	0.123596	0.144558	0.0271675	-0.00804964	0.0900553	0.0791548	-0.0239812	0.208284	0.105148	0.0338756	0.0758008	-0.0273352	0.0254905	0.0816703	0.0338756	-0.0407513	-0.0281737	0.0867013	0.0934094	0.0305215	0.119403	0.0732853	0.119403							133	0.204301	-0.00830565	-0.00742607
			3	0.0534904	-0.0422815	-0.0181612	0.0123439	-0.0053916	0.0300795	-0.0224177	0.00737798	0.0868331	0.0790295	0.083286	0.00737798	0.0456867	0.0676788	0.0222758	0.107406	0.0669694	0.0194381	0.0265323	0.0251135	0.0350454	0.0279512	0.0286606	-0.0174518	0.0151816	0.0875426	0.0946368	0.0676788	0.113082	0.0783201	0.0903802							134	0.205837	-0.00823802	-0.00716977
			5	0.0389869	-0.0352738	-0.0133934	0.0171065	-0.00742607	0.0343456	-0.0100782	0.0118021	0.0582151	0.0555629	0.0781064	0.0376608	0.0330195	0.072139	0.0383238	0.0999867	0.040313	0.00981302	0.0648455	0.0522477	0.0522477	0.0310304	0.0449543	0.00914998	0.0243999	0.0834107	0.0953454	0.0986607	0.135128	0.0853998	0.0754542							135	0.207373	-0.00803593	-0.00704713
			10	0.0177421	-0.0278284	-0.00595455	0.0232106	-0.00716977	0.0244258	-0.00595455	0.0068052	0.042654	0.0529834	0.0839713	0.0554138	0.025641	0.0943006	0.0462997	0.0839713	0.0371856	0.000729129	0.0882246	0.0815409	0.0663507	0.0262486	0.0894398	0.0232106	0.0402236	0.0839713	0.0900474	0.111921	0.131972	0.0979463	0.0864017							136	0.208909	-0.00710702	-0.00701344
			15	0.019524	-0.0272643	-0.00704713	0.0247227	-0.0099353	0.019524	-0.00242606	0.00392791	0.0484057	0.0501386	0.0928835	0.0541821	0.0304991	0.0992375	0.049561	0.0720887	0.0287662	-0.00589187	0.0917283	0.0865296	0.0709335	0.0183688	0.0888401	0.0253004	0.0460952	0.0865296	0.0859519	0.113678	0.123498	0.103859	0.0801756							137	0.210445	-0.0070922	-0.00695077
			20	0.0182506	-0.0245938	-0.0101269	0.0249277	-0.0084576	0.0204763	0.00155798	0.0021144	0.0510795	0.0494102	0.0944803	0.0622079	0.0343868	0.0994881	0.0655464	0.0672157	0.0282662	-0.00678834	0.0944803	0.086134	0.0805698	0.0176942	0.0911418	0.0265969	0.0533051	0.0939239	0.0911418	0.112286	0.126753	0.103939	0.0761184							138	0.211982	-0.00695805	-0.00678834
			Avg Abs.Value of Error --->	0.0377184	0.0341169	0.00972877	0.0193718	0.00983459	0.0294969	0.0134451	0.00553359	0.0684638	0.0719471	0.0766492	0.037482	0.0432147	0.0853331	0.040998	0.106492	0.0511081	0.012756	0.073602	0.0598168	0.0551063	0.0338272	0.0628187	0.0237435	0.0345632	0.0870132	0.0917554	0.0891244	0.124973	0.0904583	0.0879889							139	0.213518	-0.00691765	-0.00595455
																																									140	0.215054	-0.00579039	-0.00595455
																																									141	0.21659	-0.00524352	-0.00593024
																																									142	0.218126	-0.00520291	-0.00589187
																																									143	0.219662	-0.00499217	-0.00561167
																																									144	0.221198	-0.00495369	-0.00561167
																																									145	0.222734	-0.00468262	-0.0053916
																																									146	0.22427	-0.00450274	-0.00502302
																																									147	0.225806	-0.00425151	-0.00487957
																																									148	0.227343	-0.00423515	-0.00442256
																																									149	0.228879	-0.00413239	-0.00439668
																																									150	0.230415	-0.00342382	-0.00418949
																																									151	0.231951	-0.0031288	-0.00390816
																																									152	0.233487	-0.00298465	-0.00366375
																																									153	0.235023	-0.00290482	-0.00334868
																																									154	0.236559	-0.00249169	-0.00332226
																																									155	0.238095	-0.00233058	-0.00321963
																																									156	0.239631	-0.00226154	-0.00265705
																																									157	0.241167	-0.00223946	-0.00242606
																																									158	0.242704	-0.00189866	-0.00216485
																																									159	0.24424	-0.00125418	-0.00170572
																																									160	0.245776	-0.00118458	-0.000966806
																																									161	0.247312	-0.000830565	-0.00083717
																																									162	0.248848	-0.000639846	-0.000418585
																																									163	0.250384	-0.000579039	-0.000184553
																																									164	0.25192	-0.000553454	-0.000160359
																																									165	0.253456	-0.000521467	0.000641437
																																									166	0.254992	-0.00041806	0.000644538
																																									167	0.256528	-0.000409516	0.000696136
																																									168	0.258065	-0.000379723	0.000729129
																																									169	0.259601	0.000244559	0.00083717
																																									170	0.261137	0.00041806	0.00117391
																																									171	0.262673	0.000830565	0.00149645
																																									172	0.264209	0.000969643	0.00155798
																																									173	0.265745	0.00115808	0.00200139
																																									174	0.267281	0.00166113	0.00204559
																																									175	0.268817	0.00182395	0.0021144
																																									176	0.270353	0.00198977	0.00234214
																																									177	0.271889	0.00201072	0.00264593
																																									178	0.273425	0.00204609	0.00293112
																																									179	0.274962	0.00295498	0.00299289
																																									180	0.276498	0.00312779	0.00304682
																																									181	0.278034	0.00332811	0.00311589
																																									182	0.27957	0.00335919	0.00368942
																																									183	0.281106	0.0038318	0.00392791
																																									184	0.282642	0.00439226	0.00394518
																																									185	0.284178	0.00484147	0.00398558
																																									186	0.285714	0.00531612	0.00412963
																																									187	0.28725	0.00544492	0.00486345
																																									188	0.288786	0.00572037	0.00504699
																																									189	0.290323	0.00573682	0.00547625
																																									190	0.291859	0.00656137	0.00613676
																																									191	0.293395	0.00656374	0.0062748
																																									192	0.294931	0.00676379	0.00635794
																																									193	0.296467	0.00682594	0.00673618
																																									194	0.298003	0.00705069	0.0068052
																																									195	0.299539	0.00730054	0.00730689
																																									196	0.301075	0.00735823	0.00737798
																																									197	0.302611	0.00758132	0.00737798
																																									198	0.304147	0.00774836	0.00748223
																																									199	0.305684	0.00796694	0.0076575
																																									200	0.30722	0.00895785	0.00765895
																																									201	0.308756	0.0104515	0.00879336
																																									202	0.310292	0.0106669	0.00906724
																																									203	0.311828	0.0110017	0.00914998
																																									204	0.313364	0.0111151	0.00946119
																																									205	0.3149	0.011228	0.00981302
																																									206	0.316436	0.0114969	0.0102589
																																									207	0.317972	0.0118611	0.0116019
																																									208	0.319508	0.0121378	0.0116595
																																									209	0.321045	0.0124359	0.0116595
																																									210	0.322581	0.0125152	0.0118021
																																									211	0.324117	0.0126273	0.0122094
																																									212	0.325653	0.0128217	0.0123439
																																									213	0.327189	0.0129569	0.0127699
																																									214	0.328725	0.0129599	0.0131071
																																									215	0.330261	0.0133599	0.013289
																																									216	0.331797	0.0134113	0.0138133
																																									217	0.333333	0.0135276	0.0145797
																																									218	0.334869	0.0135276	0.0146095
																																									219	0.336406	0.0137399	0.0151816
																																									220	0.337942	0.0140705	0.0154877
																																									221	0.339478	0.0142524	0.0158474
																																									222	0.341014	0.0146905	0.0164252
																																									223	0.34255	0.0149688	0.016758
																																									224	0.344086	0.0151278	0.0171065
																																									225	0.345622	0.0151278	0.0176942
																																									226	0.347158	0.0153347	0.0177421
																																									227	0.348694	0.0155072	0.0179277
																																									228	0.35023	0.0159322	0.0180995
																																									229	0.351767	0.0162331	0.0182506
																																									230	0.353303	0.0162602	0.0183688
																																									231	0.354839	0.0173712	0.0191979
																																									232	0.356375	0.0176236	0.0194381
																																									233	0.357911	0.0176497	0.0194435
																																									234	0.359447	0.0176932	0.019524
																																									235	0.360983	0.0181994	0.019524
																																									236	0.362519	0.0185292	0.020203
																																									237	0.364055	0.0187305	0.0204763
																																									238	0.365591	0.0187668	0.0205565
																																									239	0.367127	0.0188707	0.0207612
																																									240	0.368664	0.0193808	0.0210064
																																									241	0.3702	0.0198838	0.0215947
																																									242	0.371736	0.0199027	0.0221138
																																									243	0.373272	0.0199657	0.0221291
																																									244	0.374808	0.0200304	0.022185
																																									245	0.376344	0.0204581	0.0222758
																																									246	0.37788	0.0208117	0.0226329
																																									247	0.379416	0.020903	0.0232106
																																									248	0.380952	0.021019	0.0232106
																																									249	0.382488	0.0213319	0.0232184
																																									250	0.384025	0.0216434	0.0233206
																																									251	0.385561	0.0217416	0.0234489
																																									252	0.387097	0.0220035	0.0243879
																																									253	0.388633	0.0223725	0.0243999
																																									254	0.390169	0.022507	0.0244258
																																									255	0.391705	0.0225753	0.0246965
																																									256	0.393241	0.0225981	0.0247093
																																									257	0.394777	0.0225981	0.0247227
																																									258	0.396313	0.0228662	0.0247261
																																									259	0.397849	0.0229446	0.0248147
																																									260	0.399386	0.0229933	0.0249277
																																									261	0.400922	0.0231616	0.0251135
																																									262	0.402458	0.0235839	0.0253004
																																									263	0.403994	0.0237406	0.0253518
																																									264	0.40553	0.0238841	0.0254905
																																									265	0.407066	0.0239334	0.025641
																																									266	0.408602	0.0239992	0.0258113
																																									267	0.410138	0.0239992	0.0262486
																																									268	0.411674	0.0239992	0.0263801
																																									269	0.41321	0.024089	0.0265323
																																									270	0.414747	0.0247004	0.0265969
																																									271	0.416283	0.02473	0.0267603
																																									272	0.417819	0.024863	0.0268686
																																									273	0.419355	0.0256751	0.0271675
																																									274	0.420891	0.0257262	0.0274984
																																									275	0.422427	0.0257377	0.0279512
																																									276	0.423963	0.0260567	0.0282662
																																									277	0.425499	0.0263403	0.0286606
																																									278	0.427035	0.0265346	0.0287043
																																									279	0.428571	0.0265862	0.0287662
																																									280	0.430108	0.0270243	0.0292492
																																									281	0.431644	0.0271567	0.0295061
																																									282	0.43318	0.027353	0.0296487
																																									283	0.434716	0.0276706	0.0298468
																																									284	0.436252	0.0277033	0.0300795
																																									285	0.437788	0.0280995	0.0304991
																																									286	0.439324	0.0287784	0.0305215
																																									287	0.44086	0.0294253	0.0307281
																																									288	0.442396	0.0294909	0.0307767
																																									289	0.443932	0.0301528	0.0310304
																																									290	0.445469	0.0302467	0.031062
																																									291	0.447005	0.0307309	0.0311894
																																									292	0.448541	0.0308144	0.031505
																																									293	0.450077	0.0308354	0.0315109
																																									294	0.451613	0.0312011	0.0318125
																																									295	0.453149	0.0312349	0.0319598
																																									296	0.454685	0.0317524	0.032361
																																									297	0.456221	0.0317524	0.0327133
																																									298	0.457757	0.0320372	0.0327408
																																									299	0.459293	0.0325469	0.0330195
																																									300	0.460829	0.0327301	0.03367
																																									301	0.462366	0.0329393	0.0338756
																																									302	0.463902	0.033115	0.0338756
																																									303	0.465438	0.0333207	0.0341977
																																									304	0.466974	0.033657	0.0343456
																																									305	0.46851	0.0339728	0.0343868
																																									306	0.470046	0.0340375	0.0350454
																																									307	0.471582	0.0341633	0.0371856
																																									308	0.473118	0.0344828	0.0376608
																																									309	0.474654	0.034699	0.0381135
																																									310	0.47619	0.0348837	0.0383238
																																									311	0.477727	0.0349874	0.0384015
																																									312	0.479263	0.0357143	0.0385486
																																									313	0.480799	0.0372659	0.0387267
																																									314	0.482335	0.0375213	0.0389076
																																									315	0.483871	0.0376375	0.0389284
																																									316	0.485407	0.037648	0.0389869
																																									317	0.486943	0.0383132	0.0399557
																																									318	0.488479	0.0391247	0.0402236
																																									319	0.490015	0.039351	0.040313
																																									320	0.491551	0.0402474	0.0404884
																																									321	0.493088	0.0409738	0.0409372
																																									322	0.494624	0.0409738	0.0413107
																																									323	0.49616	0.041343	0.0418585
																																									324	0.497696	0.04162	0.042654
																																									325	0.499232	0.0420312	0.0427357
																																									326	0.500768	0.0420402	0.0433969
																																									327	0.502304	0.0424309	0.0435375
																																									328	0.50384	0.0424824	0.0443254
																																									329	0.505376	0.0424996	0.0449543
																																									330	0.506912	0.0437045	0.0449771
																																									331	0.508449	0.0439008	0.0456867
																																									332	0.509985	0.0442377	0.0460952
																																									333	0.511521	0.0445832	0.0462997
																																									334	0.513057	0.0446723	0.0466882
																																									335	0.514593	0.0449765	0.0468764
																																									336	0.516129	0.0451065	0.0468979
																																									337	0.517665	0.045165	0.0470307
																																									338	0.519201	0.0453494	0.0475539
																																									339	0.520737	0.0455686	0.047844
																																									340	0.522273	0.0456601	0.0480689
																																									341	0.52381	0.0456811	0.0481301
																																									342	0.525346	0.0459866	0.0484057
																																									343	0.526882	0.046029	0.0485555
																																									344	0.528418	0.0461489	0.0485559
																																									345	0.529954	0.0463059	0.048588
																																									346	0.53149	0.0466848	0.0489849
																																									347	0.533026	0.0474702	0.0494102
																																									348	0.534562	0.0478105	0.049561
																																									349	0.536098	0.0479335	0.0496447
																																									350	0.537634	0.0481728	0.0501386
																																									351	0.539171	0.0483524	0.0510795
																																									352	0.540707	0.0486393	0.0516704
																																									353	0.542243	0.0489276	0.0516704
																																									354	0.543779	0.0489483	0.0522477
																																									355	0.545315	0.0498339	0.0522477
																																									356	0.546851	0.050286	0.0529064
																																									357	0.548387	0.0503127	0.0529834
																																									358	0.549923	0.0503216	0.0533051
																																									359	0.551459	0.0504683	0.0534904
																																									360	0.552995	0.0506645	0.0534979
																																									361	0.554531	0.0509554	0.0541821
																																									362	0.556068	0.0513575	0.0542257
																																									363	0.557604	0.0515088	0.0543773
																																									364	0.55914	0.0518395	0.0552287
																																									365	0.560676	0.0522335	0.0553403
																																									366	0.562212	0.0523256	0.0554138
																																									367	0.563748	0.0537461	0.0555629
																																									368	0.565284	0.0538658	0.0556718
																																									369	0.56682	0.0542054	0.0556913
																																									370	0.568356	0.0542287	0.0557032
																																									371	0.569892	0.0542326	0.0566521
																																									372	0.571429	0.0542753	0.0570269
																																									373	0.572965	0.054513	0.0571266
																																									374	0.574501	0.0547545	0.0578609
																																									375	0.576037	0.0549421	0.0579319
																																									376	0.577573	0.0551509	0.0582151
																																									377	0.579109	0.0552075	0.058411
																																									378	0.580645	0.0552586	0.0586019
																																									379	0.582181	0.0556969	0.0586224
																																									380	0.583717	0.0559977	0.0589004
																																									381	0.585253	0.056493	0.0590205
																																									382	0.58679	0.0571652	0.0593338
																																									383	0.588326	0.057232	0.0600879
																																									384	0.589862	0.0576923	0.0606579
																																									385	0.591398	0.058146	0.0607379
																																									386	0.592934	0.0582679	0.0607761
																																									387	0.59447	0.0582838	0.0609224
																																									388	0.596006	0.0584773	0.0614132
																																									389	0.597542	0.0589331	0.0619158
																																									390	0.599078	0.0589812	0.0619872
																																									391	0.600614	0.0591213	0.0620343
																																									392	0.602151	0.0591229	0.0622079
																																									393	0.603687	0.0594266	0.0624782
																																									394	0.605223	0.0595211	0.0624832
																																									395	0.606759	0.0603265	0.0626038
																																									396	0.608295	0.0605621	0.0627806
																																									397	0.609831	0.0608506	0.0634869
																																									398	0.611367	0.061249	0.0638298
																																									399	0.612903	0.0616828	0.0638298
																																									400	0.614439	0.0617102	0.0639833
																																									401	0.615975	0.0617452	0.0639961
																																									402	0.617512	0.0618135	0.0641611
																																									403	0.619048	0.0621317	0.0644286
																																									404	0.620584	0.0623208	0.0648455
																																									405	0.62212	0.0623208	0.0650983
																																									406	0.623656	0.0623324	0.0652012
																																									407	0.625192	0.0631051	0.0655464
																																									408	0.626728	0.0631152	0.0663507
																																									409	0.628264	0.0635532	0.0669694
																																									410	0.6298	0.0636943	0.0672157
																																									411	0.631336	0.0637928	0.0672757
																																									412	0.632873	0.065346	0.0676788
																																									413	0.634409	0.0653999	0.0676788
																																									414	0.635945	0.065664	0.0676993
																																									415	0.637481	0.0659656	0.0677839
																																									416	0.639017	0.0660001	0.0678108
																																									417	0.640553	0.0660718	0.0685694
																																									418	0.642089	0.0662424	0.0694396
																																									419	0.643625	0.0666906	0.0698422
																																									420	0.645161	0.0668896	0.0698583
																																									421	0.646697	0.0669439	0.0709335
																																									422	0.648233	0.0673077	0.0714553
																																									423	0.64977	0.0673438	0.0714553
																																									424	0.651306	0.0673591	0.0716004
																																									425	0.652842	0.0675329	0.0718878
																																									426	0.654378	0.0680785	0.0719967
																																									427	0.655914	0.0681063	0.0720887
																																									428	0.65745	0.0693324	0.072139
																																									429	0.658986	0.069719	0.0728073
																																									430	0.660522	0.0697433	0.0731752
																																									431	0.662058	0.0703798	0.0732853
																																									432	0.663594	0.070598	0.0736049
																																									433	0.665131	0.0709059	0.0736821
																																									434	0.666667	0.070921	0.0736921
																																									435	0.668203	0.070967	0.0737665
																																									436	0.669739	0.071269	0.0740213
																																									437	0.671275	0.0714883	0.0745594
																																									438	0.672811	0.0718008	0.0746606
																																									439	0.674347	0.0718848	0.0749267
																																									440	0.675883	0.0719064	0.0749824
																																									441	0.677419	0.0723798	0.0751566
																																									442	0.678955	0.0724839	0.0751566
																																									443	0.680492	0.0727793	0.0754542
																																									444	0.682028	0.0729652	0.0755705
																																									445	0.683564	0.0730529	0.0756867
																																									446	0.6851	0.073353	0.0757639
																																									447	0.686636	0.0741066	0.0758008
																																									448	0.688172	0.0742221	0.0761184
																																									449	0.689708	0.0744741	0.0766011
																																									450	0.691244	0.0747508	0.0766011
																																									451	0.69278	0.0747847	0.0776578
																																									452	0.694316	0.0755648	0.0781064
																																									453	0.695853	0.0765416	0.0782754
																																									454	0.697389	0.0768924	0.0783163
																																									455	0.698925	0.0774428	0.0783201
																																									456	0.700461	0.0775234	0.0790295
																																									457	0.701997	0.0778919	0.0791548
																																									458	0.703533	0.0781331	0.0792692
																																									459	0.705069	0.0783138	0.0796857
																																									460	0.706605	0.0787379	0.080096
																																									461	0.708141	0.0790134	0.0801756
																																									462	0.709677	0.0791147	0.0804201
																																									463	0.711214	0.079647	0.0804381
																																									464	0.71275	0.0798495	0.0804668
																																									465	0.714286	0.0798495	0.0805698
																																									466	0.715822	0.0802676	0.0815409
																																									467	0.717358	0.0803375	0.0816703
																																									468	0.718894	0.0805407	0.0817488
																																									469	0.72043	0.0806452	0.0820427
																																									470	0.721966	0.0808833	0.0820571
																																									471	0.723502	0.0809489	0.0822336
																																									472	0.725038	0.0810654	0.0823297
																																									473	0.726575	0.0811975	0.0824922
																																									474	0.728111	0.0815246	0.0830484
																																									475	0.729647	0.0816445	0.0831313
																																									476	0.731183	0.0817353	0.083286
																																									477	0.732719	0.0819804	0.0834107
																																									478	0.734255	0.0821261	0.0836971
																																									479	0.735791	0.0822136	0.0839713
																																									480	0.737327	0.0822235	0.0839713
																																									481	0.738863	0.0822705	0.0839713
																																									482	0.740399	0.0824397	0.0840285
																																									483	0.741935	0.0829828	0.0842325
																																									484	0.743472	0.0833551	0.0850342
																																									485	0.745008	0.0833945	0.0851712
																																									486	0.746544	0.0835567	0.0852309
																																									487	0.74808	0.0837123	0.0853757
																																									488	0.749616	0.0852287	0.0853998
																																									489	0.751152	0.0852843	0.0855378
																																									490	0.752688	0.0855051	0.0858946
																																									491	0.754224	0.0855145	0.0859519
																																									492	0.75576	0.0855206	0.086134
																																									493	0.757296	0.0856932	0.0864017
																																									494	0.758833	0.0856977	0.0865296
																																									495	0.760369	0.0856977	0.0865296
																																									496	0.761905	0.0859552	0.0867013
																																									497	0.763441	0.0863897	0.0868331
																																									498	0.764977	0.0864109	0.0870836
																																									499	0.766513	0.0864515	0.0874781
																																									500	0.768049	0.086582	0.0875426
																																									501	0.769585	0.0866914	0.0879674
																																									502	0.771121	0.0868698	0.0882246
																																									503	0.772657	0.0872588	0.0888401
																																									504	0.774194	0.0872796	0.0889667
																																									505	0.77573	0.0874089	0.0892684
																																									506	0.777266	0.0874312	0.0894398
																																									507	0.778802	0.0892742	0.0900474
																																									508	0.780338	0.0893563	0.0900553
																																									509	0.781874	0.0895304	0.0902464
																																									510	0.78341	0.0897006	0.0902921
																																									511	0.784946	0.089885	0.0903427
																																									512	0.786482	0.0900104	0.0903802
																																									513	0.788018	0.0900474	0.0908798
																																									514	0.789555	0.090301	0.0910644
																																									515	0.791091	0.0908177	0.0911418
																																									516	0.792627	0.0908607	0.0911418
																																									517	0.794163	0.0908928	0.0911545
																																									518	0.795699	0.0909358	0.0913532
																																									519	0.797235	0.0909951	0.091567
																																									520	0.798771	0.0920641	0.091726
																																									521	0.800307	0.0924041	0.0917283
																																									522	0.801843	0.0925048	0.0918417
																																									523	0.803379	0.0926119	0.0924911
																																									524	0.804916	0.0930518	0.0927118
																																									525	0.806452	0.0931337	0.092848
																																									526	0.807988	0.0933376	0.0928835
																																									527	0.809524	0.0935338	0.0929342
																																									528	0.81106	0.0935817	0.0930147
																																									529	0.812596	0.0949624	0.0934094
																																									530	0.814132	0.095286	0.0935772
																																									531	0.815668	0.0958229	0.0939239
																																									532	0.817204	0.0958399	0.0942691
																																									533	0.81874	0.0967623	0.0943006
																																									534	0.820276	0.0968452	0.0943532
																																									535	0.821813	0.0971761	0.0943892
																																									536	0.823349	0.0973989	0.0944803
																																									537	0.824885	0.0976102	0.0944803
																																									538	0.826421	0.0978492	0.0946368
																																									539	0.827957	0.0978736	0.0948602
																																									540	0.829493	0.0983351	0.0953454
																																									541	0.831029	0.0983351	0.0960334
																																									542	0.832565	0.0989662	0.0965926
																																									543	0.834101	0.0991957	0.0965926
																																									544	0.835637	0.0996269	0.0969823
																																									545	0.837174	0.0997722	0.0973252
																																									546	0.83871	0.0999908	0.0973837
																																									547	0.840246	0.100131	0.0974568
																																									548	0.841782	0.100724	0.0974568
																																									549	0.843318	0.10073	0.097704
																																									550	0.844854	0.10079	0.0979463
																																									551	0.84639	0.101329	0.098393
																																									552	0.847926	0.101394	0.0983994
																																									553	0.849462	0.101836	0.0986607
																																									554	0.850998	0.102189	0.098681
																																									555	0.852535	0.102193	0.0987861
																																									556	0.854071	0.102682	0.0991348
																																									557	0.855607	0.102935	0.0992375
																																									558	0.857143	0.102994	0.0992623
																																									559	0.858679	0.103569	0.099474
																																									560	0.860215	0.10361	0.0994881
																																									561	0.861751	0.103735	0.099658
																																									562	0.863287	0.104135	0.0999867
																																									563	0.864823	0.104182	0.100064
																																									564	0.866359	0.104579	0.101124
																																									565	0.867896	0.105129	0.101253
																																									566	0.869432	0.105176	0.101537
																																									567	0.870968	0.105428	0.102121
																																									568	0.872504	0.105468	0.102575
																																									569	0.87404	0.105677	0.103859
																																									570	0.875576	0.105769	0.103939
																																									571	0.877112	0.106108	0.104055
																																									572	0.878648	0.106685	0.104308
																																									573	0.880184	0.107367	0.104325
																																									574	0.88172	0.10812	0.105136
																																									575	0.883257	0.108198	0.105148
																																									576	0.884793	0.108741	0.105689
																																									577	0.886329	0.109249	0.105874
																																									578	0.887865	0.109438	0.105919
																																									579	0.889401	0.109438	0.106141
																																									580	0.890937	0.11029	0.106739
																																									581	0.892473	0.110296	0.107406
																																									582	0.894009	0.110302	0.107766
																																									583	0.895545	0.110498	0.108866
																																									584	0.897081	0.110786	0.110087
																																									585	0.898618	0.110987	0.110268
																																									586	0.900154	0.112042	0.110753
																																									587	0.90169	0.112905	0.110773
																																									588	0.903226	0.113333	0.111337
																																									589	0.904762	0.113692	0.111921
																																									590	0.906298	0.113787	0.112124
																																									591	0.907834	0.114043	0.112286
																																									592	0.90937	0.114647	0.112893
																																									593	0.910906	0.115407	0.112948
																																									594	0.912442	0.116285	0.113082
																																									595	0.913978	0.116581	0.113315
																																									596	0.915515	0.11686	0.113356
																																									597	0.917051	0.117893	0.113678
																																									598	0.918587	0.119564	0.113777
																																									599	0.920123	0.121154	0.115012
																																									600	0.921659	0.121668	0.11553
																																									601	0.923195	0.121701	0.115732
																																									602	0.924731	0.122714	0.115899
																																									603	0.926267	0.122921	0.116723
																																									604	0.927803	0.123324	0.116756
																																									605	0.929339	0.12333	0.11691
																																									606	0.930876	0.123513	0.117097
																																									607	0.932412	0.123914	0.117246
																																									608	0.933948	0.124631	0.1177
																																									609	0.935484	0.12487	0.118254
																																									610	0.93702	0.124929	0.119199
																																									611	0.938556	0.12613	0.119313
																																									612	0.940092	0.1263	0.119403
																																									613	0.941628	0.12654	0.119403
																																									614	0.943164	0.127153	0.119818
																																									615	0.9447	0.128042	0.120224
																																									616	0.946237	0.128738	0.120837
																																									617	0.947773	0.129249	0.121312
																																									618	0.949309	0.129634	0.123498
																																									619	0.950845	0.130077	0.123596
																																									620	0.952381	0.131032	0.123644
																																									621	0.953917	0.131402	0.12426
																																									622	0.955453	0.132878	0.124468
																																									623	0.956989	0.132878	0.125988
																																									624	0.958525	0.13299	0.126753
																																									625	0.960061	0.136092	0.129456
																																									626	0.961598	0.136932	0.131972
																																									627	0.963134	0.140687	0.132031
																																									628	0.96467	0.141998	0.132061
																																									629	0.966206	0.145592	0.133204
																																									630	0.967742	0.146499	0.135128
																																									631	0.969278	0.147956	0.136441
																																									632	0.970814	0.149429	0.136551
																																									633	0.97235	0.150925	0.14072
																																									634	0.973886	0.152596	0.143776
																																									635	0.975422	0.154248	0.144558
																																									636	0.976959	0.158112	0.1455
																																									637	0.978495	0.16294	0.146279
																																									638	0.980031	0.163769	0.147827
																																									639	0.981567	0.168563	0.149912
																																									640	0.983103	0.173954	0.153403
																																									641	0.984639	0.174086	0.16324
																																									642	0.986175	0.176081	0.165814
																																									643	0.987711	0.181063	0.169287
																																									644	0.989247	0.183172	0.169492
																																									645	0.990783	0.18459	0.177382
																																									646	0.99232	0.185176	0.180596
																																									647	0.993856	0.188015	0.182305
																																									648	0.995392	0.191499	0.190192
																																									649	0.996928	0.204916	0.193538
																																									650	0.998464	0.209407	0.19545
																																									651	1	0.211298	0.208284

## Sheet: B2 CDF
		Data Excerpted from Groups, this page.					Averages (n=5) to control uncertainty, n=6 for Group 6.
			TOA Reflectance					TOAR	CMAC						CMAC	LaSRC						LaSRC
		1	2	3	4	5	6	Overall	1	2	3	4	5	6	Overall	1	2	3	4	5	6	Overall
	Percentile	892.8	908.6	937.8	951.4	970	1012.33	Avgs	892.8	908.6	937.8	951.4	970	1012.33	Avgs	892.8	908.6	937.8	951.4	970	1012.33	Avgs
	1	1128	1157.4	1196	1228.8	1245.2	1331.83	1214.54	372	380.8	379.2	396.6	385	430.167	390.628	301.2	302.6	312.4	381	300.4	381.167	329.794
	3	1184.8	1210.6	1248.2	1279.6	1291.6	1377.17	1265.33	438.6	446.6	446.4	464	448	490.167	455.628	412.4	427.8	433.2	478.2	414.4	501.5	444.583
	5	1222.6	1249	1286.2	1314.6	1331	1413.33	1302.79	488.6	494.8	497.4	509.2	500.8	542.333	505.522	474.4	495.4	505.6	534.6	481.8	561.333	508.856
	10	1303.6	1333	1369.8	1395.2	1403.8	1485	1381.73	588.4	602	606.6	614.2	599.4	644.333	609.156	584.6	605.2	609.6	634.2	590.4	668	615.333
	15	1372.6	1400.6	1440.4	1458.4	1468.4	1542.67	1447.18	675	688.2	701.2	700.2	686.6	724.667	695.978	672.4	686	695.4	714.2	676	749.833	698.972
	20	1433.4	1458.8	1505.2	1517	1528.2	1596.17	1506.46	751	760.6	784.8	776	769.8	803.5	774.283	747.4	762.6	783.8	786.4	758.6	818.167	776.161
	25	1489	1518.6	1571.2	1574.2	1578.4	1653.5	1564.15	821.4	837.8	869	853.8	836.8	881.5	850.05	817	837.8	865.6	864.8	828.4	890.167	850.628
	30	1548.6	1582	1635.2	1635.8	1635.8	1707	1624.07	893.6	918	952.8	934.4	912.8	957.833	928.239	888.6	917.4	944	938	903.8	963	925.8
	35	1607	1643.8	1704.4	1693.6	1692	1764.33	1684.19	967.8	995.4	1043.4	1011	989.4	1038.67	1007.61	966.8	1005	1029.4	1016.2	980.8	1042.5	1006.78
	40	1679	1711.2	1778.8	1760	1757.2	1825.67	1751.98	1054.8	1082.4	1141.4	1100.6	1077.2	1125.5	1096.98	1049.6	1085	1127	1098.8	1069.8	1126.33	1092.76
	45	1752.8	1787	1856.8	1827.8	1822.2	1887.5	1822.35	1147.8	1176.4	1241.8	1190.8	1166	1214.83	1189.61	1143.8	1174.6	1220	1181.4	1151.4	1207.5	1179.78
	50	1826	1862	1933.2	1895.8	1892.2	1954.17	1893.89	1239.8	1273.6	1343.2	1280.8	1262	1306.67	1284.34	1228.4	1260.2	1314.6	1262.6	1233.4	1289	1264.7
	55	1902.2	1939.8	2022	1972.2	1961.6	2027.33	1970.86	1334.8	1370.8	1458.8	1383.4	1356.4	1411.5	1385.95	1321.4	1353.6	1415.6	1356.2	1319.2	1380	1357.67
	60	1983.8	2018.2	2115.6	2049	2041.2	2098.17	2050.99	1436	1469.6	1579.8	1482.4	1464.2	1511.5	1490.58	1411.4	1448.6	1530.8	1452.2	1414.2	1478.5	1455.95
	65	2068.4	2093.6	2197.6	2122.8	2121.8	2173.83	2129.67	1540.4	1564.2	1686.4	1582.6	1571	1617.5	1593.68	1508.6	1538.6	1645.6	1541	1520.4	1572	1554.37
	70	2145.8	2179.2	2284.8	2195.8	2190	2248.5	2207.35	1635.2	1673.2	1799.6	1678.4	1663.2	1723	1695.43	1611.2	1650.8	1760.4	1636	1613	1669	1656.73
	75	2238	2273.6	2379.6	2279.2	2268.2	2322.5	2293.52	1751	1792.2	1923.8	1788.6	1769.4	1828.67	1808.94	1740.6	1776.4	1899.6	1749.6	1713.8	1776	1776
	80	2369.2	2432.2	2505.8	2404.4	2365.8	2417.5	2415.82	1914.4	1993.6	2089.2	1954.8	1901.2	1963	1969.37	1914.8	1979.8	2075.2	1921.4	1858	1924	1945.53
	85	2633.2	2709.4	2826.4	2622.2	2526	2654.83	2662.01	2243.2	2344.4	2507.2	2244.4	2119	2298	2292.7	2250.8	2335.4	2481.2	2210.4	2094.8	2233.67	2267.71
	90	3109.8	3229.8	3405	3111.8	2936.8	3114.17	3151.23	2833.8	3002.8	3262	2893.6	2675	2948.33	2935.92	2843.6	3002.6	3244.8	2844.4	2645.6	2866	2907.83
	95	3956	4164.6	4178.2	3882.4	3812.2	3811.17	3967.43	3894.4	4191.4	4264	3908.2	3861.4	3930.67	4008.34	3856.8	4113.4	4187.4	3805.4	3770	3780	3918.83
		SZA	23.22	26.41	24.48	22.54	27.86	Group 1	23	27.37	24.11	22.01	22.6	Group 2	23.4	27.44	26.48	22.59	25.75	Group 3	21.84	24.18	26.9	21.78	23.64	Group 4	23.33	21.94	26.17	28.03	25.31	Group 5	24.23	25.39	22.27	21.76	22.09	23.94	Group 6
		Atm-I	890	891	892	893	898	892.8	903	904	908	912	916	908.6	932	934	937	942	944	937.8	945	950	951	954	957	951.4	959	962	973	974	982	970	994	995	996	1009	1018	1062	1012.33
		SENSOR	L8	L8	L8	L8	L8	Averages	L8	L8	L8	L8	L9	Averages	L9	L9	L9	L8	L8	Averages	L9	L9	L8	L8	L8	Averages	L8	L8	L8	L8	L8	Averages	L8	L9	L8	L8	L8	L8	Averages
		TOA	07-09-22	08-02-19	07-19-20	07-01-19	08-10-22		07-06-21	08-07-21	07-17-19	06-23-22	07-01-22		07-10-22	08-11-22	08-02-22	07-02-22	07-28-20		06-15-22	07-17-22	08-04-20	06-13-21	07-12-20		07-10-19	06-20-21	07-31-21	08-11-19	07-26-19		07-18-22	07-26-22	06-26-20	06-16-22	06-24-19	07-15-21
		1	1133	1112	1132	1145	1118	1128	1152	1133	1173	1153	1176	1157.4	1190	1175	1204	1197	1214	1196	1246	1208	1233	1218	1239	1228.8	1238	1233	1250	1237	1268	1245.2	1282	1298	1314	1344	1362	1391	1331.83
		3	1181	1170	1181	1212	1180	1184.8	1208	1182	1229	1202	1232	1210.6	1246	1225	1250	1257	1263	1248.2	1296	1254	1284	1271	1293	1279.6	1288	1275	1303	1278	1314	1291.6	1334	1338	1366	1384	1415	1426	1377.17
		5	1219	1203	1224	1248	1219	1222.6	1248	1222	1259	1244	1272	1249	1285	1265	1287	1292	1302	1286.2	1328	1289	1321	1312	1323	1314.6	1331	1311	1344	1316	1353	1331	1375	1376	1408	1416	1446	1459	1413.33
		10	1312	1276	1306	1325	1299	1303.6	1330	1303	1334	1338	1360	1333	1383	1342	1366	1382	1376	1369.8	1413	1370	1385	1409	1399	1395.2	1406	1389	1421	1394	1409	1403.8	1453	1457	1481	1498	1514	1507	1485
		15	1378	1346	1368	1399	1372	1372.6	1394	1370	1400	1409	1430	1400.6	1459	1408	1431	1459	1445	1440.4	1478	1437	1434	1474	1469	1458.4	1477	1438	1485	1453	1489	1468.4	1516	1521	1536	1557	1578	1548	1542.67
		20	1454	1401	1427	1454	1431	1433.4	1445	1426	1454	1477	1492	1458.8	1526	1476	1483	1530	1511	1505.2	1539	1493	1483	1536	1534	1517	1550	1494	1551	1504	1542	1528.2	1576	1579	1588	1620	1632	1582	1596.17
		25	1519	1446	1482	1506	1492	1489	1503	1491	1501	1545	1553	1518.6	1593	1550	1544	1603	1566	1571.2	1601	1560	1525	1597	1588	1574.2	1598	1544	1603	1561	1586	1578.4	1643	1630	1647	1683	1694	1624	1653.5
		30	1587	1497	1542	1559	1558	1548.6	1560	1560	1555	1609	1626	1582	1667	1607	1606	1675	1621	1635.2	1664	1622	1572	1672	1649	1635.8	1650	1604	1673	1615	1637	1635.8	1699	1690	1700	1741	1748	1664	1707
		35	1652	1551	1590	1624	1618	1607	1618	1620	1611	1686	1684	1643.8	1739	1679	1676	1756	1672	1704.4	1732	1674	1615	1730	1717	1693.6	1707	1660	1735	1664	1694	1692	1755	1757	1757	1811	1804	1702	1764.33
		40	1731	1614	1654	1706	1690	1679	1689	1680	1662	1761	1764	1711.2	1820	1760	1742	1838	1734	1778.8	1797	1748	1662	1816	1777	1760	1784	1717	1803	1731	1751	1757.2	1829	1823	1811	1875	1870	1746	1825.67
		45	1807	1685	1718	1784	1770	1752.8	1753	1751	1737	1848	1846	1787	1894	1845	1815	1922	1808	1856.8	1866	1815	1714	1894	1850	1827.8	1853	1782	1881	1779	1816	1822.2	1893	1889	1876	1952	1930	1785	1887.5
		50	1893	1744	1790	1860	1843	1826	1829	1829	1800	1936	1916	1862	1976	1921	1885	2007	1877	1933.2	1935	1888	1769	1968	1919	1895.8	1920	1854	1963	1841	1883	1892.2	1967	1955	1945	2025	1998	1835	1954.17
		55	1984	1810	1859	1925	1933	1902.2	1897	1912	1868	2014	2008	1939.8	2075	2008	1969	2108	1950	2022	2014	1963	1823	2058	2003	1972.2	1999	1924	2030	1908	1947	1961.6	2049	2029	2021	2108	2074	1883	2027.33
		60	2065	1884	1947	2006	2017	1983.8	1960	1997	1932	2102	2100	2018.2	2173	2119	2049	2212	2025	2115.6	2101	2047	1881	2138	2078	2049	2083	2001	2120	1977	2025	2041.2	2136	2103	2091	2184	2138	1937	2098.17
		65	2166	1949	2024	2098	2105	2068.4	2024	2087	2009	2182	2166	2093.6	2259	2198	2125	2305	2101	2197.6	2172	2116	1939	2221	2166	2122.8	2155	2063	2226	2057	2108	2121.8	2214	2170	2176	2264	2230	1989	2173.83
		70	2257	2024	2095	2170	2183	2145.8	2104	2168	2080	2284	2260	2179.2	2353	2290	2211	2402	2168	2284.8	2267	2201	1992	2289	2230	2195.8	2239	2126	2302	2113	2170	2190	2294	2260	2237	2356	2293	2051	2248.5
		75	2370	2101	2165	2257	2297	2238	2186	2261	2148	2396	2377	2273.6	2451	2389	2303	2508	2247	2379.6	2366	2296	2059	2375	2300	2279.2	2308	2216	2385	2192	2240	2268.2	2384	2336	2303	2451	2355	2106	2322.5
		80	2571	2201	2283	2361	2430	2369.2	2301	2366	2260	2645	2589	2432.2	2602	2517	2424	2644	2342	2505.8	2559	2447	2145	2465	2406	2404.4	2404	2334	2497	2276	2318	2365.8	2490	2441	2396	2563	2450	2165	2417.5
		85	3006	2373	2484	2538	2765	2633.2	2558	2616	2412	3000	2961	2709.4	2990	2860	2757	3059	2466	2826.4	2887	2753	2298	2642	2531	2622.2	2564	2541	2672	2414	2439	2526	2822	2775	2526	2919	2590	2297	2654.83
		90	3613	2793	2869	2956	3318	3109.8	2990	3072	2856	3661	3570	3229.8	3653	3467	3299	3743	2863	3405	3533	3295	2631	3157	2943	3111.8	2932	2923	3183	2804	2842	2936.8	3379	3271	2933	3571	2981	2550	3114.17
		95	4430	3810	3714	3738	4088	3956	3755	4007	3902	4683	4476	4164.6	4437	4173	4062	4546	3673	4178.2	4285	4063	3335	3916	3813	3882.4	3900	3697	3975	3707	3782	3812.2	4070	3909	3845	4273	3676	3094	3811.17
		CMAC	07-09-22	08-02-19	07-19-20	07-01-19	08-10-22		07-06-21	08-07-21	07-17-19	06-23-22	07-01-22		07-10-22	08-11-22	08-02-22	07-02-22	07-28-20		06-15-22	07-17-22	08-04-20	06-13-21	07-12-20		07-10-19	06-20-21	07-31-21	08-11-19	07-26-19		07-18-22	07-26-22	06-26-20	06-16-22	06-24-19	07-15-21
		1	376	360	377	396	351	372	381	360	405	367	391	380.8	371	356	392	381	396	379.2	432	372	394	385	400	396.6	404	375	387	367	392	385	399	410	437	449	463	423	430.167
		3	433	421	439	473	427	438.6	448	417	467	431	470	446.6	455	425	449	448	455	446.4	490	441	469	447	473	464	463	429	461	431	456	448	468	463	501	505	526	478	490.167
		5	492	471	491	520	469	488.6	496	472	514	477	515	494.8	509	474	497	501	506	497.4	541	480	513	502	510	509.2	524	483	508	475	514	500.8	523	520	560	553	585	513	542.333
		10	598	559	597	615	573	588.4	597	572	607	604	630	602	633	573	603	617	607	606.6	644	590	594	629	614	614.2	626	590	612	580	589	599.4	630	635	657	669	682	593	644.333
		15	685	647	677	708	658	675	685	657	688	693	718	688.2	730	665	692	718	701	701.2	735	678	662	720	706	700.2	715	659	705	662	692	686.6	720	720	739	748	768	653	724.667
		20	772	717	747	778	741	751	747	726	759	773	798	760.6	821	748	761	808	786	784.8	814	746	729	797	794	776	818	732	794	738	767	769.8	803	799	814	843	855	707	803.5
		25	862	772	813	841	819	821.4	823	807	817	864	878	837.8	906	841	840	903	855	869	895	838	788	879	869	853.8	883	800	865	806	830	836.8	893	871	896	929	936	764	881.5
		30	940	834	890	909	895	893.6	893	895	884	950	968	918	996	922	918	999	929	952.8	976	922	847	982	945	934.4	947	880	957	883	897	912.8	969	955	970	1013	1011	829	957.833
		35	1024	906	947	989	973	967.8	966	969	956	1047	1039	995.4	1099	1012	1005	1106	995	1043.4	1071	990	903	1058	1033	1011	1022	953	1045	949	978	989.4	1051	1050	1045	1110	1092	884	1038.67
		40	1120	974	1024	1092	1064	1054.8	1055	1045	1025	1143	1144	1082.4	1203	1119	1093	1215	1077	1141.4	1158	1086	969	1171	1119	1100.6	1129	1031	1135	1037	1054	1077.2	1154	1147	1124	1200	1178	950	1125.5
		45	1215	1063	1107	1187	1167	1147.8	1134	1138	1114	1250	1246	1176.4	1300	1229	1186	1322	1172	1241.8	1249	1178	1034	1276	1217	1190.8	1221	1118	1243	1104	1144	1166	1240	1236	1212	1315	1275	1011	1214.83
		50	1326	1144	1195	1281	1253	1239.8	1232	1236	1198	1363	1339	1273.6	1406	1328	1282	1434	1266	1343.2	1338	1274	1111	1373	1308	1280.8	1309	1216	1355	1192	1238	1262	1341	1324	1313	1413	1366	1083	1306.67
		55	1437	1225	1281	1363	1368	1334.8	1320	1338	1281	1459	1456	1370.8	1534	1441	1391	1569	1359	1458.8	1444	1376	1180	1497	1420	1383.4	1418	1306	1448	1284	1326	1356.4	1458	1428	1415	1530	1478	1160	1411.5
		60	1537	1314	1392	1462	1475	1436	1402	1444	1363	1570	1569	1469.6	1657	1586	1491	1704	1461	1579.8	1557	1481	1257	1600	1517	1482.4	1531	1414	1569	1374	1433	1464.2	1580	1531	1516	1637	1571	1234	1511.5
		65	1662	1392	1486	1579	1583	1540.4	1478	1558	1459	1673	1653	1564.2	1767	1689	1591	1826	1559	1686.4	1650	1576	1336	1713	1638	1582.6	1622	1496	1709	1481	1547	1571	1687	1624	1633	1749	1697	1315	1617.5
		70	1773	1484	1572	1667	1680	1635.2	1579	1661	1546	1805	1775	1673.2	1891	1807	1703	1953	1644	1799.6	1774	1686	1406	1802	1724	1678.4	1735	1579	1813	1558	1631	1663.2	1799	1749	1716	1879	1790	1405	1723
		75	1915	1583	1661	1774	1822	1751	1681	1776	1634	1947	1923	1792.2	2017	1937	1824	2092	1749	1923.8	1904	1812	1494	1916	1817	1788.6	1827	1702	1927	1664	1727	1769.4	1923	1857	1811	2015	1878	1488	1828.67
		80	2168	1705	1807	1903	1989	1914.4	1827	1909	1775	2266	2191	1993.6	2216	2103	1982	2271	1874	2089.2	2160	2012	1609	2036	1957	1954.8	1954	1859	2080	1780	1833	1901.2	2071	2003	1939	2174	2012	1579	1963
		85	2708	1918	2056	2124	2410	2243.2	2150	2226	1967	2718	2661	2344.4	2714	2552	2417	2816	2037	2507.2	2594	2417	1814	2272	2125	2244.4	2168	2139	2320	1967	2001	2119	2532	2469	2119	2676	2212	1780	2298
		90	3451	2436	2533	2648	3101	2833.8	2696	2797	2528	3550	3443	3002.8	3572	3339	3122	3714	2563	3262	3446	3133	2257	2959	2673	2893.6	2656	2653	3012	2499	2555	2675	3308	3158	2695	3602	2770	2157	2948.33
		95	4482	3713	3578	3613	4086	3894.4	3654	3984	3849	4868	4602	4191.4	4574	4264	4101	4766	3615	4264	4406	4146	3190	3967	3832	3908.2	3957	3691	4082	3727	3850	3861.4	4254	4051	3962	4571	3771	2975	3930.67
		LaSRC	07-09-22	08-02-19	07-19-20	07-01-19	08-10-22		07-06-21	08-07-21	07-17-19	06-23-22	07-01-22		07-10-22	08-11-22	08-02-22	07-02-22	07-28-20		06-15-22	07-17-22	08-04-20	06-13-21	07-12-20		07-10-19	06-20-21	07-31-21	08-11-19	07-26-19		07-18-22	07-26-22	06-26-20	06-16-22	06-24-19	07-15-21
		1	233	332	332	331	278	301.2	303	212	377	247	374	302.6	283	320	369	261	329	312.4	421	349	432	323	380	381	231	352	232	346	341	300.4	338	396	403	267	375	508	381.167
		3	374	432	425	449	382	412.4	407	357	474	406	495	427.8	435	412	469	400	450	433.2	521	445	507	453	465	478.2	381	453	350	438	450	414.4	457	514	508	462	480	588	501.5
		5	441	490	480	506	455	474.4	481	437	529	480	550	495.4	512	485	520	484	527	505.6	578	517	556	517	505	534.6	464	499	440	499	507	481.8	521	566	559	557	529	636	561.333
		10	561	602	572	621	567	584.6	577	556	620	618	655	605.2	621	593	611	605	618	609.6	683	617	634	628	609	634.2	594	606	562	586	604	590.4	628	678	667	675	645	715	668
		15	668	683	653	709	649	672.4	669	636	690	694	741	686	718	669	699	696	695	695.4	770	696	703	709	693	714.2	680	689	650	671	690	676	725	766	745	753	736	774	749.833
		20	762	737	720	778	740	747.4	759	702	751	778	823	762.6	809	762	780	786	782	783.8	838	763	760	803	768	786.4	765	762	750	748	768	758.6	793	828	822	827	811	828	818.167
		25	841	797	801	840	806	817	826	785	819	859	900	837.8	884	854	845	885	860	865.6	916	848	827	878	855	864.8	843	826	824	816	833	828.4	865	901	903	908	888	876	890.167
		30	923	861	862	907	890	888.6	900	871	888	950	978	917.4	982	929	924	961	924	944	992	930	881	958	929	938	922	896	919	891	891	903.8	943	976	975	987	962	935	963
		35	1000	937	940	997	960	966.8	986	955	961	1057	1066	1005	1086	1006	1003	1057	995	1029.4	1082	1012	939	1051	997	1016.2	994	961	1010	958	981	980.8	1029	1067	1045	1088	1039	987	1042.5
		40	1102	1010	1017	1076	1043	1049.6	1055	1043	1032	1148	1147	1085	1188	1110	1098	1158	1081	1127	1159	1098	1003	1150	1084	1098.8	1095	1052	1093	1041	1068	1069.8	1130	1152	1127	1173	1122	1054	1126.33
		45	1203	1086	1088	1188	1154	1143.8	1143	1136	1112	1247	1235	1174.6	1271	1212	1183	1275	1159	1220	1242	1184	1068	1241	1172	1181.4	1188	1129	1185	1113	1142	1151.4	1219	1232	1198	1267	1213	1116	1207.5
		50	1298	1170	1167	1269	1238	1228.4	1221	1224	1175	1343	1338	1260.2	1374	1310	1279	1366	1244	1314.6	1324	1266	1131	1331	1261	1262.6	1274	1220	1280	1181	1212	1233.4	1308	1318	1272	1371	1294	1171	1289
		55	1420	1247	1250	1370	1320	1321.4	1296	1327	1253	1447	1445	1353.6	1484	1419	1375	1476	1324	1415.6	1426	1360	1197	1428	1370	1356.2	1365	1310	1372	1261	1288	1319.2	1406	1409	1356	1475	1393	1241	1380
		60	1513	1319	1342	1453	1430	1411.4	1372	1423	1345	1554	1549	1448.6	1604	1548	1469	1613	1420	1530.8	1524	1446	1263	1555	1473	1452.2	1474	1382	1470	1359	1386	1414.2	1526	1508	1466	1579	1484	1308	1478.5
		65	1635	1385	1430	1539	1554	1508.6	1453	1500	1434	1659	1647	1538.6	1724	1681	1577	1733	1513	1645.6	1618	1551	1328	1644	1564	1541	1573	1471	1609	1449	1500	1520.4	1618	1604	1575	1677	1571	1387	1572
		70	1751	1464	1527	1653	1661	1611.2	1556	1629	1526	1772	1771	1650.8	1838	1804	1695	1855	1610	1760.4	1735	1654	1389	1751	1651	1636	1658	1556	1727	1528	1596	1613	1728	1704	1652	1811	1666	1453	1669
		75	1891	1593	1643	1757	1819	1740.6	1667	1746	1608	1934	1927	1776.4	1983	1936	1842	2029	1708	1899.6	1877	1784	1493	1860	1734	1749.6	1756	1685	1830	1623	1675	1713.8	1862	1817	1749	1944	1760	1524	1776
		80	2176	1722	1782	1900	1994	1914.8	1815	1887	1768	2239	2190	1979.8	2192	2120	1984	2244	1836	2075.2	2135	2006	1607	1990	1869	1921.4	1890	1842	1990	1758	1810	1858	2032	1998	1898	2132	1867	1617	1924
		85	2707	1959	2024	2133	2431	2250.8	2164	2169	1962	2725	2657	2335.4	2665	2549	2388	2798	2006	2481.2	2556	2402	1785	2229	2080	2210.4	2094	2133	2291	1962	1994	2094.8	2465	2436	2071	2573	2063	1794	2233.67
		90	3458	2452	2531	2660	3117	2843.6	2701	2820	2546	3536	3410	3002.6	3561	3315	3084	3694	2570	3244.8	3354	3075	2236	2930	2627	2844.4	2645	2597	2981	2484	2521	2645.6	3226	3091	2624	3487	2639	2129	2866
		95	4417	3663	3583	3604	4017	3856.8	3641	3939	3790	4730	4467	4113.4	4510	4152	4000	4686	3589	4187.4	4265	4015	3120	3869	3758	3805.4	3906	3555	4018	3637	3734	3770	4103	3913	3827	4351	3630	2856	3780

## Sheet: B3 CDF
		Data Excerpted from Groups, this page.					Averages (n=5) to control uncertainty, n=6 for Group 6.
			TOA Reflectance					TOAR	CMAC						CMAC	LaSRC						LaSRC
		1	2	3	4	5	6	Overall	1	2	3	4	5	6	Overall	1	2	3	4	5	6	Overall
	Percentile	892.8	908.6	937.8	951.4	970	1012.33	Avgs	892.8	908.6	937.8	951.4	970	1012.33	Avgs	892.8	908.6	937.8	951.4	970	1012.33	Avgs
	1	962.6	993.4	1028	1063	1060.6	1156.67	1044.04	587.4	598.2	607.4	627.4	600	666.5	614.483	619.2	620.4	648	698.8	666.2	761.167	668.961
	3	1031.8	1065.2	1098.6	1132.2	1121	1216.67	1110.91	664.4	686.8	690.6	713.6	676.8	745.333	696.256	703	727.6	757.2	796.2	752.2	852.833	764.839
	5	1079.4	1109.4	1143	1174.4	1166.4	1254.17	1154.46	723.4	739.4	746.6	766	731.8	791.833	749.839	765.6	788.4	817.4	850.2	815.2	909.833	824.439
	10	1170.2	1204.2	1236.4	1261.2	1251.4	1335.83	1243.21	829.4	854.8	859.2	873.8	841.8	904.167	860.528	878.2	908.6	931.2	958.8	922.4	1018.5	936.283
	15	1249.8	1284.4	1318.6	1342.6	1330.2	1408.17	1322.29	925.6	948.6	963.6	975.8	942	998.833	959.072	974.2	1004.2	1033.6	1051.6	1022.6	1110.67	1032.81
	20	1325	1353	1398	1410.8	1399.6	1471.17	1392.93	1010.8	1031.6	1062.2	1062.2	1032	1083.17	1046.99	1064	1087.8	1122	1140.2	1110.4	1191.83	1119.37
	25	1393.6	1424.8	1469.6	1473.6	1464	1538.17	1460.63	1094	1118.4	1147.8	1140.2	1113.6	1171.83	1130.97	1138.8	1170.8	1212	1215.4	1190.2	1273	1200.03
	30	1458	1497.2	1544.2	1540	1523.2	1601.33	1527.32	1171	1204	1241.2	1226.2	1188.4	1255.17	1214.33	1217.6	1256.6	1304.2	1292.4	1266.4	1354.17	1281.89
	35	1524.2	1570.2	1621	1610.4	1587.8	1668.33	1596.99	1249.4	1292.2	1336.4	1313.4	1271.8	1345.83	1301.51	1303.6	1343.8	1403.2	1381	1348.4	1437.5	1369.58
	40	1610.6	1649.2	1706.8	1688.4	1671	1737.17	1677.19	1350	1388.6	1442.4	1411.2	1378.4	1436.67	1401.21	1400.4	1442.6	1506.2	1474.2	1452	1527	1467.07
	45	1698.8	1730.6	1795.8	1765.8	1748.6	1812	1758.6	1454.6	1485.6	1552.6	1508.2	1476.8	1538.17	1502.66	1503.4	1539.6	1613.2	1569.2	1547.6	1617.33	1565.06
	50	1784.4	1815.4	1883.8	1845.4	1825.2	1886.33	1840.09	1556	1587	1660.6	1608	1575	1635.83	1603.74	1609.4	1637.2	1717.2	1666.4	1638.2	1714.67	1663.84
	55	1873.2	1908.8	1985.2	1932	1912	1973.67	1930.81	1660.4	1700	1786	1716.6	1686.6	1752.33	1716.99	1712	1748.6	1837.4	1771.4	1746.2	1822.5	1773.02
	60	1967	2007.2	2096.4	2028.2	1999.8	2061.33	2026.66	1771.2	1817.4	1923.6	1837	1798	1869.33	1836.09	1824.4	1866	1970	1885.8	1852.8	1930.17	1888.19
	65	2058.8	2095.4	2194.2	2117.6	2092.6	2151.83	2118.41	1878.8	1923	2043.6	1949.4	1916.2	1989.33	1950.06	1926.4	1970.2	2097	1990	1966	2039.83	1998.24
	70	2146.4	2192.2	2292.8	2200.6	2170	2236.5	2206.42	1983.6	2039.2	2166.2	2053.2	2015.8	2101.33	2059.89	2034.8	2083.8	2213.6	2090.2	2057.2	2145	2104.1
	75	2257.8	2303.4	2391.2	2295.6	2256.2	2318.17	2303.73	2115	2174.6	2288.2	2173.6	2126.4	2211.5	2181.55	2169.8	2220.2	2341.4	2208.2	2164.4	2247.5	2225.25
	80	2415.2	2487.8	2536	2437.8	2367.4	2436.33	2446.76	2301.8	2395.8	2468.2	2352.2	2269.6	2368	2359.27	2356	2438.2	2520.4	2380.6	2307.4	2390	2398.77
	85	2732.8	2816	2903.2	2712.6	2554.4	2697.33	2736.06	2676.8	2790.2	2922.6	2698.2	2507.4	2718.17	2718.89	2735	2827.8	2964.8	2712.8	2539.6	2713.33	2748.89
	90	3309	3445	3609	3265.6	3040.2	3258.17	3321.16	3355.4	3546.6	3792.6	3388.4	3131.6	3460.67	3445.88	3409.8	3567	3787.2	3362	3131.2	3406	3443.87
	95	4211.6	4467.8	4478.4	4148.2	4036	4072	4235.67	4430.6	4762.6	4866	4489.6	4407.6	4545.67	4583.68	4438.8	4718.4	4785.8	4391.4	4312	4370.17	4502.76
		SZA	23.22	26.41	24.48	22.54	27.86	Group 1	23	27.37	24.11	22.01	22.6	Group 2	23.4	27.44	26.48	22.59	25.75	Group 3	21.84	24.18	26.9	21.78	23.64	Group 4	23.33	21.94	26.17	28.03	25.31	Group 5	24.23	25.39	22.27	21.76	22.09	23.94	Group 6
		Atm-I	890	891	892	893	898	892.8	903	904	908	912	916	908.6	932	934	937	942	944	937.8	945	950	951	954	957	951.4	959	962	973	974	982	970	994	995	996	1009	1018	1062	1012.33
		SENSOR	L8	L8	L8	L8	L8	Averages	L8	L8	L8	L8	L9	Averages	L9	L9	L9	L8	L8	Averages	L9	L9	L8	L8	L8	Averages	L8	L8	L8	L8	L8	Averages	L8	L9	L8	L8	L8	L8	Averages
		TOA	07-09-22	08-02-19	07-19-20	07-01-19	08-10-22		07-06-21	08-07-21	07-17-19	06-23-22	07-01-22		07-10-22	08-11-22	08-02-22	07-02-22	07-28-20		06-15-22	07-17-22	08-04-20	06-13-21	07-12-20		07-10-19	06-20-21	07-31-21	08-11-19	07-26-19		07-18-22	07-26-22	06-26-20	06-16-22	06-24-19	07-15-21
		1	959	949	960	999	946	962.6	993	961	1001	989	1023	993.4	1032	988	1032	1042	1046	1028	1099	1031	1056	1063	1066	1063	1073	1044	1069	1039	1078	1060.6	1108	1124	1153	1178	1184	1193	1156.67
		3	1037	1011	1021	1061	1029	1031.8	1067	1026	1076	1068	1089	1065.2	1099	1057	1101	1118	1118	1098.6	1161	1097	1135	1127	1141	1132.2	1133	1116	1122	1102	1132	1121	1184	1188	1196	1243	1238	1251	1216.67
		5	1087	1060	1073	1107	1070	1079.4	1110	1070	1121	1112	1134	1109.4	1156	1103	1136	1168	1152	1143	1200	1143	1164	1179	1186	1174.4	1176	1153	1179	1147	1177	1166.4	1214	1228	1232	1284	1280	1287	1254.17
		10	1178	1146	1179	1200	1148	1170.2	1191	1179	1204	1211	1236	1204.2	1252	1201	1221	1261	1247	1236.4	1288	1239	1232	1269	1278	1261.2	1258	1227	1270	1244	1258	1251.4	1295	1305	1335	1367	1367	1346	1335.83
		15	1263	1227	1248	1281	1230	1249.8	1275	1252	1274	1304	1317	1284.4	1337	1276	1295	1356	1329	1318.6	1366	1316	1303	1364	1364	1342.6	1348	1310	1349	1314	1330	1330.2	1371	1386	1404	1445	1443	1400	1408.17
		20	1352	1286	1327	1346	1314	1325	1341	1314	1342	1376	1392	1353	1422	1365	1368	1436	1399	1398	1440	1385	1357	1439	1433	1410.8	1423	1375	1421	1383	1396	1399.6	1450	1451	1468	1505	1509	1444	1471.17
		25	1426	1353	1381	1411	1397	1393.6	1414	1382	1403	1455	1470	1424.8	1498	1440	1442	1510	1458	1469.6	1511	1449	1411	1504	1493	1473.6	1499	1427	1494	1438	1462	1464	1517	1519	1534	1591	1572	1496	1538.17
		30	1499	1409	1441	1484	1457	1458	1477	1466	1469	1524	1550	1497.2	1578	1516	1513	1597	1517	1544.2	1591	1516	1464	1572	1557	1540	1566	1485	1558	1493	1514	1523.2	1588	1581	1598	1662	1634	1545	1601.33
		35	1567	1477	1509	1547	1521	1524.2	1542	1541	1531	1613	1624	1570.2	1659	1589	1579	1685	1593	1621	1659	1598	1513	1652	1630	1610.4	1622	1555	1628	1556	1578	1587.8	1674	1661	1659	1729	1699	1588	1668.33
		40	1674	1546	1588	1629	1616	1610.6	1623	1607	1602	1698	1716	1649.2	1742	1679	1672	1771	1670	1706.8	1737	1680	1575	1739	1711	1688.4	1697	1634	1716	1635	1673	1671	1742	1738	1729	1794	1779	1641	1737.17
		45	1776	1617	1670	1725	1706	1698.8	1698	1690	1668	1792	1805	1730.6	1830	1784	1757	1866	1742	1795.8	1825	1751	1645	1830	1778	1765.8	1781	1713	1801	1705	1743	1748.6	1820	1808	1802	1889	1849	1704	1812
		50	1873	1688	1752	1811	1798	1784.4	1782	1777	1738	1879	1901	1815.4	1926	1864	1840	1960	1829	1883.8	1907	1835	1707	1919	1859	1845.4	1869	1802	1887	1765	1803	1825.2	1909	1883	1871	1966	1926	1763	1886.33
		55	1971	1775	1827	1893	1900	1873.2	1865	1868	1827	1986	1998	1908.8	2050	1969	1930	2061	1916	1985.2	2002	1920	1768	2019	1951	1932	1955	1889	1984	1843	1889	1912	2014	1971	1964	2057	2009	1827	1973.67
		60	2064	1859	1930	1995	1987	1967	1949	1985	1905	2089	2108	2007.2	2157	2082	2034	2197	2012	2096.4	2105	2019	1842	2121	2054	2028.2	2040	1961	2094	1926	1978	1999.8	2103	2067	2049	2169	2087	1893	2061.33
		65	2163	1948	2002	2085	2096	2058.8	2033	2083	1990	2185	2186	2095.4	2263	2196	2123	2302	2087	2194.2	2183	2113	1911	2227	2154	2117.6	2140	2037	2203	2016	2067	2092.6	2202	2158	2137	2264	2190	1960	2151.83
		70	2267	2026	2085	2161	2193	2146.4	2124	2176	2078	2285	2298	2192.2	2369	2295	2222	2420	2158	2292.8	2290	2206	1977	2297	2233	2200.6	2213	2123	2285	2094	2135	2170	2287	2262	2211	2366	2268	2025	2236.5
		75	2406	2106	2195	2287	2295	2257.8	2214	2283	2167	2427	2426	2303.4	2474	2385	2328	2519	2250	2391.2	2406	2323	2054	2384	2311	2295.6	2305	2213	2390	2162	2211	2256.2	2377	2340	2298	2458	2340	2096	2318.17
		80	2667	2226	2310	2409	2464	2415.2	2377	2402	2290	2692	2678	2487.8	2629	2530	2492	2688	2341	2536	2626	2486	2159	2499	2419	2437.8	2406	2359	2479	2283	2310	2367.4	2529	2486	2387	2612	2435	2169	2436.33
		85	3168	2442	2517	2642	2895	2732.8	2688	2679	2469	3126	3118	2816	3088	2918	2855	3127	2528	2903.2	3044	2889	2341	2703	2586	2712.6	2566	2620	2700	2425	2461	2554.4	2894	2808	2564	2988	2591	2339	2697.33
		90	3902	2910	3041	3117	3575	3309	3178	3247	2983	3970	3847	3445	3908	3666	3542	3957	2972	3609	3787	3567	2760	3194	3020	3265.6	3074	3083	3248	2861	2935	3040.2	3622	3497	2993	3762	3002	2673	3258.17
		95	4738	4056	4031	3858	4375	4211.6	4114	4345	4124	4909	4847	4467.8	4748	4444	4370	4851	3979	4478.4	4598	4362	3588	4125	4068	4148.2	4049	4008	4184	3972	3967	4036	4363	4200	4108	4529	3853	3379	4072
		CMAC	07-09-22	08-02-19	07-19-20	07-01-19	08-10-22		07-06-21	08-07-21	07-17-19	06-23-22	07-01-22		07-10-22	08-11-22	08-02-22	07-02-22	07-28-20		06-15-22	07-17-22	08-04-20	06-13-21	07-12-20		07-10-19	06-20-21	07-31-21	08-11-19	07-26-19		07-18-22	07-26-22	06-26-20	06-16-22	06-24-19	07-15-21
		1	588	572	589	629	559	587.4	600	569	613	582	627	598.2	627	554	615	619	622	607.4	688	591	616	622	620	627.4	635	583	605	576	601	600	624	650	681	704	692	648	666.5
		3	668	640	657	704	653	664.4	694	648	701	684	707	686.8	692	650	695	711	705	690.6	757	673	716	703	719	713.6	705	672	679	654	674	676.8	727	731	741	786	761	726	745.333
		5	733	701	720	756	707	723.4	747	697	756	736	761	739.4	772	704	736	769	752	746.6	805	735	749	768	773	766	755	720	745	709	730	731.8	767	775	786	837	817	769	791.833
		10	839	806	839	865	798	829.4	842	830	853	859	890	854.8	885	823	839	885	864	859.2	914	850	833	881	891	873.8	866	819	855	830	839	841.8	874	887	917	950	940	857	904.167
		15	942	899	926	962	899	925.6	938	916	939	968	982	948.6	992	916	934	1005	971	963.6	1011	944	923	1001	1000	975.8	976	925	962	919	928	942	971	984	1011	1052	1042	933	998.833
		20	1041	971	1017	1035	990	1010.8	1020	987	1022	1055	1074	1031.6	1099	1026	1024	1104	1058	1062.2	1103	1036	991	1096	1085	1062.2	1075	1004	1057	1006	1018	1032	1074	1073	1095	1136	1127	994	1083.17
		25	1132	1051	1082	1115	1090	1094	1106	1070	1095	1153	1168	1118.4	1186	1115	1113	1195	1130	1147.8	1193	1112	1058	1179	1159	1140.2	1167	1074	1148	1081	1098	1113.6	1160	1161	1181	1246	1217	1066	1171.83
		30	1220	1115	1154	1201	1165	1171	1184	1168	1172	1230	1266	1204	1288	1208	1203	1302	1205	1241.2	1296	1197	1131	1264	1243	1226.2	1252	1146	1231	1145	1168	1188.4	1256	1244	1260	1341	1295	1135	1255.17
		35	1301	1195	1232	1279	1240	1249.4	1261	1260	1249	1338	1353	1292.2	1385	1299	1287	1414	1297	1336.4	1378	1303	1188	1363	1335	1313.4	1324	1236	1319	1228	1252	1271.8	1366	1349	1345	1432	1385	1198	1345.83
		40	1425	1277	1325	1373	1350	1350	1359	1339	1332	1447	1466	1388.6	1492	1407	1400	1521	1392	1442.4	1475	1404	1266	1473	1438	1411.2	1419	1335	1435	1331	1372	1378.4	1455	1449	1439	1518	1488	1271	1436.67
		45	1547	1360	1422	1484	1460	1454.6	1450	1437	1412	1557	1572	1485.6	1597	1538	1508	1635	1485	1552.6	1585	1494	1353	1586	1523	1508.2	1525	1435	1542	1419	1463	1476.8	1557	1541	1534	1644	1588	1365	1538.17
		50	1661	1444	1518	1588	1569	1556	1547	1542	1496	1661	1689	1587	1716	1637	1606	1752	1592	1660.6	1688	1596	1434	1699	1623	1608	1635	1550	1650	1498	1542	1575	1674	1641	1627	1746	1687	1440	1635.83
		55	1775	1546	1606	1684	1691	1660.4	1647	1653	1603	1791	1806	1700	1867	1766	1719	1879	1699	1786	1805	1702	1511	1826	1739	1716.6	1745	1660	1779	1596	1653	1686.6	1814	1757	1747	1866	1800	1530	1752.33
		60	1886	1644	1728	1804	1794	1771.2	1748	1791	1695	1915	1938	1817.4	1997	1906	1847	2049	1819	1923.6	1934	1826	1602	1954	1869	1837	1851	1750	1918	1703	1768	1798	1929	1881	1859	2015	1905	1627	1869.33
		65	2001	1748	1812	1910	1923	1878.8	1848	1908	1796	2030	2033	1923	2127	2045	1956	2178	1912	2043.6	2032	1944	1690	2086	1995	1949.4	1978	1846	2058	1817	1882	1916.2	2058	2001	1973	2142	2043	1719	1989.33
		70	2129	1841	1910	2000	2038	1983.6	1957	2018	1902	2152	2167	2039.2	2258	2169	2079	2325	2000	2166.2	2162	2060	1773	2176	2095	2053.2	2069	1956	2164	1919	1971	2015.8	2166	2136	2070	2279	2148	1809	2101.33
		75	2290	1935	2039	2150	2161	2115	2066	2148	2009	2326	2324	2174.6	2388	2280	2209	2448	2116	2288.2	2312	2208	1870	2284	2194	2173.6	2188	2071	2298	2006	2069	2126.4	2288	2240	2186	2399	2246	1910	2211.5
		80	2604	2077	2176	2292	2360	2301.8	2260	2291	2156	2648	2624	2395.8	2581	2458	2414	2661	2227	2468.2	2587	2413	2002	2429	2330	2352.2	2316	2257	2415	2162	2198	2269.6	2487	2432	2302	2602	2372	2013	2368
		85	3190	2331	2420	2568	2875	2676.8	2633	2620	2373	3164	3161	2790.2	3139	2938	2866	3212	2458	2922.6	3114	2918	2232	2686	2541	2698.2	2514	2591	2697	2344	2391	2507.4	2967	2856	2538	3112	2584	2252	2718.17
		90	4046	2882	3038	3132	3679	3355.4	3219	3305	2987	4181	4041	3546.6	4147	3858	3712	4236	3010	3792.6	4020	3766	2756	3307	3093	3388.4	3163	3177	3406	2904	3008	3131.6	3912	3758	3101	4138	3137	2718	3460.67
		95	5043	4242	4200	4009	4659	4430.6	4346	4621	4343	5280	5223	4762.6	5177	4817	4727	5336	4273	4866	5010	4746	3794	4476	4422	4489.6	4393	4361	4602	4332	4350	4407.6	4894	4678	4562	5153	4271	3716	4545.67
		LaSRC	07-09-22	08-02-19	07-19-20	07-01-19	08-10-22		07-06-21	08-07-21	07-17-19	06-23-22	07-01-22		07-10-22	08-11-22	08-02-22	07-02-22	07-28-20		06-15-22	07-17-22	08-04-20	06-13-21	07-12-20		07-10-19	06-20-21	07-31-21	08-11-19	07-26-19		07-18-22	07-26-22	06-26-20	06-16-22	06-24-19	07-15-21
		1	575	622	625	658	616	619.2	641	529	671	580	681	620.4	646	631	683	617	663	648	746	667	707	680	694	698.8	668	669	658	652	684	666.2	712	724	773	754	763	841	761.167
		3	687	689	705	732	702	703	730	659	755	718	776	727.6	756	737	779	746	768	757.2	842	762	812	786	779	796.2	750	754	742	749	766	752.2	813	838	840	855	862	909	852.833
		5	757	757	759	798	757	765.6	786	732	816	782	826	788.4	821	794	825	827	820	817.4	894	823	850	844	840	850.2	818	804	813	812	829	815.2	873	894	902	921	914	955	909.833
		10	862	874	883	919	853	878.2	891	854	923	921	954	908.6	944	906	920	952	934	931.2	1002	930	933	968	961	958.8	931	901	918	930	932	922.4	971	999	1018	1041	1037	1045	1018.5
		15	976	967	962	1012	954	974.2	987	957	999	1025	1053	1004.2	1050	1001	1017	1061	1039	1033.6	1093	1016	1012	1074	1063	1051.6	1042	1009	1024	1014	1024	1022.6	1059	1100	1124	1137	1132	1112	1110.67
		20	1090	1037	1045	1093	1055	1064	1076	1029	1077	1119	1138	1087.8	1141	1104	1096	1153	1116	1122	1182	1112	1083	1166	1158	1140.2	1142	1081	1128	1097	1104	1110.4	1159	1186	1203	1223	1210	1170	1191.83
		25	1175	1105	1119	1164	1131	1138.8	1153	1103	1156	1208	1234	1170.8	1236	1195	1186	1249	1194	1212	1260	1183	1149	1244	1241	1215.4	1229	1152	1210	1166	1194	1190.2	1249	1266	1280	1306	1307	1230	1273
		30	1255	1178	1195	1249	1211	1217.6	1235	1203	1228	1294	1323	1256.6	1347	1278	1267	1353	1276	1304.2	1357	1266	1210	1322	1307	1292.4	1313	1223	1296	1236	1264	1266.4	1338	1347	1358	1410	1375	1297	1354.17
		35	1339	1263	1284	1335	1297	1303.6	1316	1293	1302	1392	1416	1343.8	1440	1377	1362	1467	1370	1403.2	1439	1363	1274	1430	1399	1381	1394	1304	1381	1314	1349	1348.4	1445	1437	1437	1502	1454	1350	1437.5
		40	1462	1341	1367	1432	1400	1400.4	1419	1389	1390	1492	1523	1442.6	1551	1478	1463	1571	1468	1506.2	1530	1468	1349	1535	1489	1474.2	1489	1403	1494	1414	1460	1452	1532	1529	1536	1585	1555	1425	1527
		45	1590	1423	1459	1531	1514	1503.4	1508	1480	1471	1610	1629	1539.6	1656	1606	1567	1690	1547	1613.2	1637	1554	1428	1642	1585	1569.2	1593	1502	1603	1504	1536	1547.6	1633	1618	1621	1681	1647	1504	1617.33
		50	1708	1514	1558	1641	1626	1609.4	1592	1587	1548	1723	1736	1637.2	1779	1705	1669	1797	1636	1717.2	1736	1657	1503	1756	1680	1666.4	1686	1602	1707	1578	1618	1638.2	1739	1724	1705	1798	1744	1578	1714.67
		55	1825	1611	1647	1737	1740	1712	1695	1692	1650	1851	1855	1748.6	1915	1834	1764	1925	1749	1837.4	1848	1758	1572	1876	1803	1771.4	1796	1710	1834	1671	1720	1746.2	1876	1833	1814	1908	1851	1653	1822.5
		60	1935	1709	1764	1858	1856	1824.4	1791	1833	1758	1964	1984	1866	2048	1971	1896	2071	1864	1970	1971	1880	1668	2000	1910	1885.8	1907	1794	1963	1771	1829	1852.8	1981	1947	1921	2042	1955	1735	1930.17
		65	2046	1802	1848	1959	1977	1926.4	1890	1949	1846	2086	2080	1970.2	2182	2119	2017	2208	1959	2097	2062	1982	1744	2127	2035	1990	2026	1889	2099	1880	1936	1966	2101	2053	2031	2165	2074	1815	2039.83
		70	2178	1890	1953	2051	2102	2034.8	1993	2053	1953	2207	2213	2083.8	2308	2234	2125	2353	2048	2213.6	2192	2098	1817	2216	2128	2090.2	2118	1987	2187	1967	2027	2057.2	2197	2176	2129	2294	2173	1901	2145
		75	2343	1999	2086	2201	2220	2169.8	2111	2186	2063	2372	2369	2220.2	2445	2348	2267	2484	2163	2341.4	2335	2248	1915	2324	2219	2208.2	2228	2098	2310	2064	2122	2164.4	2318	2289	2227	2408	2262	1981	2247.5
		80	2645	2146	2223	2348	2418	2356	2308	2321	2201	2696	2665	2438.2	2640	2530	2457	2698	2277	2520.4	2608	2445	2044	2456	2350	2380.6	2358	2290	2424	2221	2244	2307.4	2509	2458	2347	2576	2372	2078	2390
		85	3246	2406	2465	2622	2936	2735	2677	2659	2423	3201	3179	2827.8	3200	2995	2888	3247	2494	2964.8	3094	2929	2265	2716	2560	2712.8	2549	2597	2729	2401	2422	2539.6	2971	2866	2574	3035	2552	2282	2713.33
		90	4086	2946	3088	3193	3736	3409.8	3249	3343	3031	4193	4019	3567	4137	3882	3674	4202	3041	3787.2	3948	3692	2765	3304	3101	3362	3189	3141	3390	2922	3014	3131.2	3834	3694	3108	4004	3099	2697	3406
		95	5006	4268	4235	4063	4622	4438.8	4315	4612	4370	5188	5107	4718.4	5110	4787	4619	5209	4204	4785.8	4872	4616	3712	4409	4348	4391.4	4367	4205	4492	4252	4244	4312	4716	4517	4426	4865	4156	3541	4370.17

## Sheet: B4 CDF
		Data Excerpted from Groups, this page.					Averages (n=5) to control uncertainty, n=6 for Group 6.
			TOA Reflectance					TOAR	CMAC						CMAC	LaSRC						LaSRC
		1	2	3	4	5	6	Overall	1	2	3	4	5	6	Overall	1	2	3	4	5	6	Overall
	Percentile	892.8	908.6	937.8	951.4	970	1012.33	Avgs	892.8	908.6	937.8	951.4	970	1012.33	Avgs	892.8	908.6	937.8	951.4	970	1012.33	Avgs
	1	866.4	899	912	954.4	943.2	1046.5	936.917	630	649	642.6	669.2	637.2	719.667	657.944	625.6	651.6	658.8	697.2	651.2	737.667	670.344
	3	945.2	977.8	1005.8	1042	1019.6	1121.67	1018.68	717.4	737	743.2	772	730	814.333	752.322	728	754.4	771.8	800.8	746.6	842.667	774.044
	5	1008.2	1037.4	1061.4	1094.8	1074.2	1169.17	1074.19	785.8	805.6	809.2	836.6	795.4	872.667	817.544	792.4	818.8	839.6	872.6	825	915.333	843.956
	10	1119	1158.2	1176.6	1207.8	1189.6	1274.83	1187.67	911.8	942	943.4	968.2	934.4	1003.33	950.522	931.2	961.2	972.2	1002.6	950.2	1049.67	977.844
	15	1225.8	1255.4	1283.6	1304.6	1284.8	1367.83	1287.01	1030.8	1054.8	1067	1083.2	1047.2	1120.67	1067.28	1052	1076.8	1097.6	1116.8	1070.8	1157.5	1095.25
	20	1314.6	1344.4	1380	1394.2	1371.2	1446.83	1375.21	1131.6	1155.4	1180.4	1189.6	1151.2	1218.17	1171.06	1148.2	1174.2	1200.8	1219.2	1174.6	1255.33	1195.39
	25	1394.4	1432	1469	1470.6	1450	1529.17	1457.53	1220	1255.6	1285.6	1280.2	1246	1320.17	1267.93	1240	1276.6	1311.2	1306.4	1269	1354.33	1292.92
	30	1479	1521.2	1561	1554.8	1528	1608.5	1542.08	1315.8	1356.4	1392.4	1378.8	1339.4	1419.83	1367.11	1332.8	1372.4	1415.8	1400.8	1359.6	1447.83	1388.21
	35	1562.8	1608	1655.2	1643.4	1605	1693.5	1627.98	1410	1454.6	1501.8	1482.8	1432.4	1525.67	1467.88	1431.6	1476.2	1525.4	1503.6	1455	1547.83	1489.94
	40	1662	1705.4	1752	1736.8	1702	1774.5	1722.12	1520.2	1565.8	1614.4	1593	1548.8	1626	1578.03	1539.4	1586.6	1638.8	1611.4	1570.2	1649.33	1599.29
	45	1766.6	1797.2	1851.4	1825	1797.4	1860.17	1816.29	1637.2	1670	1730.2	1698	1662.8	1732.83	1688.51	1655.2	1693.4	1754.4	1711.8	1680.8	1748.67	1707.38
	50	1861.2	1895	1954.4	1914.6	1885	1953	1910.53	1742.8	1781.4	1850	1803.8	1768	1848	1799	1761.8	1802.2	1874	1818.4	1785	1862.33	1817.29
	55	1964.6	2005	2070	2021.2	1988.6	2054.5	2017.32	1859	1906.4	1984.6	1930	1892	1974.17	1924.36	1883.8	1927.4	2005.4	1939	1898.4	1980.17	1939.03
	60	2071.8	2118.8	2201.6	2129.8	2093	2159.5	2129.08	1978.8	2035.6	2138	2057	2017.2	2104.33	2055.16	2005.2	2050.4	2152.2	2063.8	2023.8	2099.33	2065.79
	65	2171.4	2213.4	2302.6	2223.8	2194	2255.67	2226.81	2090.8	2143.8	2256	2169.4	2138.8	2225.33	2170.69	2113	2159.2	2275.2	2173.4	2137.4	2214.5	2178.78
	70	2268.8	2315.4	2413.4	2318.2	2280.6	2347.33	2323.96	2199.4	2259	2383.6	2280.6	2243.2	2340.33	2284.36	2222.6	2272	2402	2275.6	2236.6	2323.83	2288.77
	75	2403.4	2456.4	2527	2436.8	2381.6	2448	2442.2	2351.2	2422	2517.4	2421.6	2364.8	2464.33	2423.56	2377.4	2436.6	2535.6	2409	2354.2	2440	2425.47
	80	2587.8	2679.4	2705	2607.6	2505	2590.83	2612.61	2556.4	2675.2	2723.6	2624.2	2513.4	2641.67	2622.41	2584.4	2685	2743.2	2606	2501.2	2602.67	2620.41
	85	2960.8	3066.8	3138.8	2941.2	2745.6	2903.67	2959.48	2976.2	3111.6	3228.4	3015.4	2803.8	3033	3028.07	3002.4	3114.4	3234.6	2985.8	2777.8	2966	3013.5
	90	3653.6	3797.8	3962.8	3599.4	3306.6	3580.83	3650.17	3749.6	3942	4190.8	3792.8	3477	3872.17	3837.39	3757.4	3924.4	4142.6	3719.6	3421.2	3745.33	3785.09
	95	4654	4947	4935.8	4586.4	4448.4	4501.33	4678.82	4872.2	5259.8	5327.6	4967.4	4853	5026.67	5051.11	4832.4	5158.8	5197.4	4790.6	4694.8	4779.67	4908.94
		SZA	23.22	26.41	24.48	22.54	27.86	Group 1	23	27.37	24.11	22.01	22.6	Group 2	23.4	27.44	26.48	22.59	25.75	Group 3	21.84	24.18	26.9	21.78	23.64	Group 4	23.33	21.94	26.17	28.03	25.31	Group 5	24.23	25.39	22.27	21.76	22.09	23.94	Group 6
		Atm-I	890	891	892	893	898	892.8	903	904	908	912	916	908.6	932	934	937	942	944	937.8	945	950	951	954	957	951.4	959	962	973	974	982	970	994	995	996	1009	1018	1062	1012.33
		SENSOR	L8	L8	L8	L8	L8	Averages	L8	L8	L8	L8	L9	Averages	L9	L9	L9	L8	L8	Averages	L9	L9	L8	L8	L8	Averages	L8	L8	L8	L8	L8	Averages	L8	L9	L8	L8	L8	L8	Averages
		TOA	07-09-22	08-02-19	07-19-20	07-01-19	08-10-22		07-06-21	08-07-21	07-17-19	06-23-22	07-01-22		07-10-22	08-11-22	08-02-22	07-02-22	07-28-20		06-15-22	07-17-22	08-04-20	06-13-21	07-12-20		07-10-19	06-20-21	07-31-21	08-11-19	07-26-19		07-18-22	07-26-22	06-26-20	06-16-22	06-24-19	07-15-21
		1	869	857	853	911	842	866.4	888	873	908	890	936	899	914	875	921	926	924	912	1011	923	950	946	942	954.4	962	930	950	914	960	943.2	988	1026	1029	1087	1072	1077	1046.5
		3	952	929	935	978	932	945.2	981	932	984	986	1006	977.8	1011	965	1006	1023	1024	1005.8	1088	1006	1043	1030	1043	1042	1033	1014	1026	1000	1025	1019.6	1083	1098	1100	1158	1140	1151	1121.67
		5	1020	984	1000	1044	993	1008.2	1035	991	1047	1043	1071	1037.4	1061	1032	1046	1097	1071	1061.4	1136	1061	1081	1094	1102	1094.8	1092	1060	1082	1059	1078	1074.2	1131	1136	1149	1213	1191	1195	1169.17
		10	1124	1097	1120	1158	1096	1119	1150	1122	1156	1174	1189	1158.2	1197	1137	1161	1208	1180	1176.6	1252	1176	1179	1217	1215	1207.8	1205	1171	1205	1177	1190	1189.6	1225	1247	1276	1315	1308	1278	1274.83
		15	1249	1199	1219	1260	1202	1225.8	1245	1214	1241	1282	1295	1255.4	1315	1241	1253	1316	1293	1283.6	1347	1284	1257	1328	1307	1304.6	1309	1278	1302	1257	1278	1284.8	1335	1347	1356	1413	1402	1354	1367.83
		20	1353	1274	1303	1343	1300	1314.6	1341	1301	1319	1375	1386	1344.4	1412	1351	1337	1423	1377	1380	1439	1373	1334	1426	1399	1394.2	1405	1353	1394	1339	1365	1371.2	1426	1427	1443	1495	1476	1414	1446.83
		25	1437	1352	1377	1415	1391	1394.4	1417	1391	1400	1469	1483	1432	1517	1436	1426	1519	1447	1469	1528	1454	1394	1505	1472	1470.6	1485	1436	1481	1411	1437	1450	1510	1525	1515	1591	1555	1479	1529.17
		30	1535	1430	1457	1506	1467	1479	1511	1478	1481	1555	1581	1521.2	1601	1527	1529	1619	1529	1561	1625	1530	1473	1595	1551	1554.8	1573	1504	1566	1488	1509	1528	1603	1597	1595	1679	1630	1547	1608.5
		35	1614	1519	1538	1590	1553	1562.8	1583	1576	1568	1652	1661	1608	1706	1612	1611	1722	1625	1655.2	1705	1631	1538	1693	1650	1643.4	1644	1581	1647	1563	1590	1605	1693	1684	1681	1766	1723	1614	1693.5
		40	1723	1606	1640	1688	1653	1662	1685	1665	1651	1755	1771	1705.4	1805	1712	1695	1829	1719	1752	1799	1717	1618	1793	1757	1736.8	1728	1676	1742	1672	1692	1702	1780	1773	1770	1843	1806	1675	1774.5
		45	1855	1695	1735	1792	1756	1766.6	1775	1747	1730	1859	1875	1797.2	1898	1833	1799	1929	1798	1851.4	1886	1819	1687	1897	1836	1825	1829	1772	1851	1752	1783	1797.4	1871	1858	1846	1937	1891	1758	1860.17
		50	1968	1767	1817	1883	1871	1861.2	1864	1852	1813	1969	1977	1895	2016	1927	1897	2042	1890	1954.4	1986	1918	1758	2001	1910	1914.6	1926	1872	1946	1829	1852	1885	1978	1962	1934	2042	1979	1823	1953
		55	2076	1859	1922	1987	1979	1964.6	1960	1964	1906	2091	2104	2005	2155	2041	1986	2171	1997	2070	2103	2009	1840	2116	2038	2021.2	2038	1979	2063	1907	1956	1988.6	2095	2059	2036	2148	2080	1909	2054.5
		60	2186	1965	2028	2094	2086	2071.8	2057	2091	2010	2207	2229	2118.8	2290	2186	2117	2305	2110	2201.6	2220	2122	1937	2233	2137	2129.8	2138	2066	2179	2024	2058	2093	2203	2176	2149	2270	2170	1989	2159.5
		65	2294	2065	2110	2195	2193	2171.4	2155	2201	2102	2303	2306	2213.4	2391	2297	2212	2420	2193	2302.6	2299	2219	2012	2341	2248	2223.8	2236	2155	2317	2118	2144	2194	2305	2270	2227	2381	2280	2071	2255.67
		70	2407	2141	2196	2281	2319	2268.8	2254	2294	2184	2411	2434	2315.4	2502	2414	2327	2546	2278	2413.4	2425	2327	2086	2425	2328	2318.2	2327	2249	2402	2195	2230	2280.6	2399	2368	2319	2487	2366	2145	2347.33
		75	2588	2253	2322	2418	2436	2403.4	2363	2427	2304	2600	2588	2456.4	2623	2517	2448	2667	2380	2527	2581	2470	2180	2522	2431	2436.8	2428	2361	2510	2283	2326	2381.6	2497	2482	2419	2595	2462	2233	2448
		80	2897	2389	2454	2558	2641	2587.8	2572	2568	2433	2912	2912	2679.4	2831	2693	2653	2874	2474	2705	2847	2694	2294	2651	2552	2607.6	2545	2542	2609	2407	2422	2505	2701	2664	2517	2771	2567	2325	2590.83
		85	3435	2651	2728	2870	3120	2960.8	2931	2905	2651	3414	3433	3066.8	3347	3145	3101	3393	2708	3138.8	3353	3174	2516	2910	2753	2941.2	2712	2853	2922	2620	2621	2745.6	3126	3018	2736	3260	2732	2550	2903.67
		90	4411	3210	3296	3393	3958	3653.6	3482	3589	3276	4366	4276	3797.8	4297	4039	3878	4361	3239	3962.8	4198	3993	3042	3513	3251	3599.4	3330	3394	3501	3098	3210	3306.6	3987	3895	3274	4149	3241	2939	3580.83
		95	5290	4481	4413	4230	4856	4654	4611	4805	4534	5407	5378	4947	5246	4908	4806	5343	4376	4935.8	5114	4865	3947	4564	4442	4586.4	4400	4493	4678	4323	4348	4448.4	4819	4662	4484	5020	4218	3805	4501.33
		CMAC	07-09-22	08-02-19	07-19-20	07-01-19	08-10-22		07-06-21	08-07-21	07-17-19	06-23-22	07-01-22		07-10-22	08-11-22	08-02-22	07-02-22	07-28-20		06-15-22	07-17-22	08-04-20	06-13-21	07-12-20		07-10-19	06-20-21	07-31-21	08-11-19	07-26-19		07-18-22	07-26-22	06-26-20	06-16-22	06-24-19	07-15-21
		1	637	620	616	679	598	630	638	626	658	637	686	649	656	605	653	650	649	642.6	748	632	663	654	649	669.2	674	627	636	602	647	637.2	663	711	721	775	741	707	719.667
		3	723	699	709	758	698	717.4	739	691	748	745	762	737	757	698	742	756	763	743.2	828	732	773	757	770	772	761	727	733	705	724	730	785	799	806	867	829	800	814.333
		5	797	761	781	825	765	785.8	805	754	819	808	842	805.6	811	775	797	845	818	809.2	892	802	824	830	835	836.6	826	785	802	780	784	795.4	840	851	864	928	893	860	872.667
		10	919	889	915	954	882	911.8	936	905	940	956	973	942	971	899	927	976	944	943.4	1022	934	935	978	972	968.2	963	917	951	916	925	934.4	957	984	1016	1056	1040	967	1003.33
		15	1057	1002	1027	1072	996	1030.8	1043	1012	1039	1081	1099	1054.8	1105	1020	1034	1101	1075	1067	1137	1059	1028	1109	1083	1083.2	1083	1042	1065	1013	1033	1047.2	1092	1104	1117	1181	1160	1070	1120.67
		20	1173	1088	1122	1164	1111	1131.6	1155	1109	1128	1185	1200	1155.4	1222	1148	1129	1228	1175	1180.4	1248	1165	1115	1225	1195	1189.6	1196	1132	1180	1111	1137	1151.2	1204	1205	1222	1280	1253	1145	1218.17
		25	1268	1175	1202	1243	1212	1220	1241	1211	1220	1295	1311	1255.6	1345	1247	1236	1342	1258	1285.6	1350	1264	1188	1320	1279	1280.2	1295	1232	1280	1197	1226	1246	1307	1322	1314	1400	1350	1228	1320.17
		30	1379	1262	1293	1346	1299	1315.8	1345	1311	1311	1394	1421	1356.4	1443	1354	1355	1458	1352	1392.4	1463	1353	1281	1425	1372	1378.8	1400	1314	1386	1288	1309	1339.4	1420	1411	1413	1510	1446	1319	1419.83
		35	1467	1363	1384	1439	1397	1410	1427	1420	1410	1502	1514	1454.6	1562	1452	1450	1579	1466	1501.8	1558	1470	1356	1541	1489	1482.8	1484	1407	1481	1380	1410	1432.4	1531	1522	1515	1618	1563	1405	1525.67
		40	1589	1456	1496	1550	1510	1520.2	1543	1521	1503	1621	1641	1565.8	1677	1568	1548	1704	1575	1614.4	1667	1570	1453	1659	1616	1593	1582	1519	1596	1514	1533	1548.8	1637	1630	1625	1713	1664	1487	1626
		45	1736	1558	1601	1666	1625	1637.2	1645	1614	1593	1740	1758	1670	1785	1709	1669	1821	1667	1730.2	1770	1693	1534	1783	1710	1698	1703	1634	1727	1607	1643	1662.8	1749	1733	1718	1830	1771	1596	1732.83
		50	1862	1637	1694	1767	1754	1742.8	1746	1733	1688	1865	1875	1781.4	1922	1818	1783	1952	1775	1850	1888	1808	1619	1906	1798	1803.8	1817	1753	1841	1701	1728	1768	1880	1861	1827	1960	1882	1678	1848
		55	1984	1740	1811	1884	1876	1859	1855	1859	1794	2004	2020	1906.4	2083	1951	1886	2103	1900	1984.6	2026	1915	1716	2042	1951	1930	1950	1880	1982	1795	1853	1892	2024	1981	1952	2092	2007	1789	1974.17
		60	2107	1859	1929	2002	1997	1978.8	1964	2002	1912	2136	2164	2035.6	2237	2120	2039	2261	2033	2138	2161	2047	1830	2180	2067	2057	2068	1985	2122	1934	1977	2017.2	2157	2123	2090	2243	2119	1894	2104.33
		65	2231	1969	2022	2116	2116	2090.8	2075	2127	2016	2249	2252	2143.8	2353	2249	2151	2396	2131	2256	2257	2164	1919	2308	2199	2169.4	2185	2090	2288	2049	2082	2138.8	2281	2240	2188	2383	2260	2000	2225.33
		70	2352	2056	2117	2215	2257	2199.4	2188	2234	2109	2371	2393	2259	2484	2383	2282	2540	2229	2383.6	2401	2292	2006	2409	2295	2280.6	2295	2204	2392	2139	2186	2243.2	2398	2363	2301	2514	2368	2098	2340.33
		75	2559	2179	2258	2368	2392	2351.2	2315	2385	2244	2591	2575	2422	2629	2503	2425	2683	2347	2517.4	2589	2460	2120	2523	2416	2421.6	2411	2339	2522	2248	2304	2364.8	2517	2502	2420	2650	2486	2211	2464.33
		80	2901	2330	2406	2523	2622	2556.4	2552	2544	2388	2948	2944	2675.2	2867	2704	2659	2931	2457	2723.6	2905	2724	2255	2677	2560	2624.2	2554	2556	2641	2396	2420	2513.4	2764	2724	2542	2871	2615	2334	2641.67
		85	3500	2625	2714	2877	3165	2976.2	2951	2925	2639	3514	3529	3111.6	3446	3237	3192	3536	2731	3228.4	3486	3292	2516	2984	2799	3015.4	2754	2930	3021	2653	2661	2803.8	3292	3165	2812	3484	2826	2619	3033
		90	4584	3251	3349	3464	4100	3749.6	3585	3697	3347	4588	4493	3942	4579	4278	4080	4669	3348	4190.8	4486	4243	3141	3697	3397	3792.8	3490	3571	3722	3225	3377	3477	4329	4235	3477	4587	3475	3130	3872.17
		95	5547	4683	4607	4408	5116	4872.2	4867	5087	4777	5804	5764	5259.8	5663	5294	5155	5818	4708	5327.6	5560	5295	4230	4947	4805	4967.4	4756	4880	5134	4719	4776	4853	5370	5204	4982	5658	4680	4266	5026.67
		LaSRC	07-09-22	08-02-19	07-19-20	07-01-19	08-10-22		07-06-21	08-07-21	07-17-19	06-23-22	07-01-22		07-10-22	08-11-22	08-02-22	07-02-22	07-28-20		06-15-22	07-17-22	08-04-20	06-13-21	07-12-20		07-10-19	06-20-21	07-31-21	08-11-19	07-26-19		07-18-22	07-26-22	06-26-20	06-16-22	06-24-19	07-15-21
		1	592	631	619	675	611	625.6	659	589	689	627	694	651.6	646	673	685	638	652	658.8	761	683	712	658	672	697.2	663	654	628	649	662	651.2	699	707	743	740	732	805	737.667
		3	713	722	729	758	718	728	752	695	782	747	796	754.4	757	775	790	756	781	771.8	869	774	821	766	774	800.8	754	745	736	741	757	746.6	800	834	825	862	835	900	842.667
		5	782	777	792	831	780	792.4	815	748	845	823	863	818.8	834	840	849	842	833	839.6	925	845	877	858	858	872.6	845	815	818	818	829	825	876	906	900	944	902	964	915.333
		10	927	922	928	977	902	931.2	950	899	975	977	1005	961.2	994	955	961	986	965	972.2	1068	970	980	1005	990	1002.6	960	950	938	948	955	950.2	1000	1029	1057	1077	1058	1077	1049.67
		15	1066	1039	1040	1087	1028	1052	1066	1021	1065	1102	1130	1076.8	1113	1092	1076	1129	1078	1097.6	1170	1103	1070	1129	1112	1116.8	1083	1072	1081	1056	1062	1070.8	1114	1151	1164	1198	1159	1159	1157.5
		20	1178	1125	1123	1174	1141	1148.2	1166	1115	1156	1206	1228	1174.2	1226	1190	1163	1233	1192	1200.8	1279	1194	1158	1246	1219	1219.2	1207	1166	1182	1150	1168	1174.6	1221	1254	1263	1294	1260	1240	1255.33
		25	1278	1208	1213	1266	1235	1240	1263	1216	1242	1319	1343	1276.6	1359	1302	1267	1343	1285	1311.2	1372	1282	1233	1330	1315	1306.4	1309	1250	1292	1233	1261	1269	1328	1364	1352	1400	1367	1315	1354.33
		30	1382	1296	1307	1359	1320	1332.8	1356	1318	1334	1413	1441	1372.4	1451	1408	1384	1463	1373	1415.8	1482	1382	1313	1428	1399	1400.8	1405	1333	1387	1328	1345	1359.6	1439	1459	1443	1503	1451	1392	1447.83
		35	1478	1398	1400	1462	1420	1431.6	1453	1425	1431	1531	1541	1476.2	1571	1504	1485	1585	1482	1525.4	1572	1489	1393	1550	1514	1503.6	1497	1430	1483	1419	1446	1455	1547	1551	1550	1617	1546	1476	1547.83
		40	1596	1487	1513	1566	1535	1539.4	1576	1534	1527	1640	1656	1586.6	1699	1621	1574	1702	1598	1638.8	1675	1601	1482	1667	1632	1611.4	1596	1538	1607	1544	1566	1570.2	1662	1659	1655	1709	1660	1551	1649.33
		45	1739	1584	1615	1687	1651	1655.2	1665	1629	1624	1765	1784	1693.4	1805	1750	1703	1822	1692	1754.4	1782	1706	1562	1788	1721	1711.8	1722	1645	1731	1643	1663	1680.8	1762	1754	1749	1818	1762	1647	1748.67
		50	1872	1662	1704	1789	1782	1761.8	1760	1747	1709	1897	1898	1802.2	1955	1859	1804	1956	1796	1874	1896	1819	1641	1918	1818	1818.4	1832	1758	1848	1727	1760	1785	1891	1884	1847	1950	1871	1731	1862.33
		55	2000	1781	1822	1910	1906	1883.8	1875	1881	1817	2034	2030	1927.4	2101	2000	1915	2096	1915	2005.4	2025	1932	1738	2039	1961	1939	1950	1882	1976	1820	1864	1898.4	2029	2002	1967	2067	1995	1821	1980.17
		60	2127	1896	1940	2036	2027	2005.2	1974	2009	1937	2159	2173	2050.4	2244	2163	2061	2256	2037	2152.2	2157	2055	1846	2182	2079	2063.8	2078	1979	2117	1953	1992	2023.8	2148	2134	2088	2209	2098	1919	2099.33
		65	2249	1999	2033	2139	2145	2113	2092	2135	2035	2266	2268	2159.2	2376	2299	2170	2392	2139	2275.2	2256	2173	1932	2303	2203	2173.4	2187	2083	2262	2059	2096	2137.4	2277	2242	2186	2339	2222	2021	2214.5
		70	2371	2084	2133	2236	2289	2222.6	2195	2237	2130	2385	2413	2272	2504	2432	2298	2537	2239	2402	2384	2290	2006	2404	2294	2275.6	2300	2191	2358	2145	2189	2236.6	2388	2356	2297	2473	2325	2104	2323.83
		75	2584	2214	2281	2388	2420	2377.4	2335	2398	2261	2604	2585	2436.6	2641	2552	2440	2682	2363	2535.6	2566	2450	2119	2519	2391	2409	2413	2313	2480	2259	2306	2354.2	2506	2487	2406	2601	2435	2205	2440
		80	2919	2366	2427	2553	2657	2584.4	2569	2552	2407	2951	2946	2685	2892	2752	2673	2926	2473	2743.2	2871	2704	2250	2660	2545	2606	2550	2524	2603	2406	2423	2501.2	2741	2702	2528	2798	2540	2307	2602.67
		85	3524	2662	2731	2899	3196	3002.4	2971	2912	2652	3526	3511	3114.4	3464	3264	3184	3527	2734	3234.6	3433	3249	2500	2957	2790	2985.8	2743	2879	2982	2649	2636	2777.8	3246	3117	2786	3362	2734	2551	2966
		90	4560	3282	3355	3490	4100	3757.4	3573	3698	3348	4568	4435	3924.4	4511	4261	4033	4574	3334	4142.6	4359	4144	3088	3643	3364	3719.6	3471	3466	3650	3201	3318	3421.2	4221	4102	3413	4342	3368	3026	3745.33
		95	5482	4655	4587	4386	5052	4832.4	4803	5040	4710	5653	5588	5158.8	5565	5207	5006	5637	4572	5197.4	5336	5091	4081	4788	4657	4790.6	4673	4665	4931	4588	4617	4694.8	5147	4958	4784	5302	4471	4016	4779.67

[truncated: 1 more sheets: B5 CDF]
